# Supplementary material for: Correcting for Model Changes in Statistical Post-Processing – An approach based on Response Theory
Source: Copernicus journal article supplement (doi:10.5194/npg-2019-57), 2019-11-21

# Supplementary Material 2: Additional Figures

## Correcting for Model Changes in Statistical Post-Processing

Jonathan Demaeyer and Stéphane Vannitsem

*Institut Royal Météorologique de Belgique, Avenue Circulaire, 3, 1180 Brussels, Belgium*  
*European Meteorological Network, Avenue Circulaire, 3, 1180 Brussels, Belgium*

### Abstract

In this supplementary note, the results for all the variables of the quasi-geostrophic system are depicted. We consider the streamfunction variables  $\psi_1, \dots, \psi_{10}$  and the temperature variables  $\theta_1, \dots, \theta_{10}$ , corresponding to the modes:

$$\begin{aligned} F_1(x, y) &= \sqrt{2} \cos(y), \\ F_2(x, y) &= 2 \cos(nx) \sin(y), \\ F_3(x, y) &= 2 \sin(nx) \sin(y), \\ F_4(x, y) &= \sqrt{2} \cos(2y), \\ F_5(x, y) &= 2 \cos(nx) \sin(2y), \\ F_6(x, y) &= 2 \sin(nx) \sin(2y), \\ F_7(x, y) &= 2 \cos(2nx) \sin(y), \\ F_8(x, y) &= 2 \sin(2nx) \sin(y), \\ F_9(x, y) &= 2 \cos(2nx) \sin(2y), \\ F_{10}(x, y) &= 2 \sin(2nx) \sin(2y), \end{aligned}$$

Each variables have been corrected by using itself as the unique predictor, according to the different models and methods described in the main article. Three figures per variable are shown in the following order:

1. The corrections of the moments of the variable (similar to Figs. 5 and 7 of the main article).
2. The performance of the correction (similar to Figs. 6 and 8 of the main article).
3. The comparison of the efficiency of the response theory correction for different numbers  $m$  of trajectories (similar to Fig. 10 of the main article).

# Contents

|          |                                                             |           |
|----------|-------------------------------------------------------------|-----------|
| <b>1</b> | <b>Experiment varying the friction coefficient</b>          | <b>3</b>  |
| 1.1      | Variable $\psi_1$                                           | 3         |
| 1.2      | Variable $\psi_2$                                           | 5         |
| 1.3      | Variable $\psi_3$                                           | 7         |
| 1.4      | Variable $\psi_4$                                           | 9         |
| 1.5      | Variable $\psi_5$                                           | 11        |
| 1.6      | Variable $\psi_6$                                           | 13        |
| 1.7      | Variable $\psi_7$                                           | 15        |
| 1.8      | Variable $\psi_8$                                           | 17        |
| 1.9      | Variable $\psi_9$                                           | 19        |
| 1.10     | Variable $\psi_{10}$                                        | 21        |
| 1.11     | Variable $\theta_1$                                         | 23        |
| 1.12     | Variable $\theta_2$                                         | 25        |
| 1.13     | Variable $\theta_3$                                         | 27        |
| 1.14     | Variable $\theta_4$                                         | 29        |
| 1.15     | Variable $\theta_5$                                         | 31        |
| 1.16     | Variable $\theta_6$                                         | 33        |
| 1.17     | Variable $\theta_7$                                         | 35        |
| 1.18     | Variable $\theta_8$                                         | 37        |
| 1.19     | Variable $\theta_9$                                         | 39        |
| 1.20     | Variable $\theta_{10}$                                      | 41        |
| <b>2</b> | <b>Experiment varying the Newtonian cooling coefficient</b> | <b>43</b> |
| 2.1      | Variable $\psi_1$                                           | 43        |
| 2.2      | Variable $\psi_2$                                           | 45        |
| 2.3      | Variable $\psi_3$                                           | 47        |
| 2.4      | Variable $\psi_4$                                           | 49        |
| 2.5      | Variable $\psi_5$                                           | 51        |
| 2.6      | Variable $\psi_6$                                           | 53        |
| 2.7      | Variable $\psi_7$                                           | 55        |
| 2.8      | Variable $\psi_8$                                           | 57        |
| 2.9      | Variable $\psi_9$                                           | 59        |
| 2.10     | Variable $\psi_{10}$                                        | 61        |
| 2.11     | Variable $\theta_1$                                         | 63        |
| 2.12     | Variable $\theta_2$                                         | 65        |
| 2.13     | Variable $\theta_3$                                         | 67        |
| 2.14     | Variable $\theta_4$                                         | 69        |
| 2.15     | Variable $\theta_5$                                         | 71        |
| 2.16     | Variable $\theta_6$                                         | 73        |
| 2.17     | Variable $\theta_7$                                         | 75        |
| 2.18     | Variable $\theta_8$                                         | 77        |
| 2.19     | Variable $\theta_9$                                         | 79        |
| 2.20     | Variable $\theta_{10}$                                      | 81        |

# 1 Experiment varying the friction coefficient

## 1.1 Variable $\psi_1$

### 1.1.1 Corrections of the moments of the variable

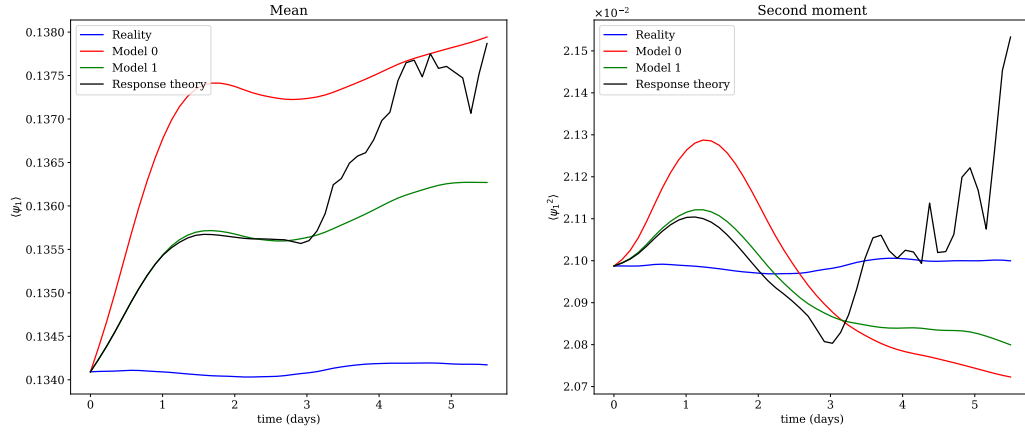

### 1.1.2 Performance of the correction

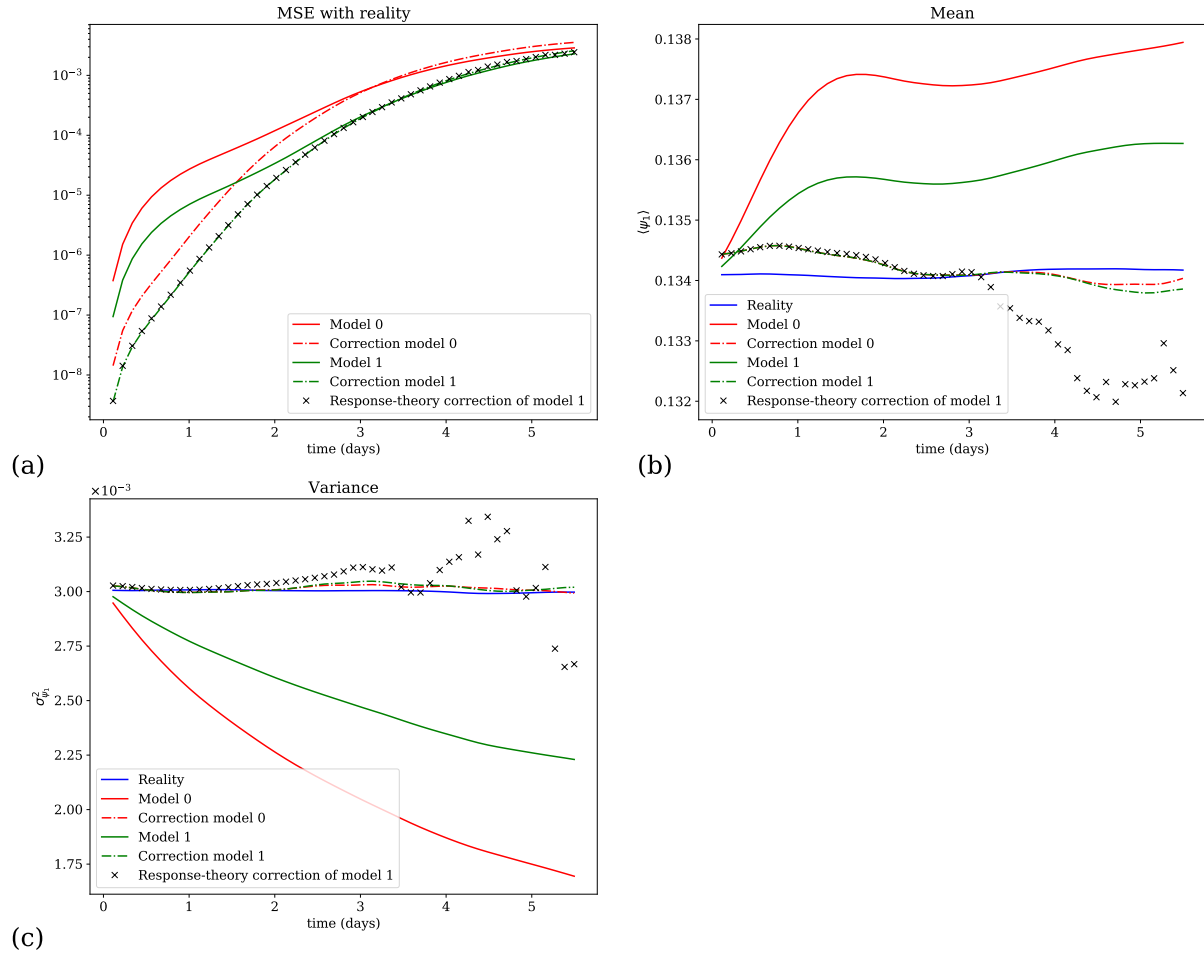

### 1.1.3 Comparison of the efficiency of the response theory correction for different numbers $m$ of trajectories

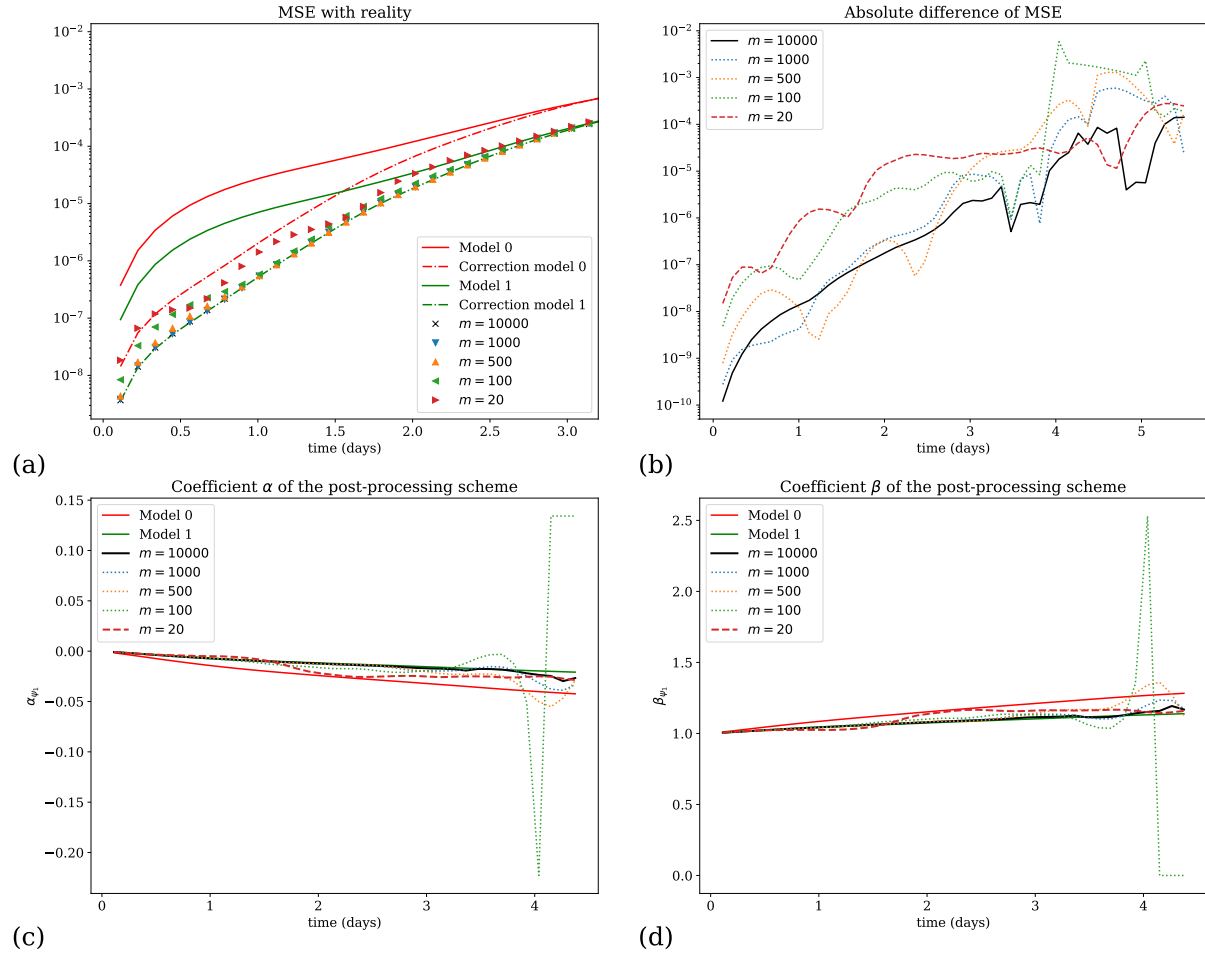

## 1.2 Variable $\psi_2$

### 1.2.1 Corrections of the moments of the variable

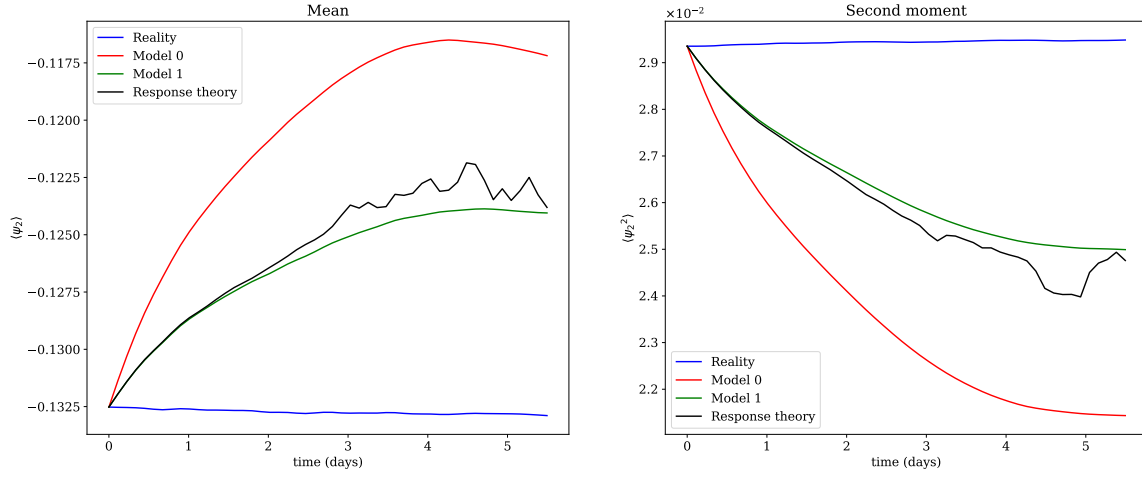

### 1.2.2 Performance of the correction

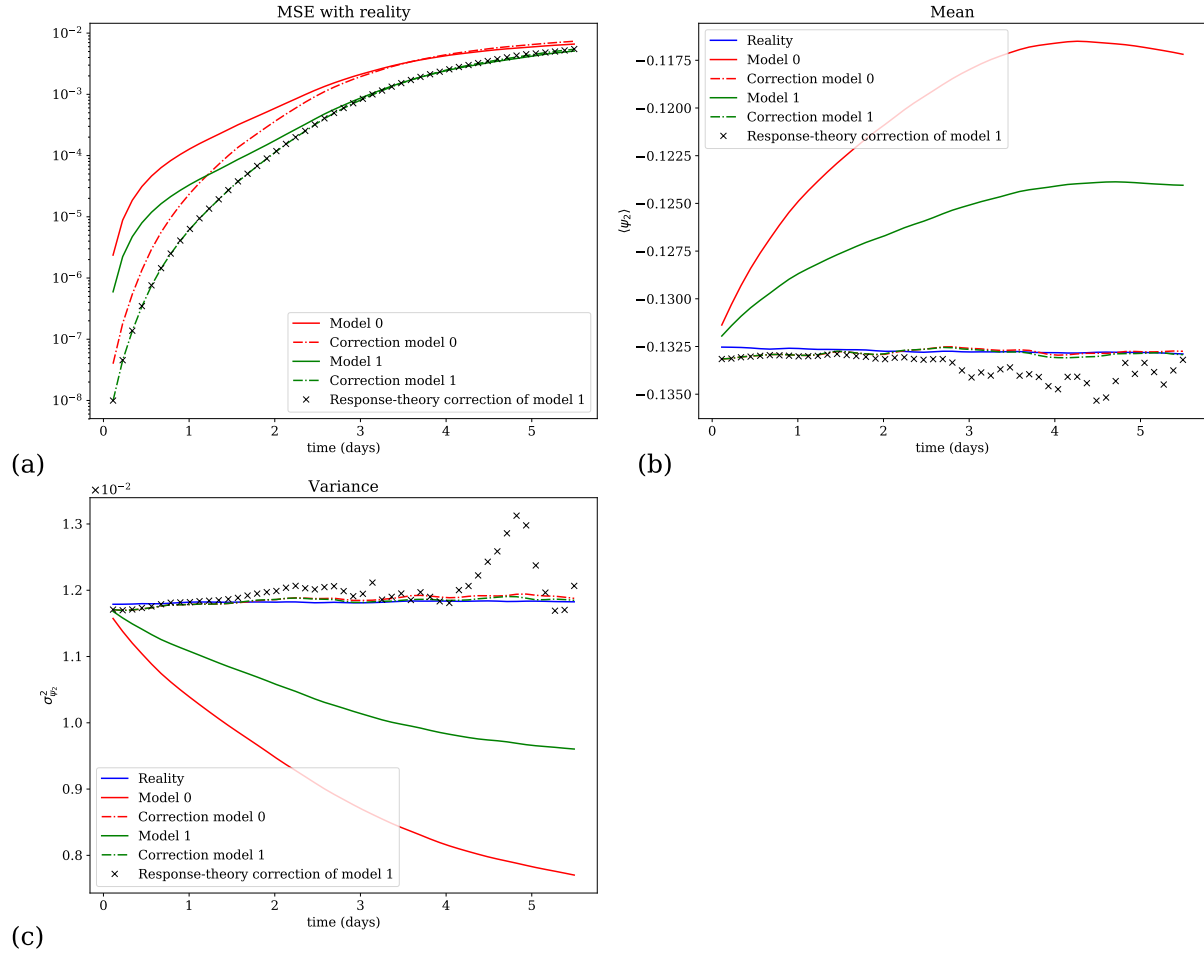

### 1.2.3 Comparison of the efficiency of the response theory correction for different numbers $m$ of trajectories

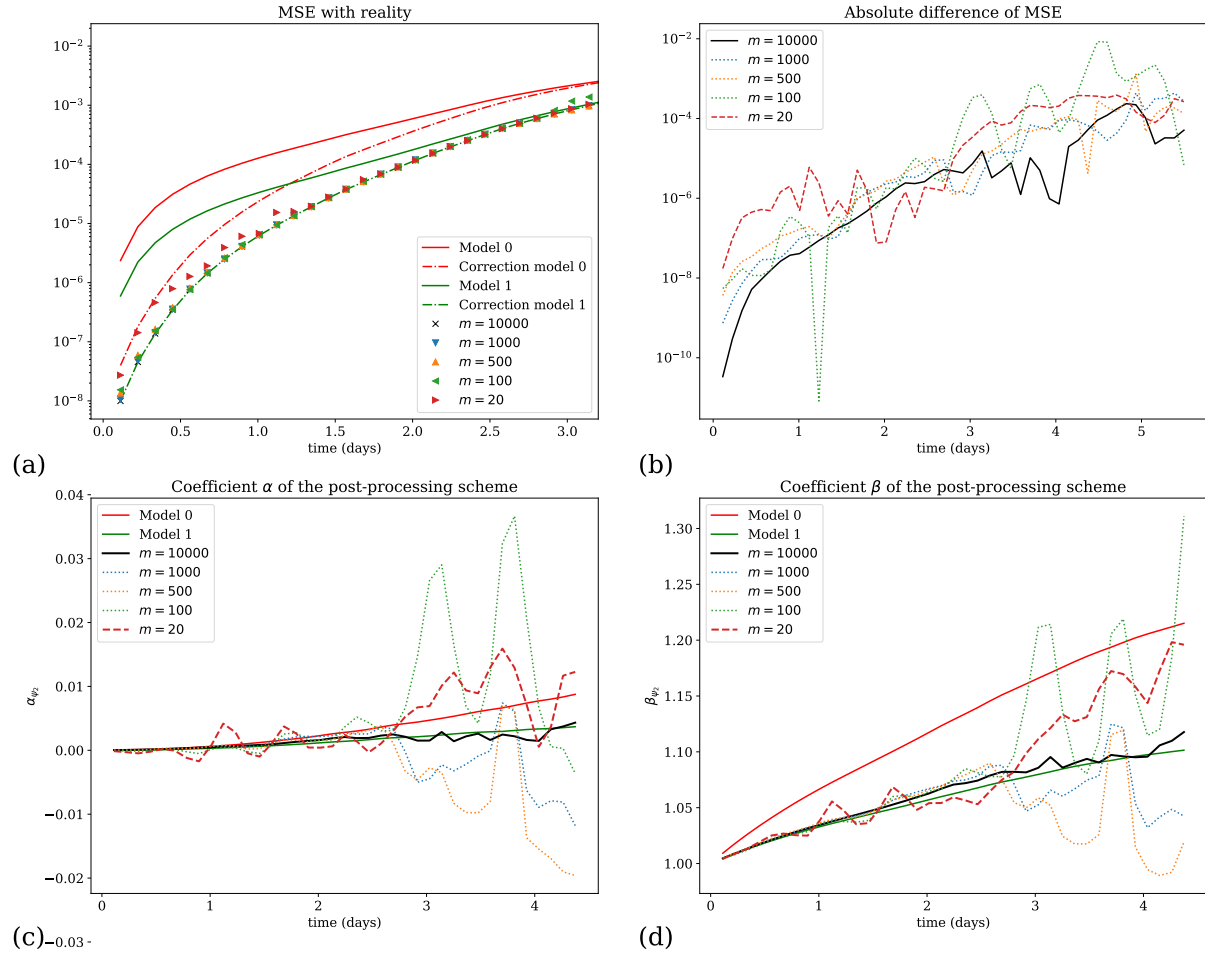

### 1.3 Variable $\psi_3$

#### 1.3.1 Corrections of the moments of the variable

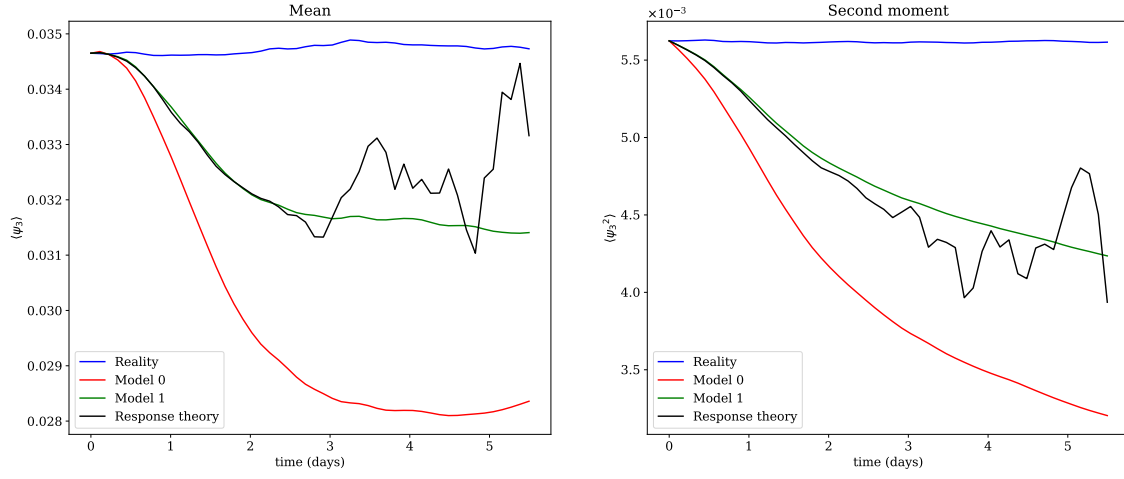

#### 1.3.2 Performance of the correction

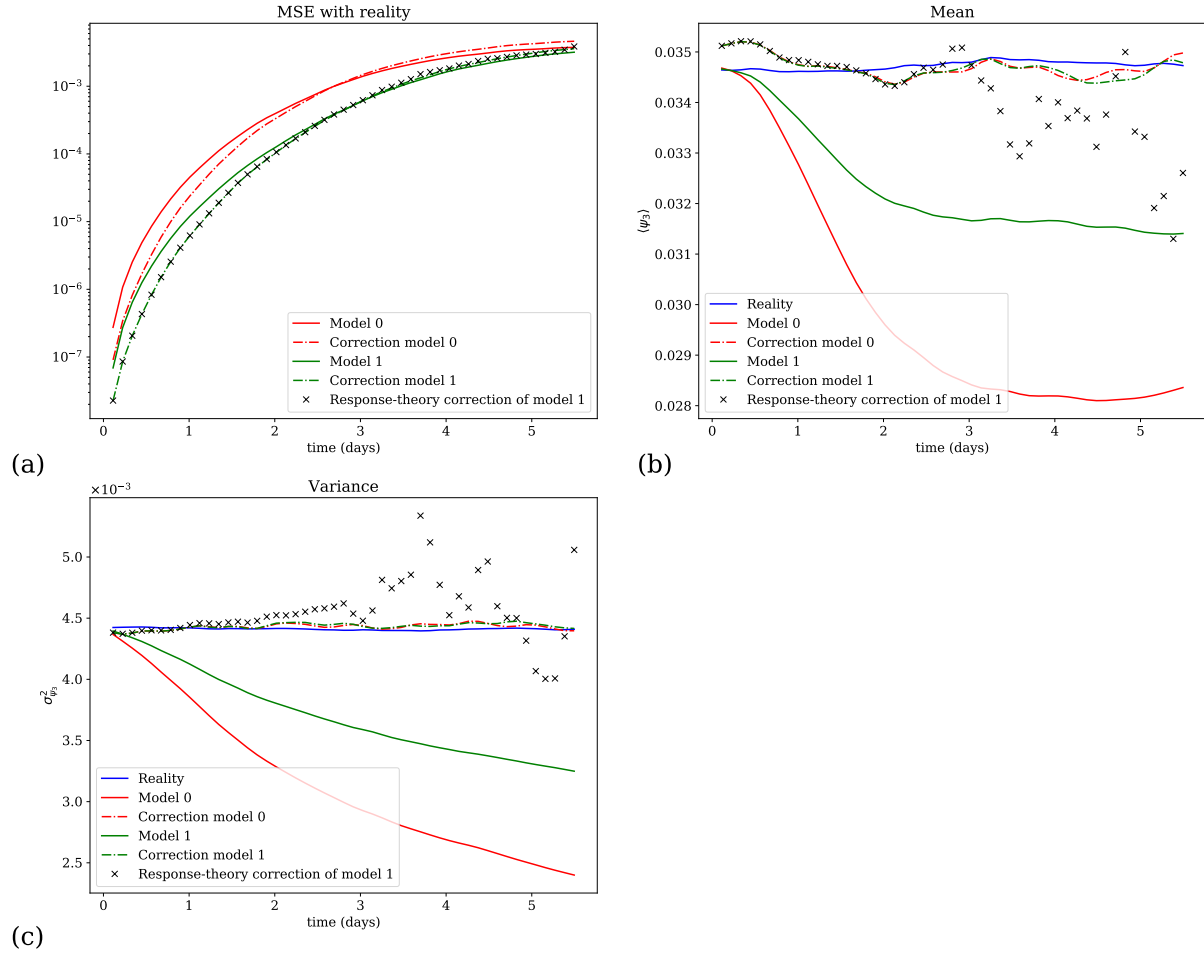

### 1.3.3 Comparison of the efficiency of the response theory correction for different numbers $m$ of trajectories

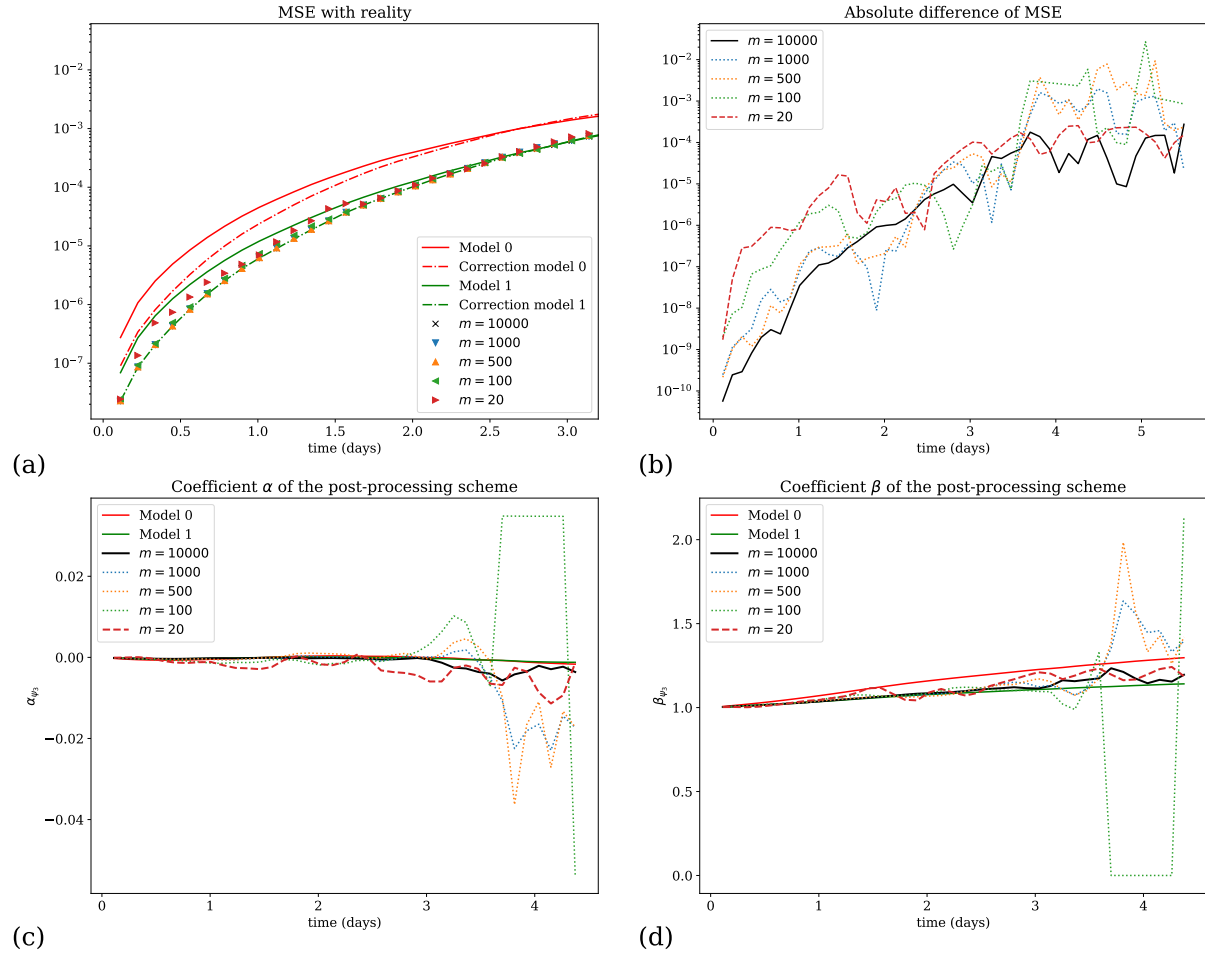



## 1.4 Variable $\psi_4$

### 1.4.1 Corrections of the moments of the variable

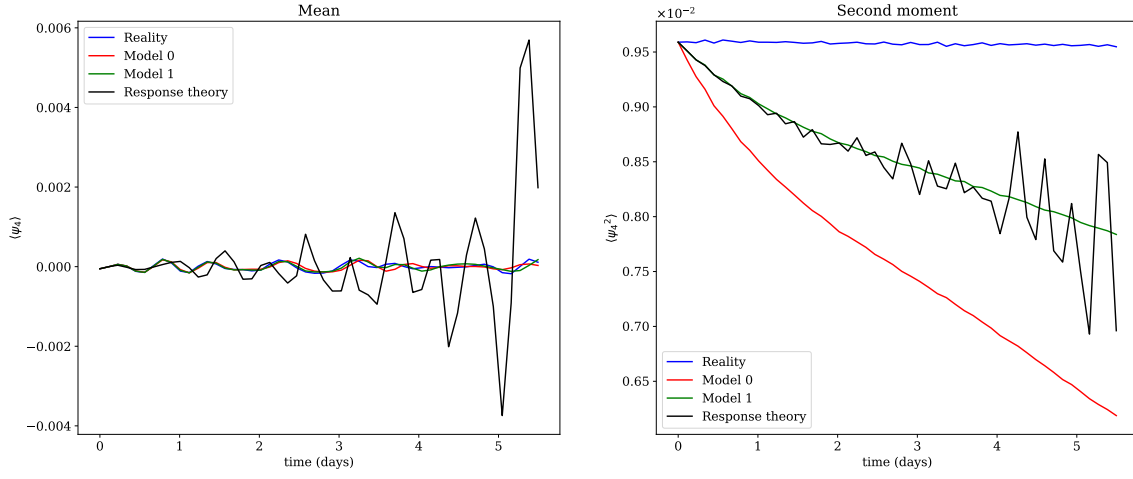

### 1.4.2 Performance of the correction

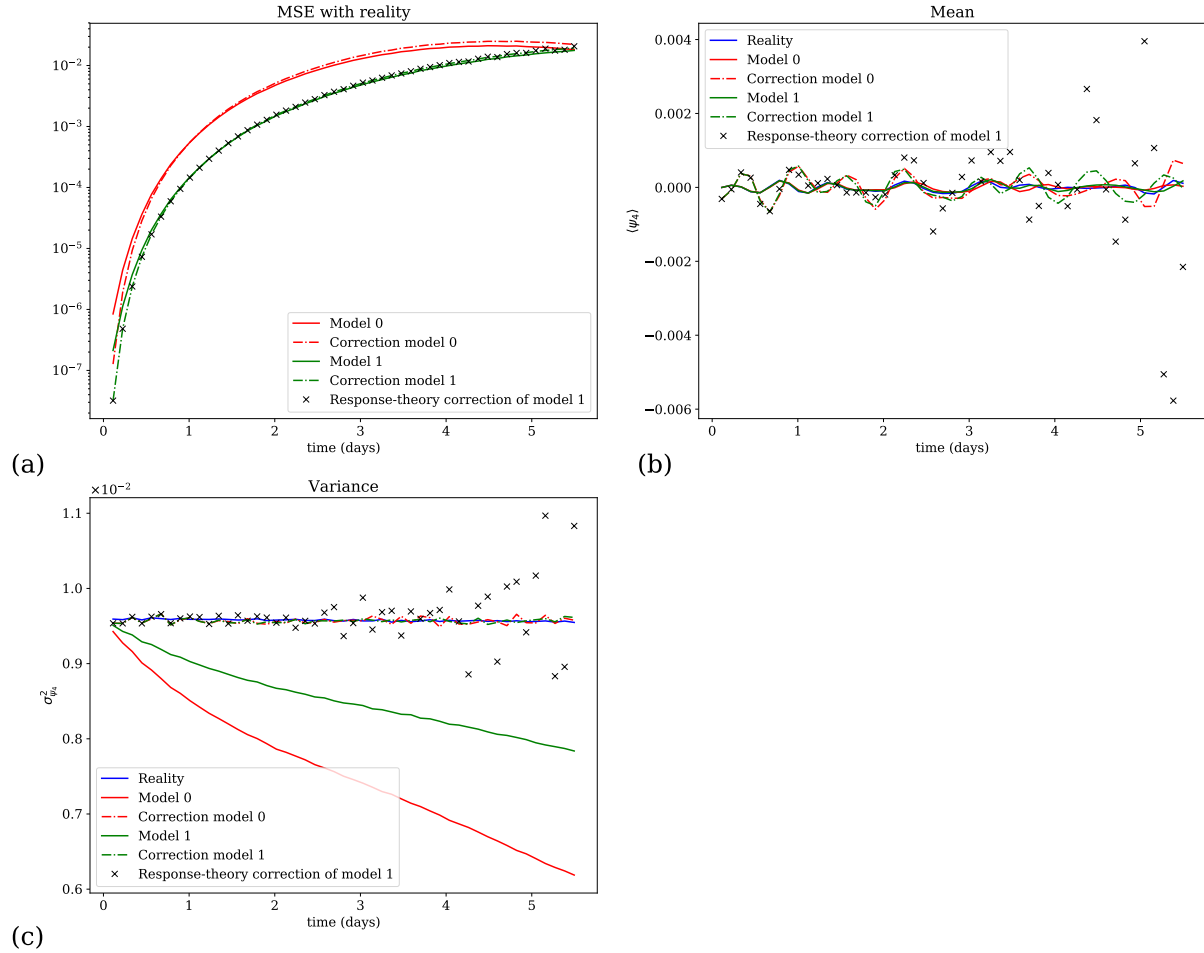

### 1.4.3 Comparison of the efficiency of the response theory correction for different numbers $m$ of trajectories

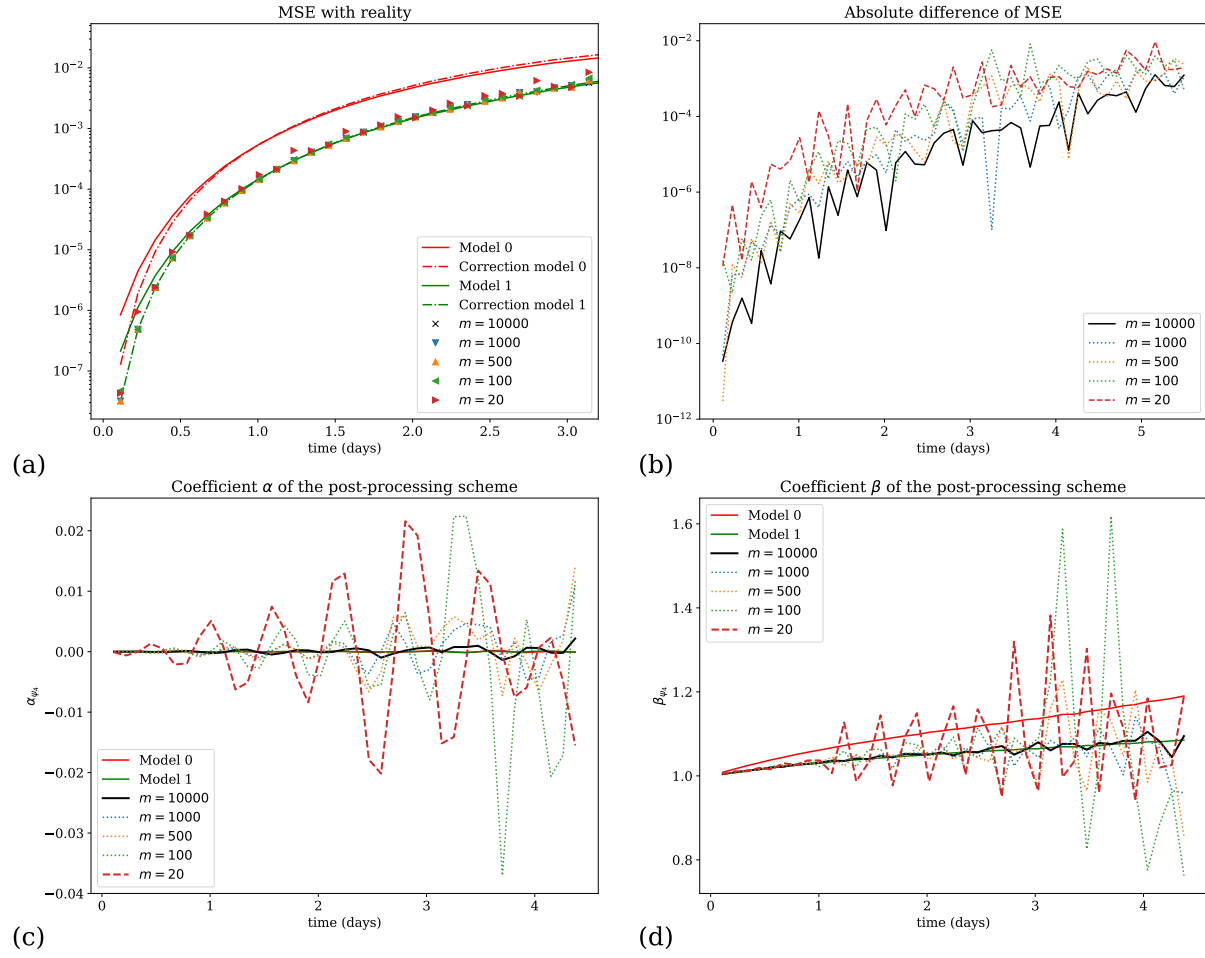

## 1.5 Variable $\psi_5$

### 1.5.1 Corrections of the moments of the variable

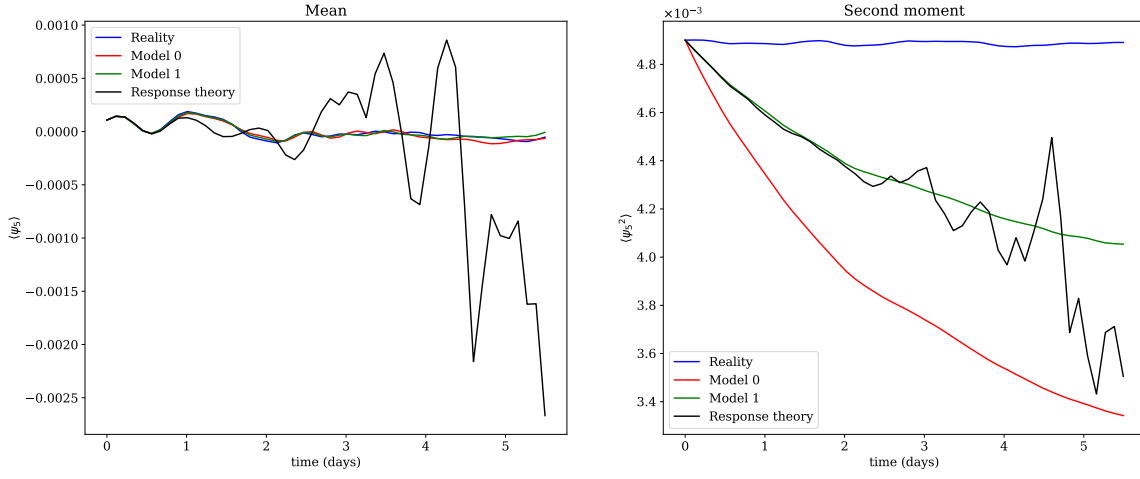

### 1.5.2 Performance of the correction

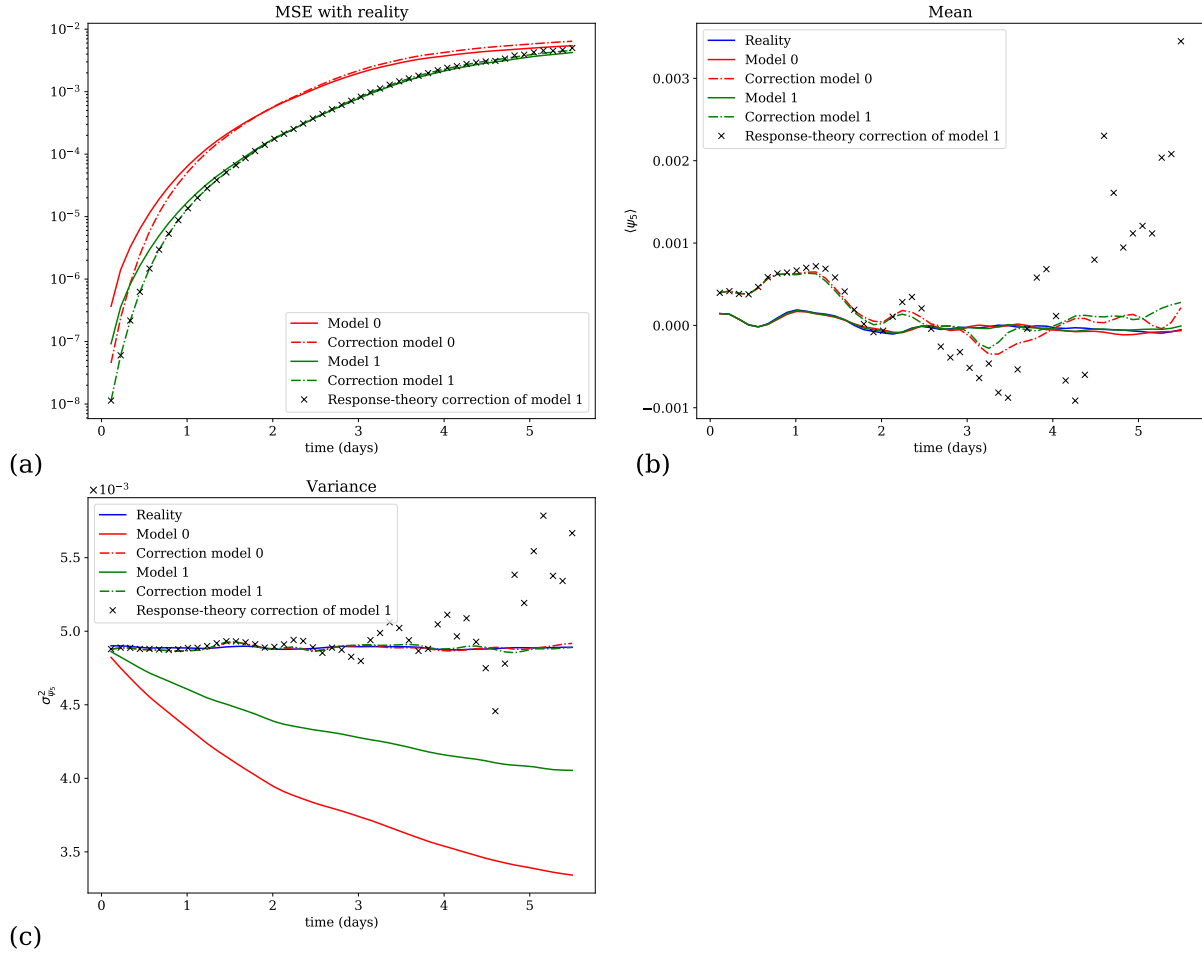

### 1.5.3 Comparison of the efficiency of the response theory correction for different numbers $m$ of trajectories

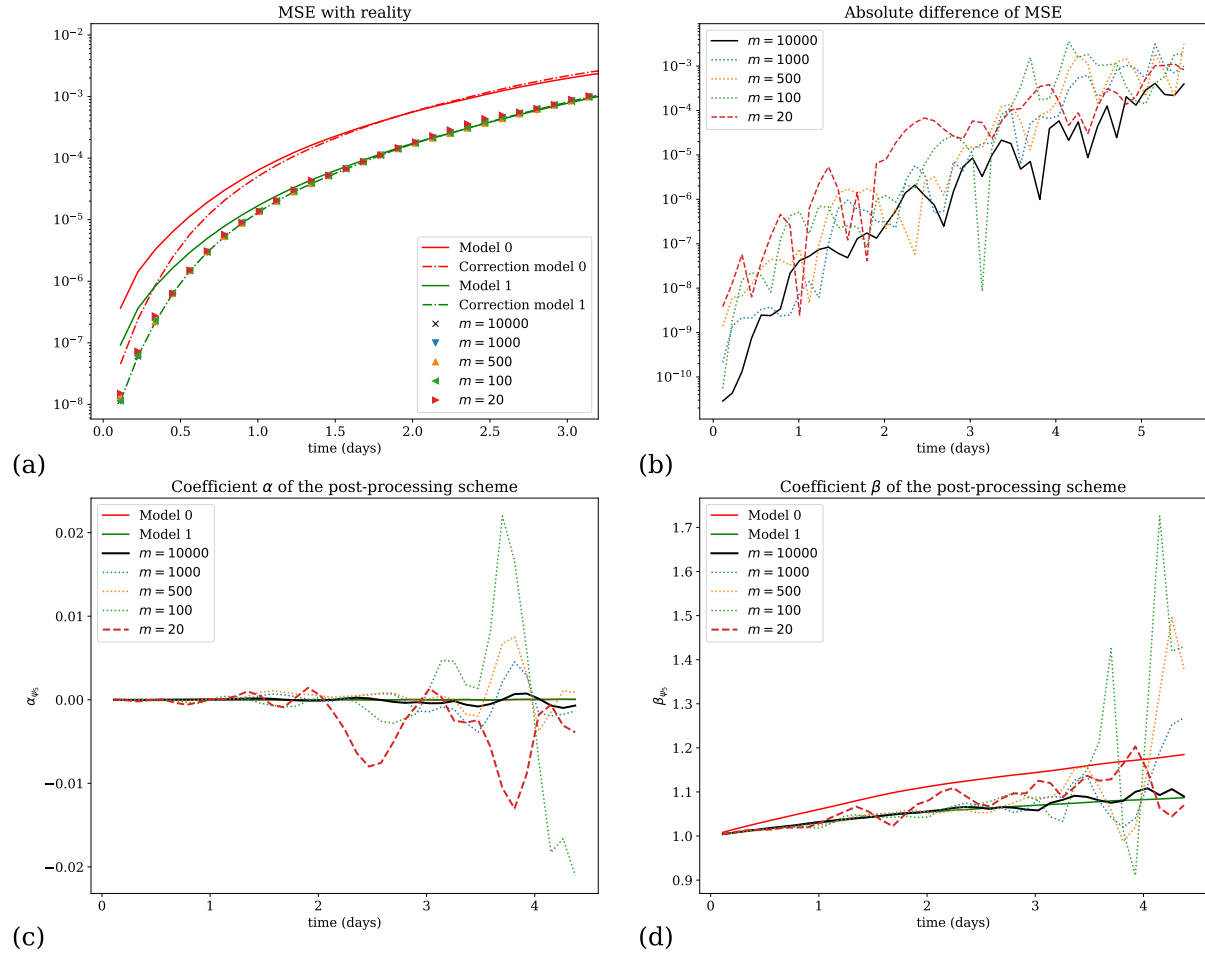

## 1.6 Variable $\psi_6$

### 1.6.1 Corrections of the moments of the variable

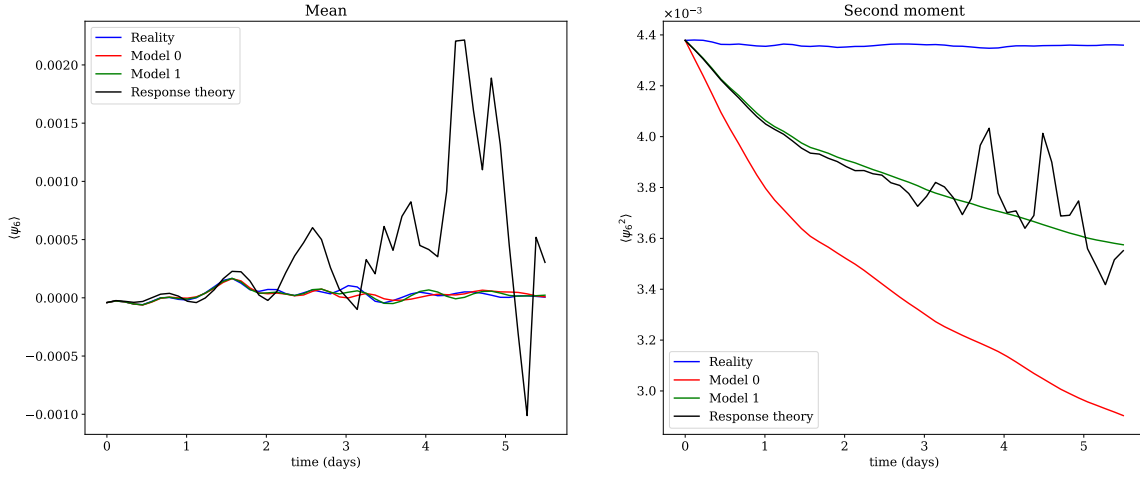

### 1.6.2 Performance of the correction

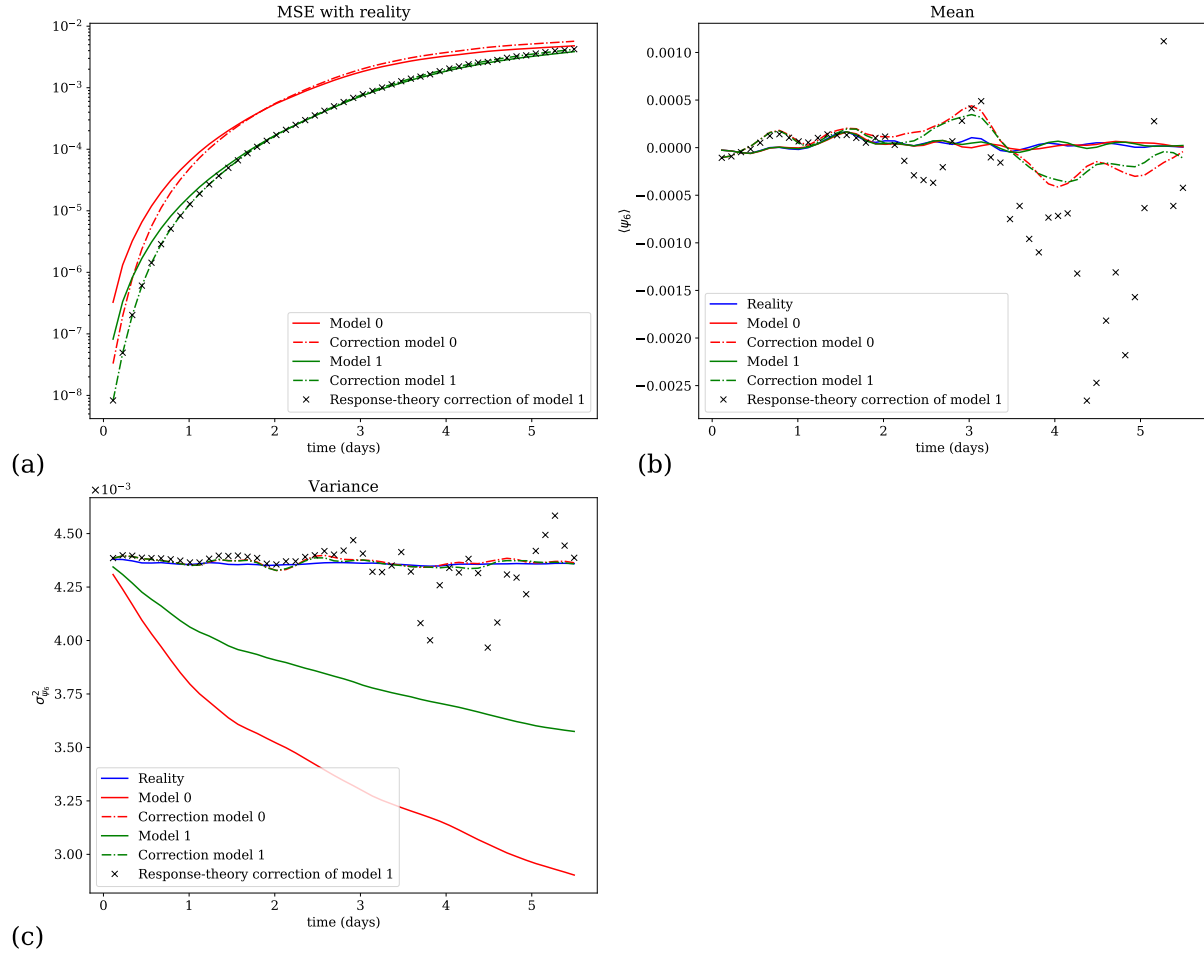

### 1.6.3 Comparison of the efficiency of the response theory correction for different numbers $m$ of trajectories

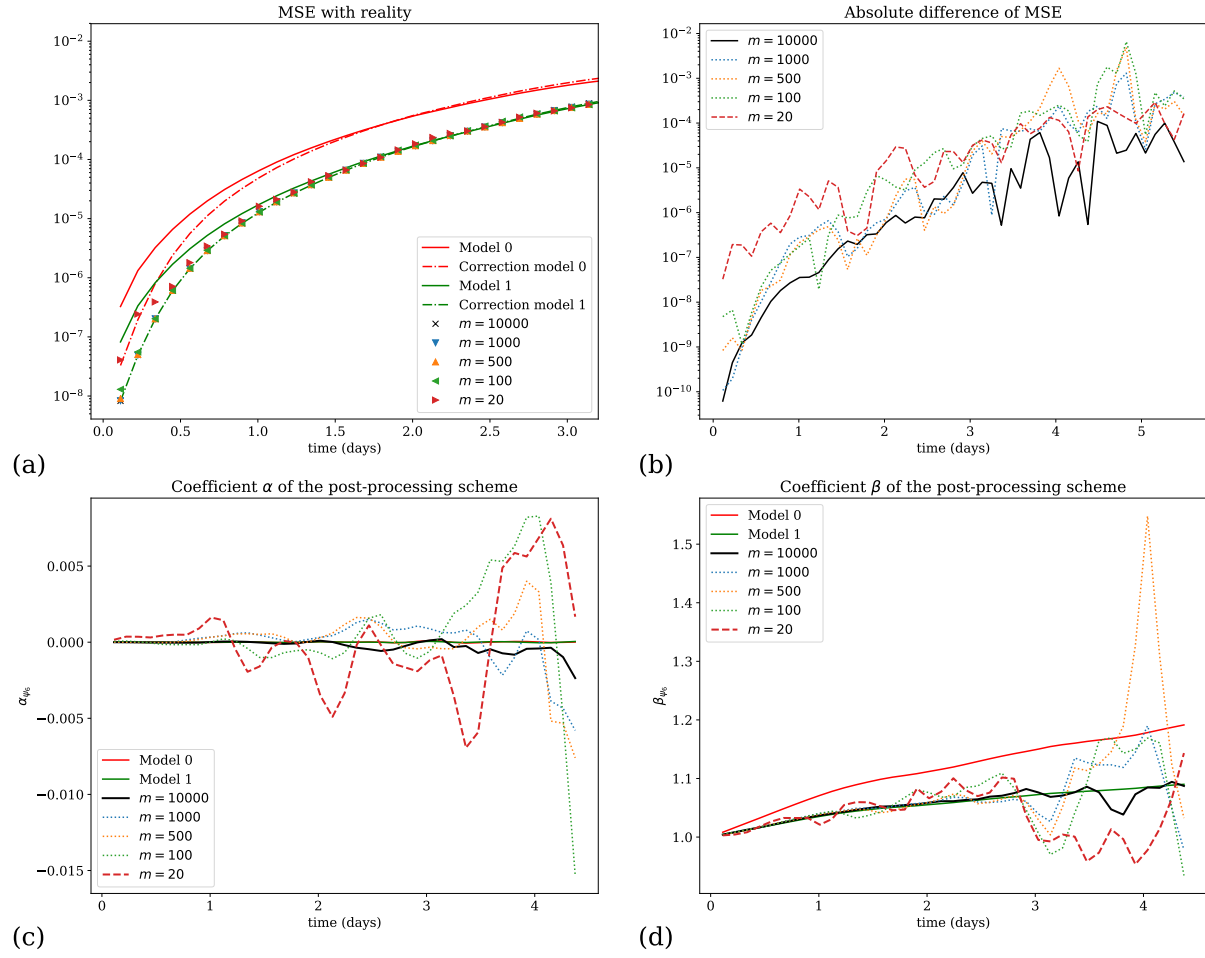

## 1.7 Variable $\psi_7$

### 1.7.1 Corrections of the moments of the variable

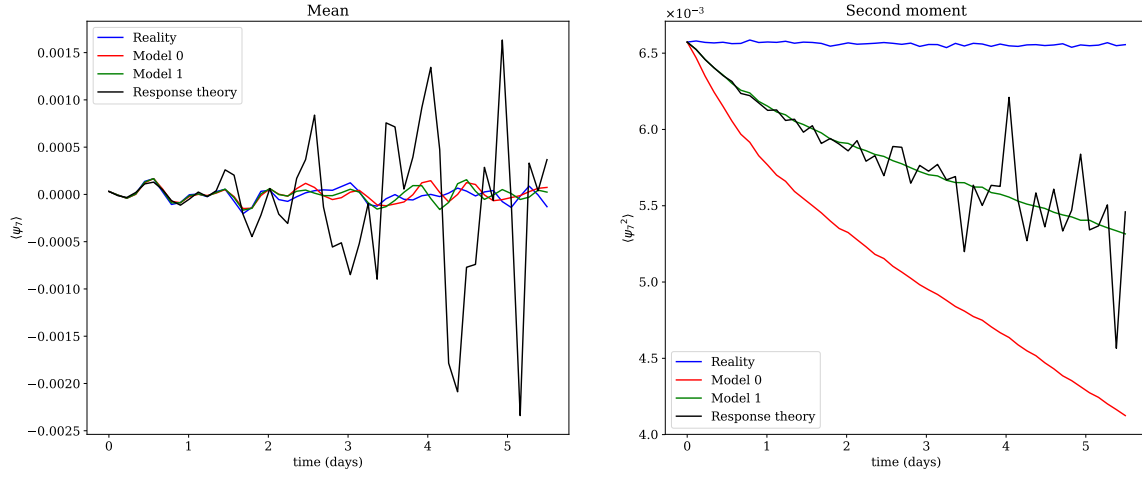

### 1.7.2 Performance of the correction

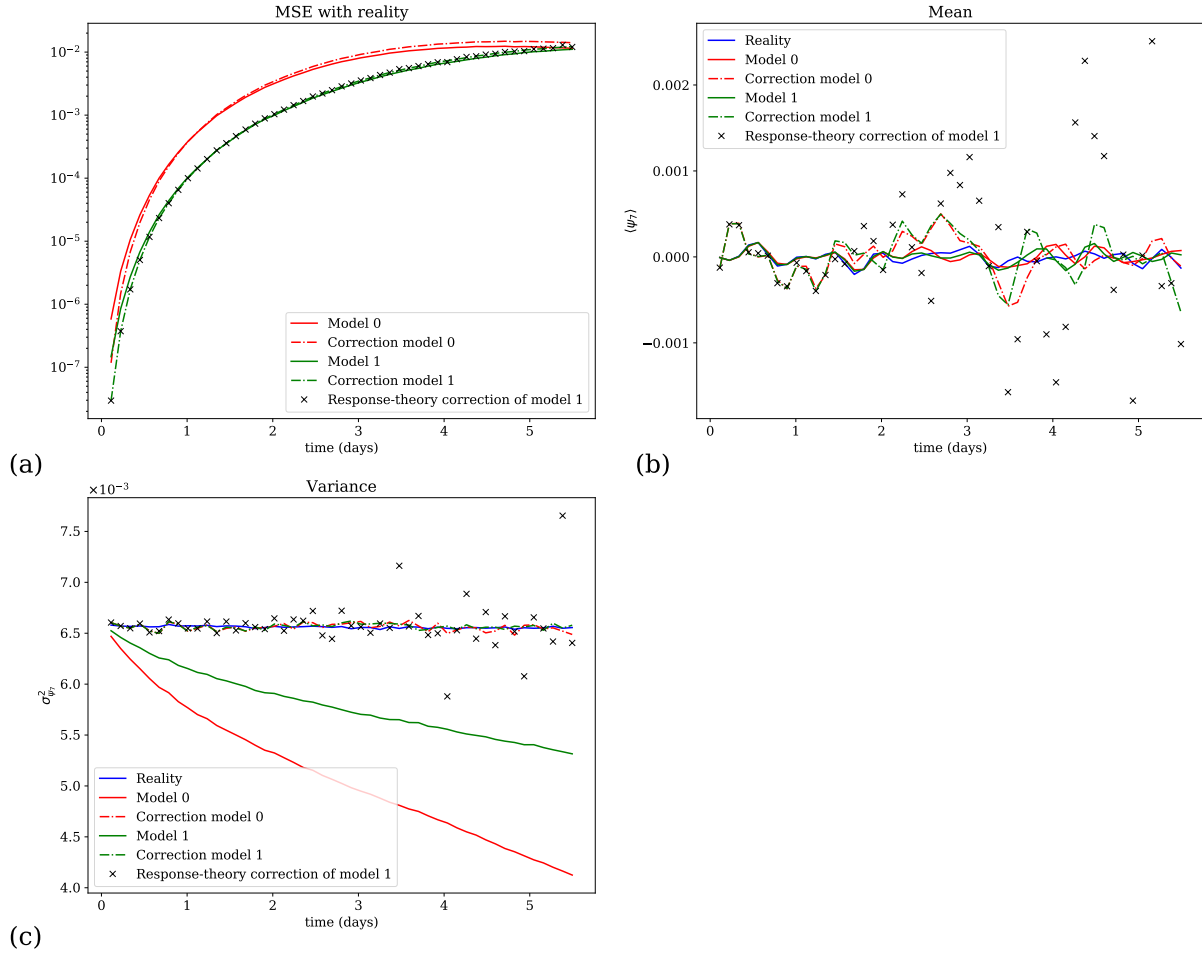

### 1.7.3 Comparison of the efficiency of the response theory correction for different numbers $m$ of trajectories

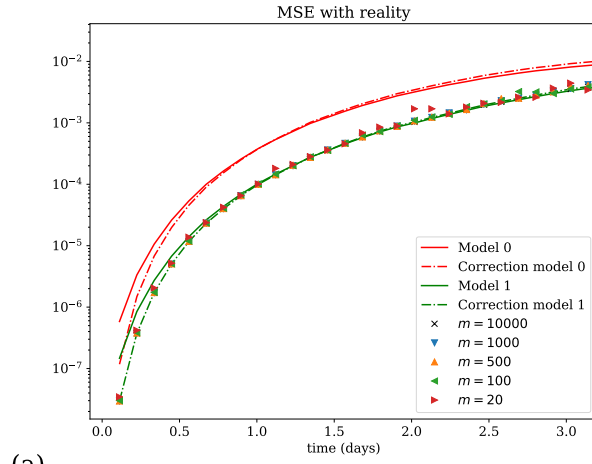

(a)

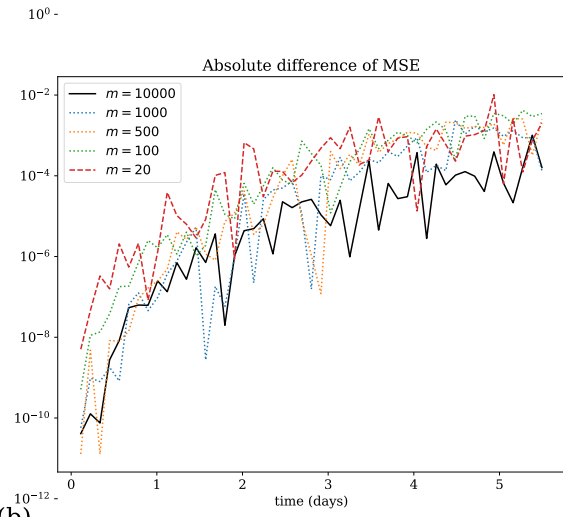

(b)

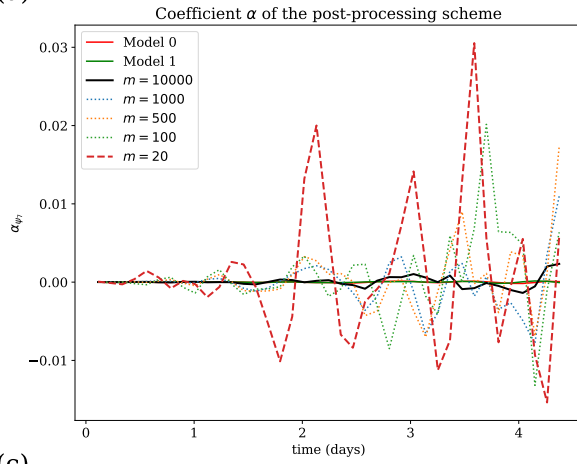

(c)

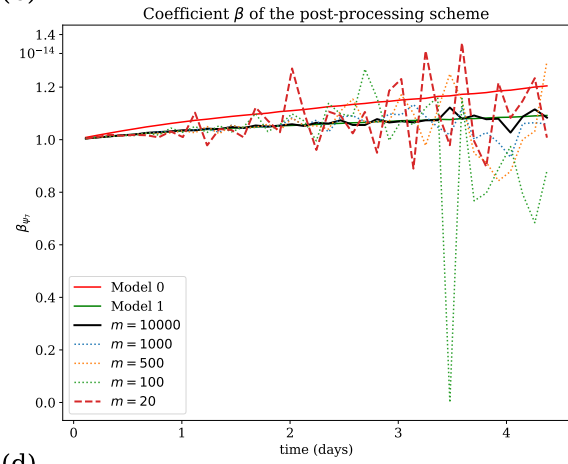

(d)



## 1.8 Variable $\psi_8$

### 1.8.1 Corrections of the moments of the variable

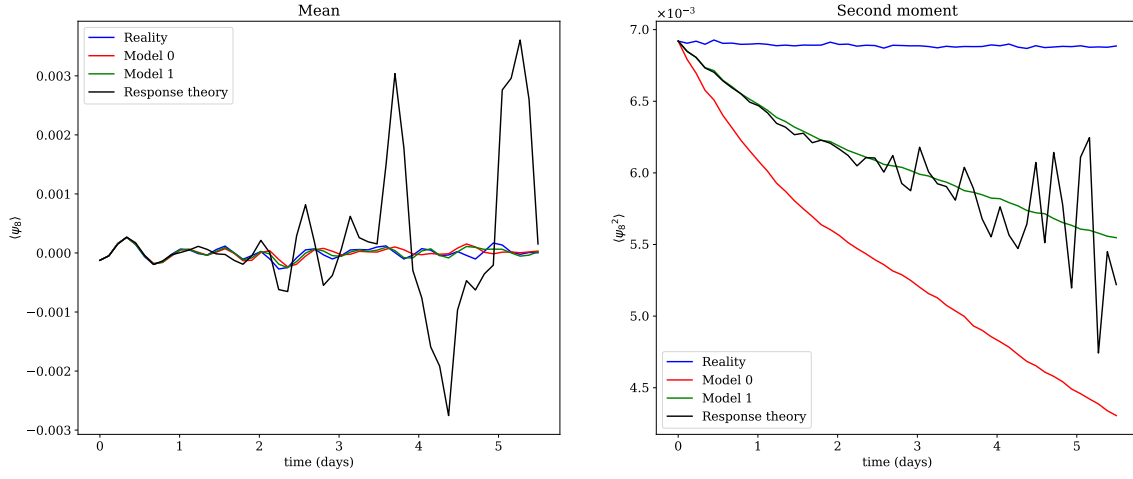

### 1.8.2 Performance of the correction

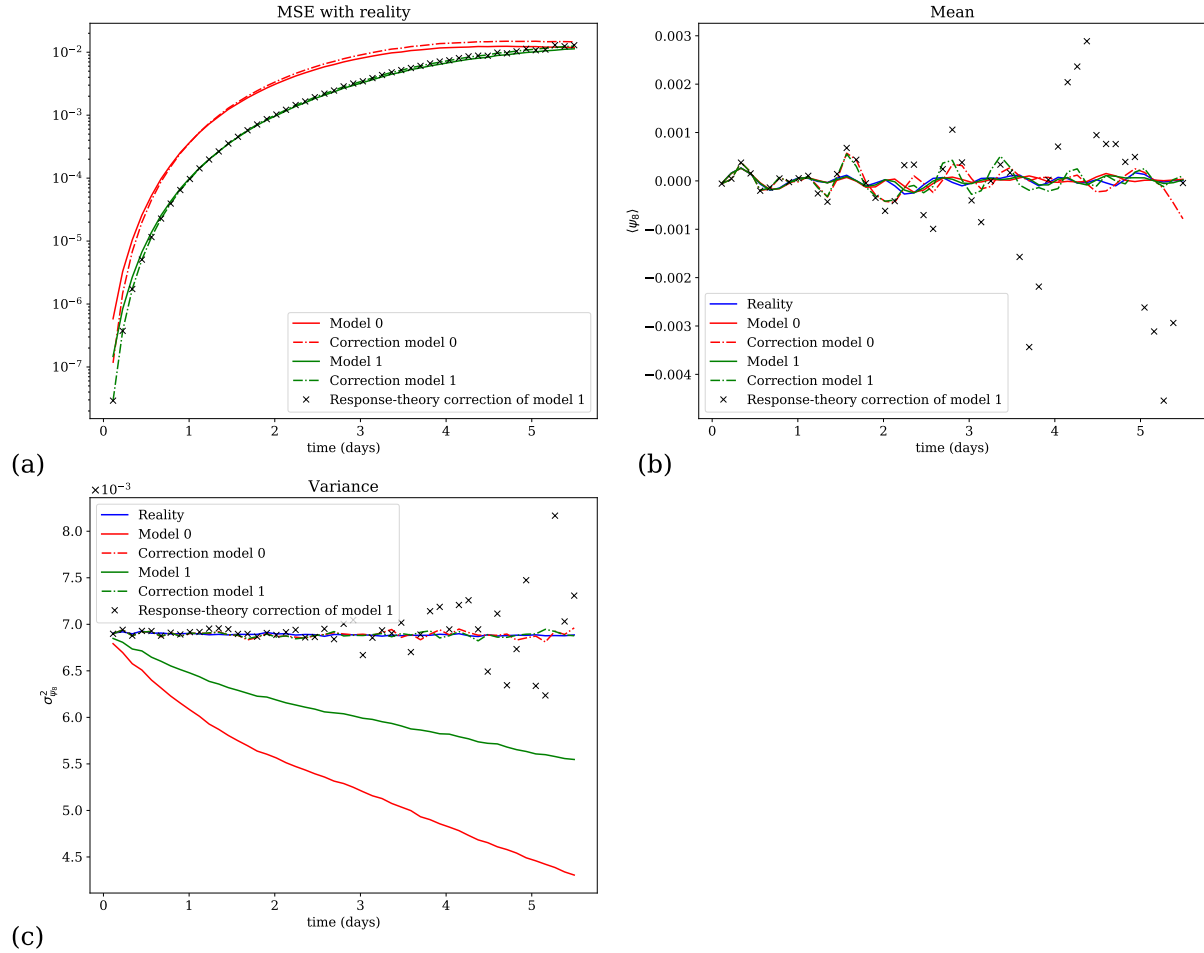

### 1.8.3 Comparison of the efficiency of the response theory correction for different numbers $m$ of trajectories

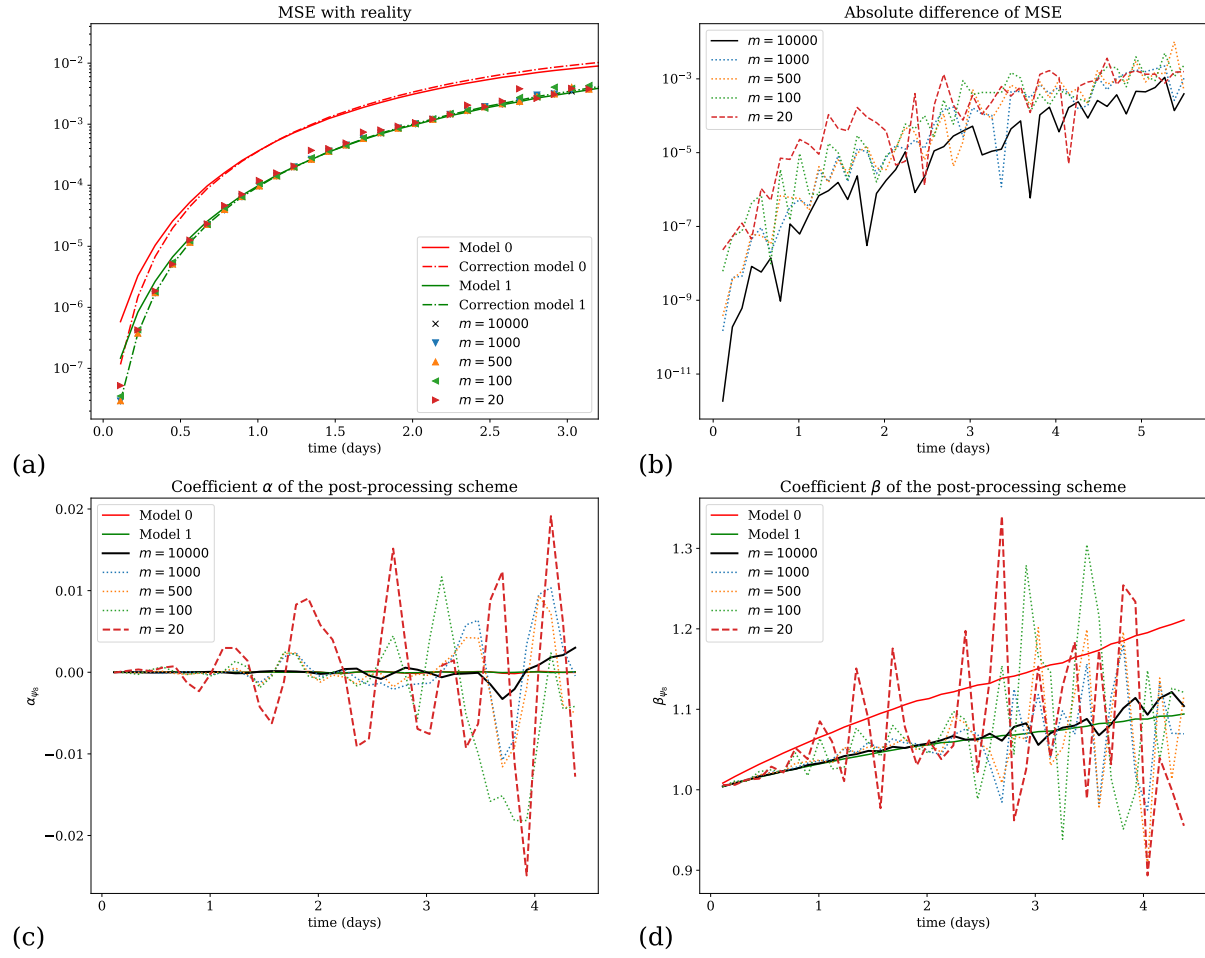

## 1.9 Variable $\psi_9$

### 1.9.1 Corrections of the moments of the variable

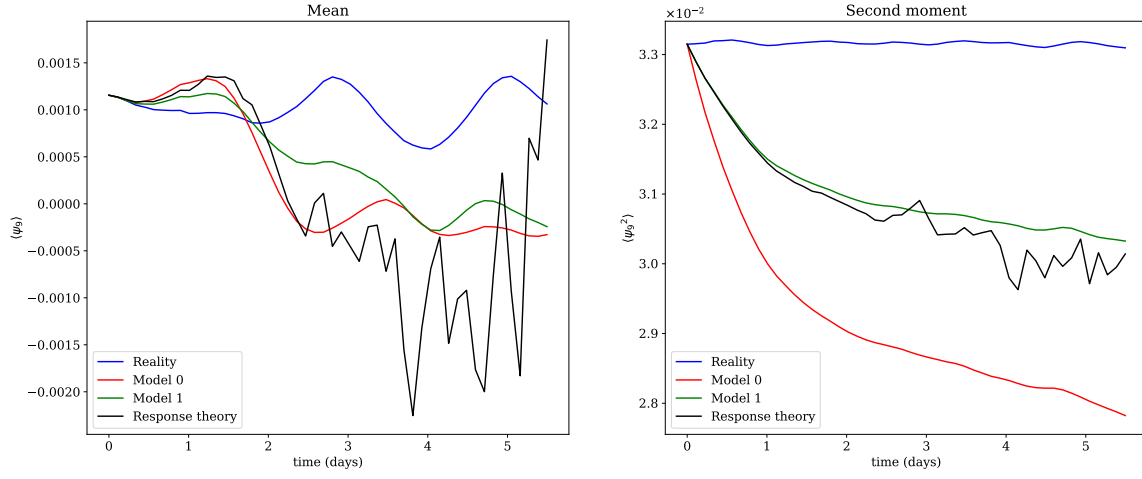

### 1.9.2 Performance of the correction

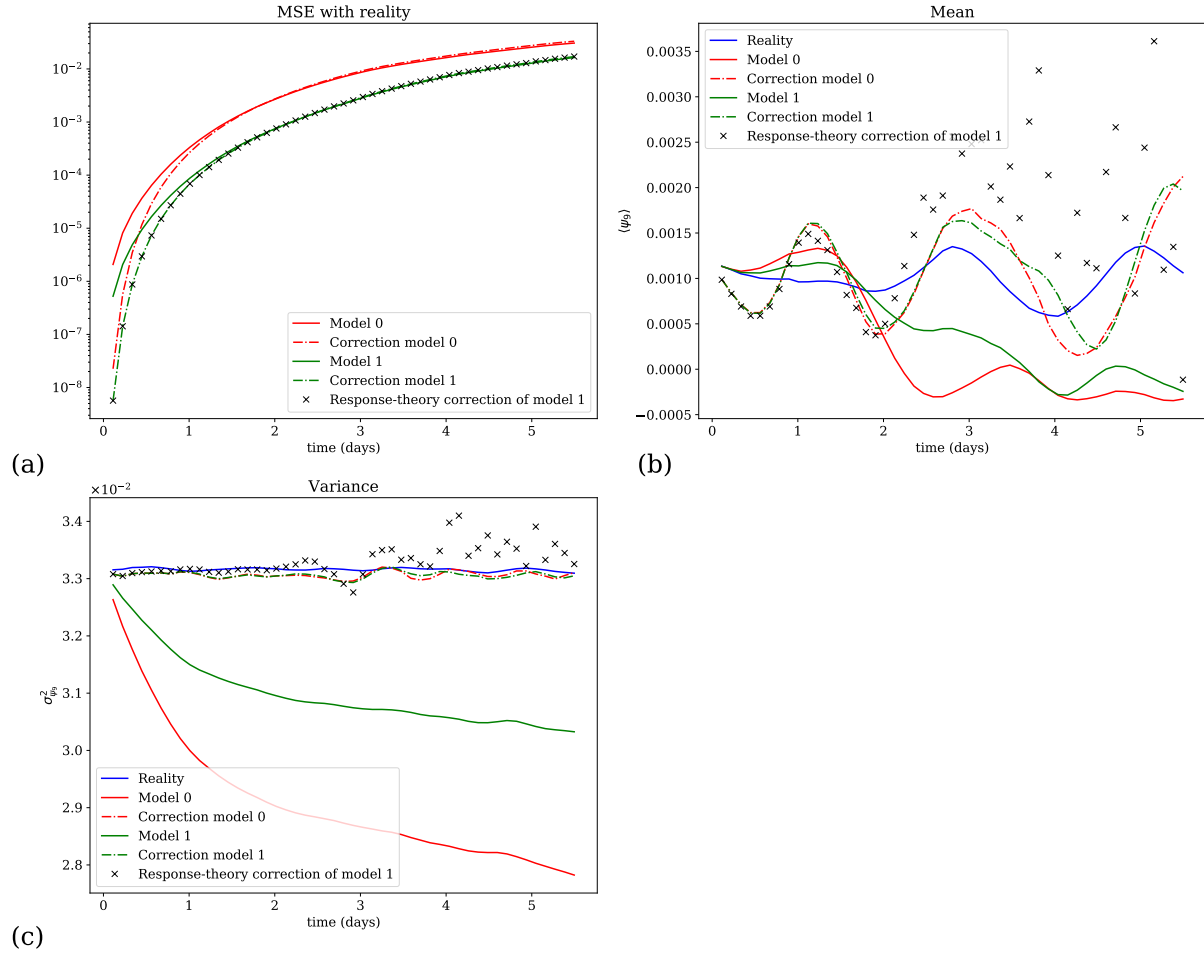

### 1.9.3 Comparison of the efficiency of the response theory correction for different numbers $m$ of trajectories

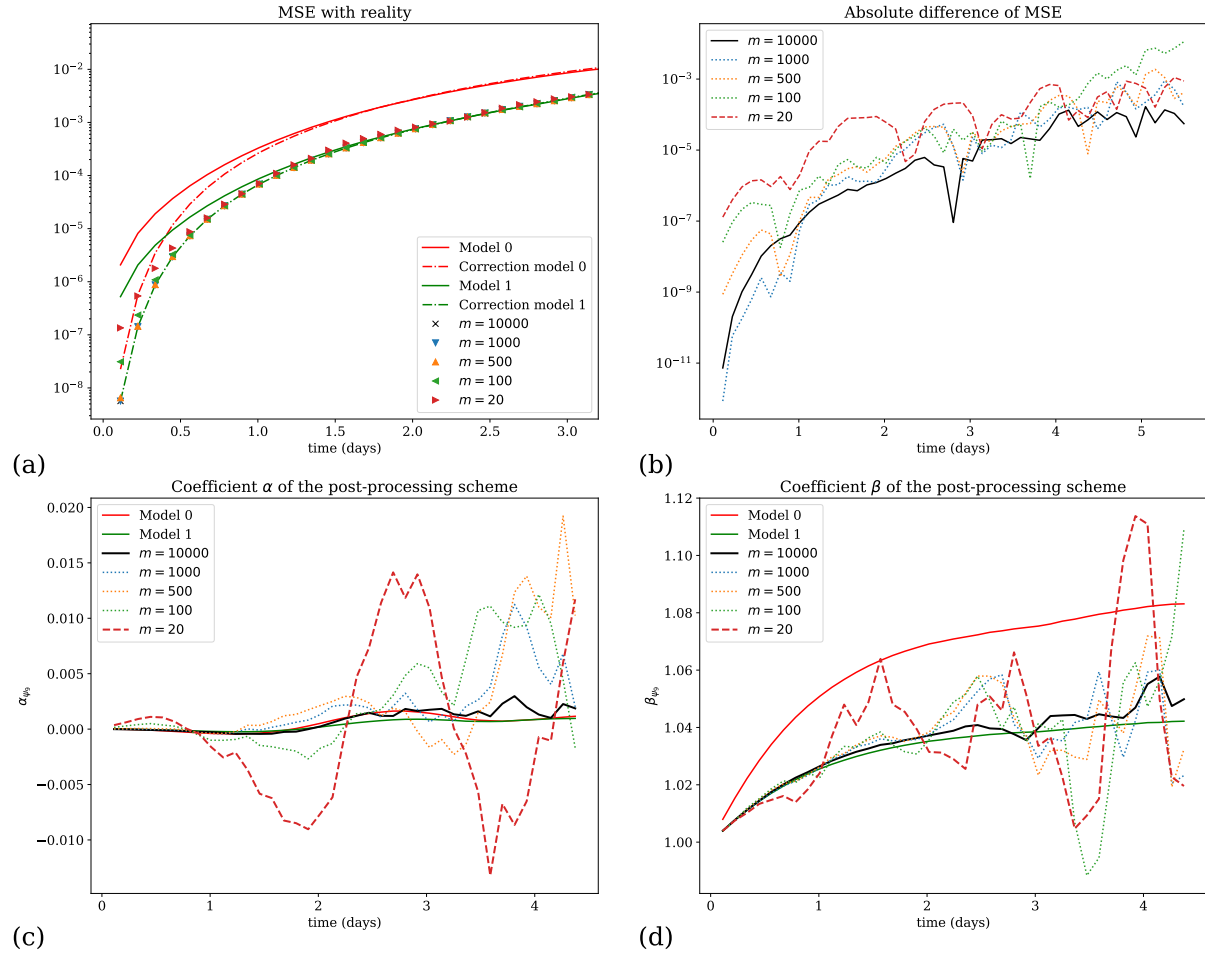

## 1.10 Variable $\psi_{10}$

### 1.10.1 Corrections of the moments of the variable

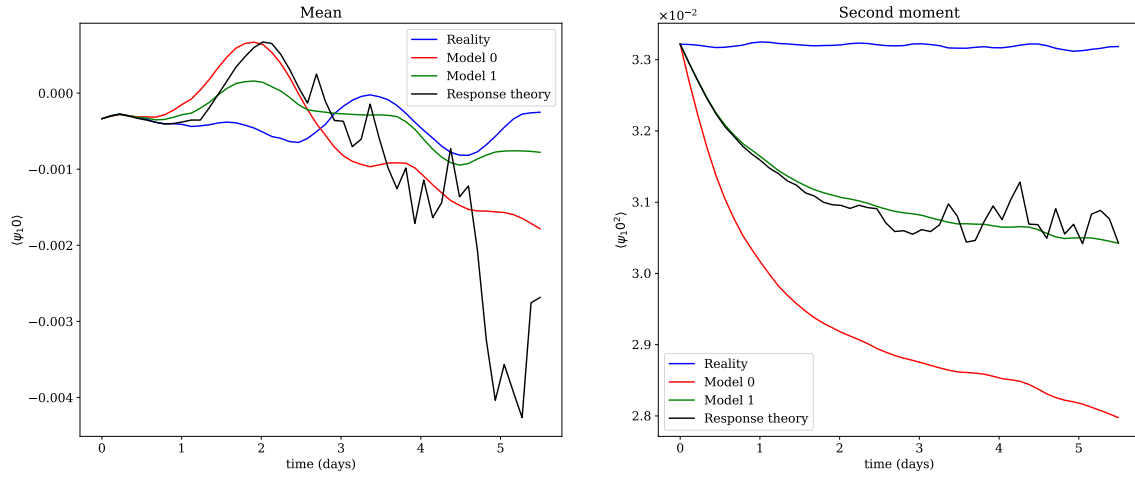

### 1.10.2 Performance of the correction

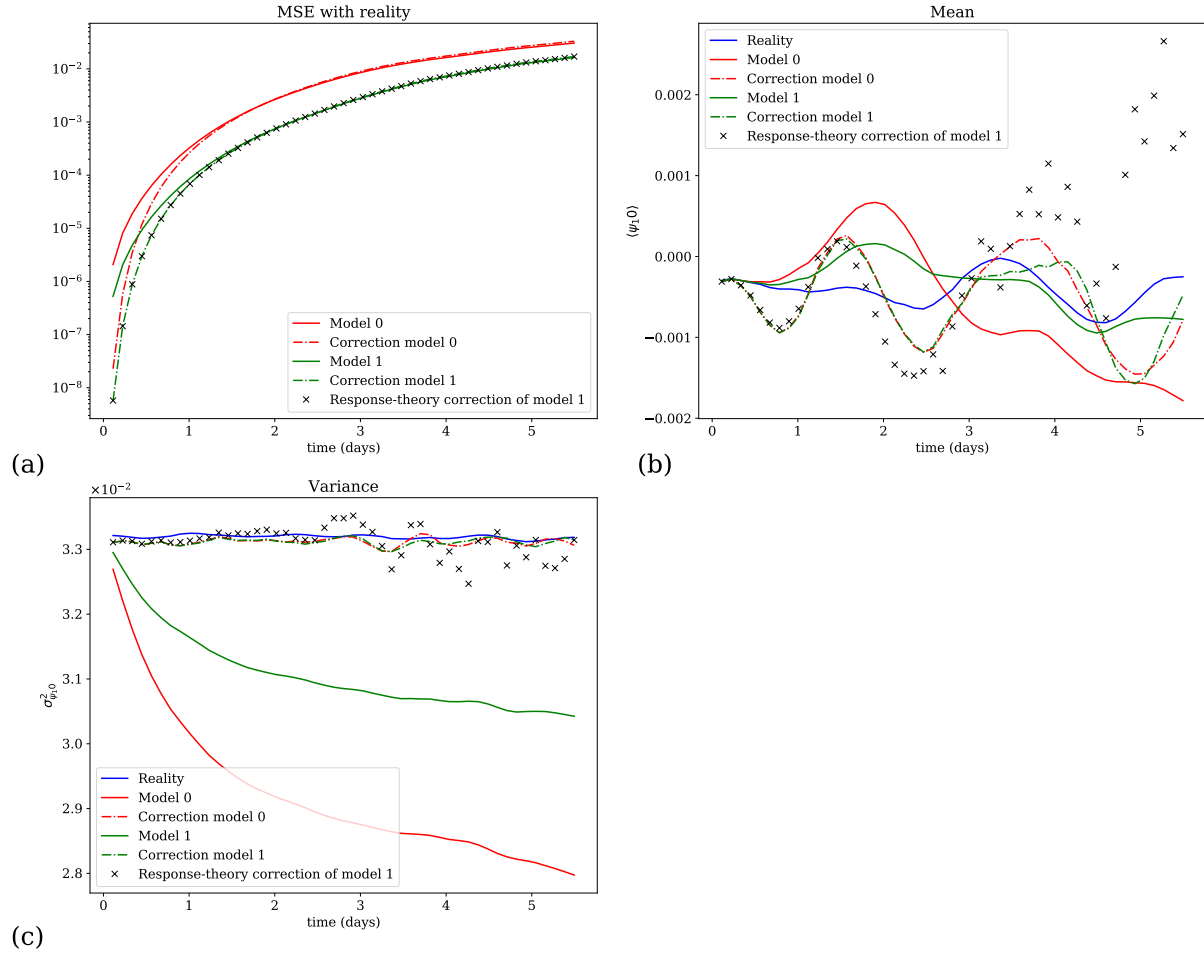

### 1.10.3 Comparison of the efficiency of the response theory correction for different numbers $m$ of trajectories

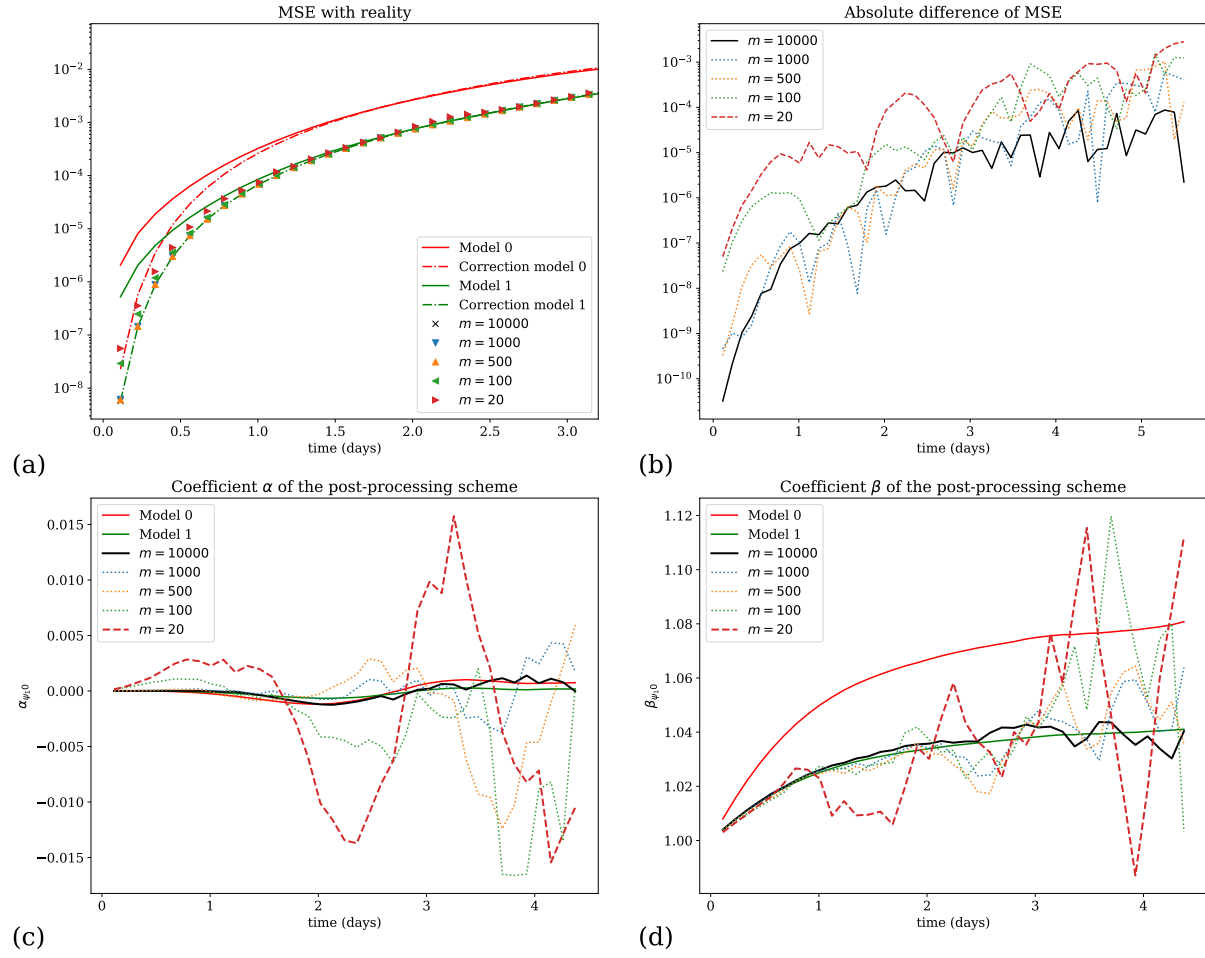

## 1.11 Variable $\theta_1$

### 1.11.1 Corrections of the moments of the variable

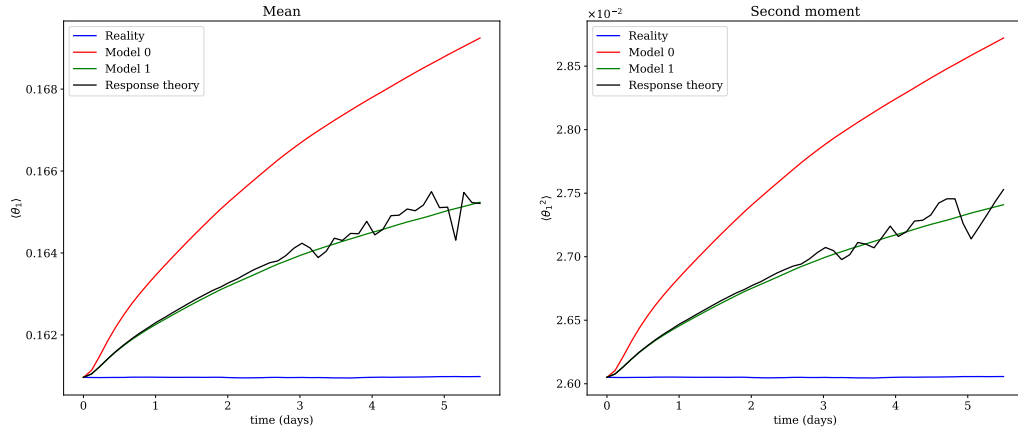

### 1.11.2 Performance of the correction

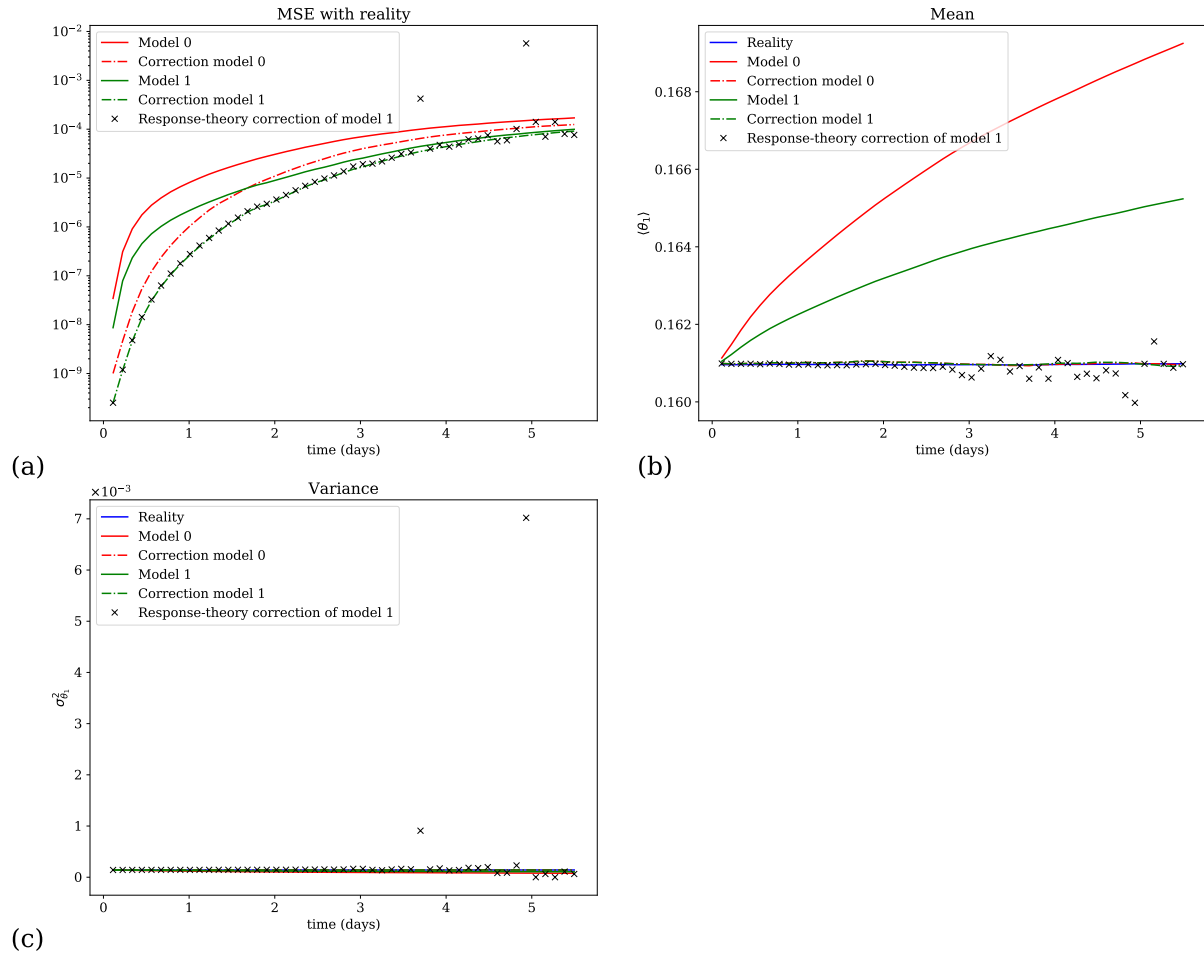

### 1.11.3 Comparison of the efficiency of the response theory correction for different numbers $m$ of trajectories

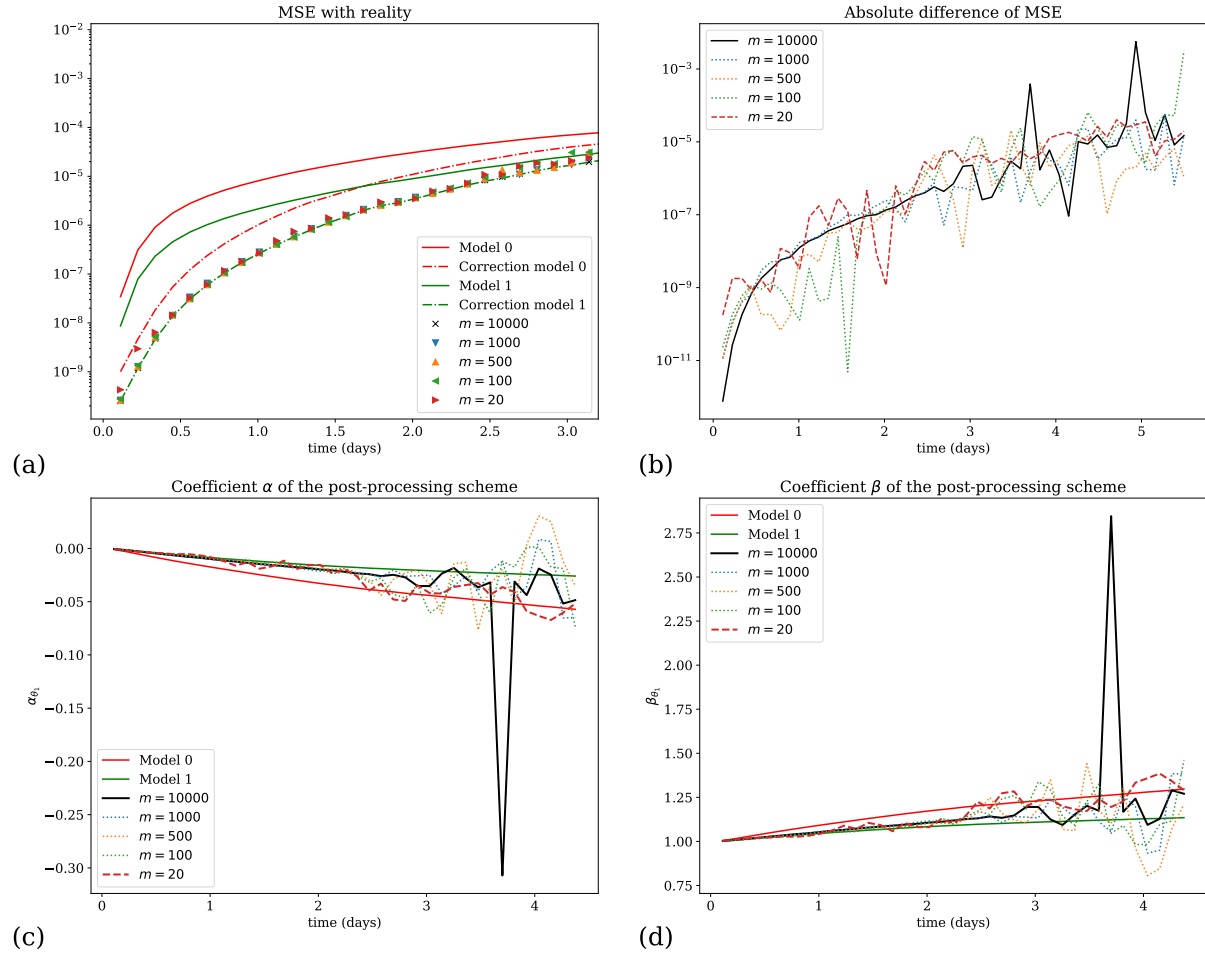



## 1.12 Variable $\theta_2$

### 1.12.1 Corrections of the moments of the variable

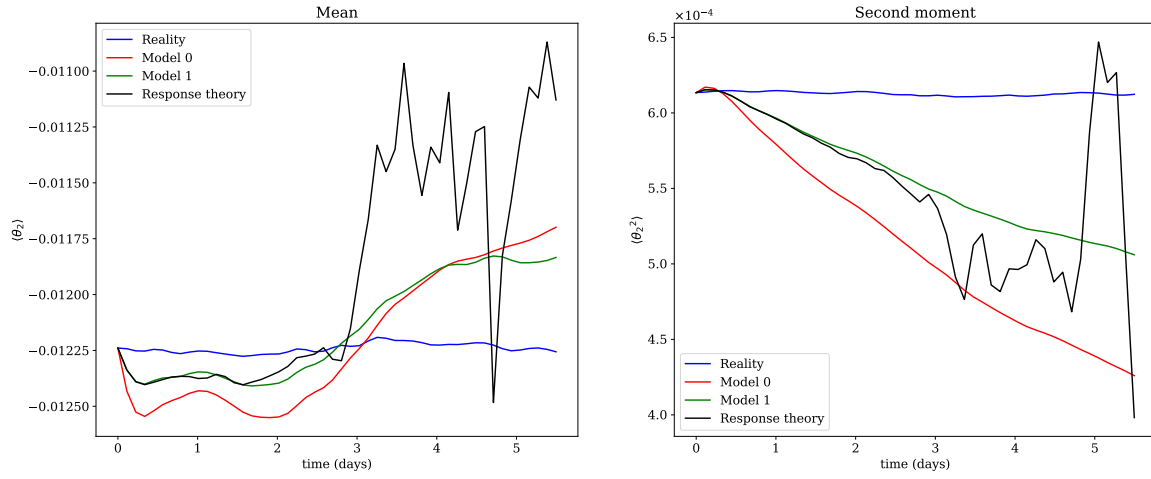

### 1.12.2 Performance of the correction

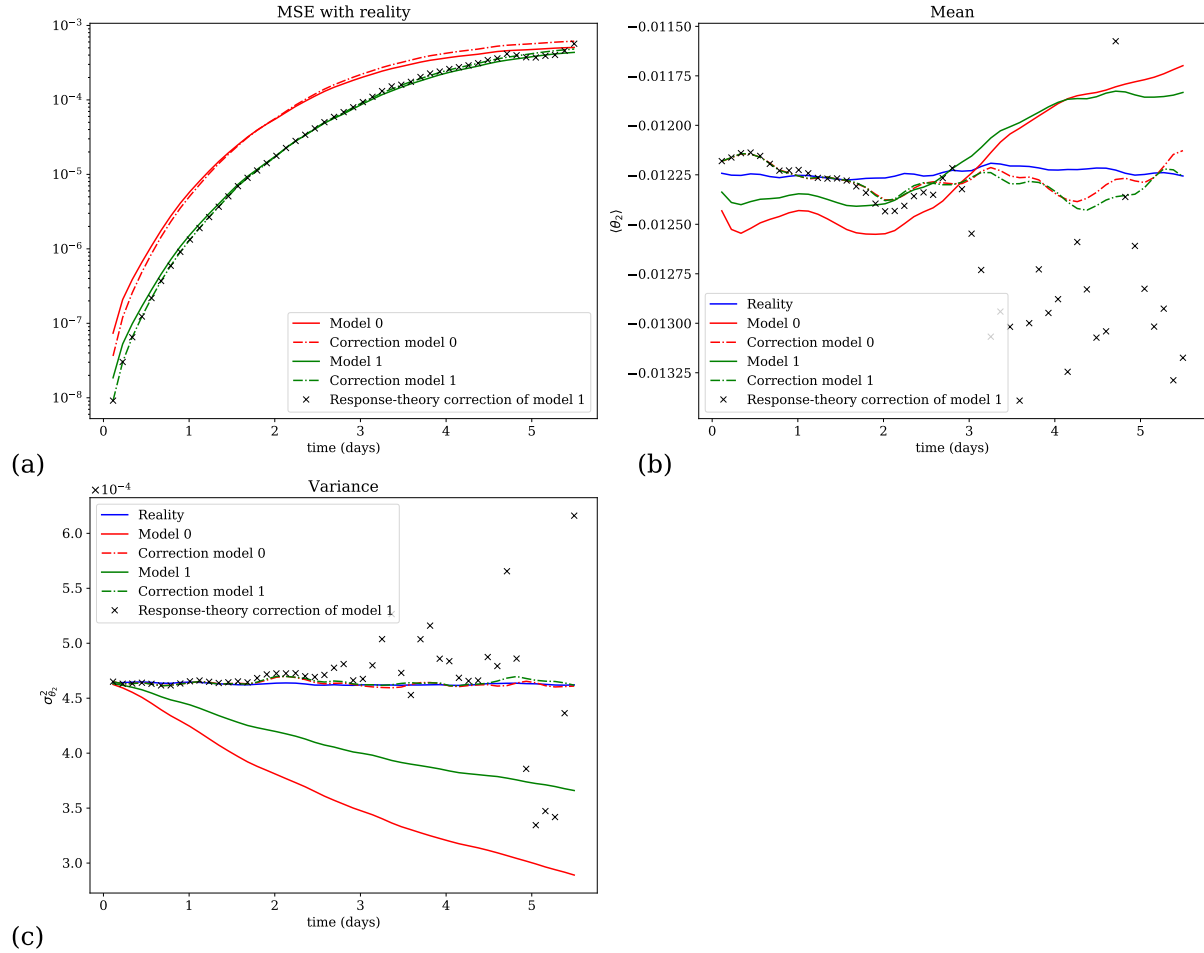

### 1.12.3 Comparison of the efficiency of the response theory correction for different numbers $m$ of trajectories

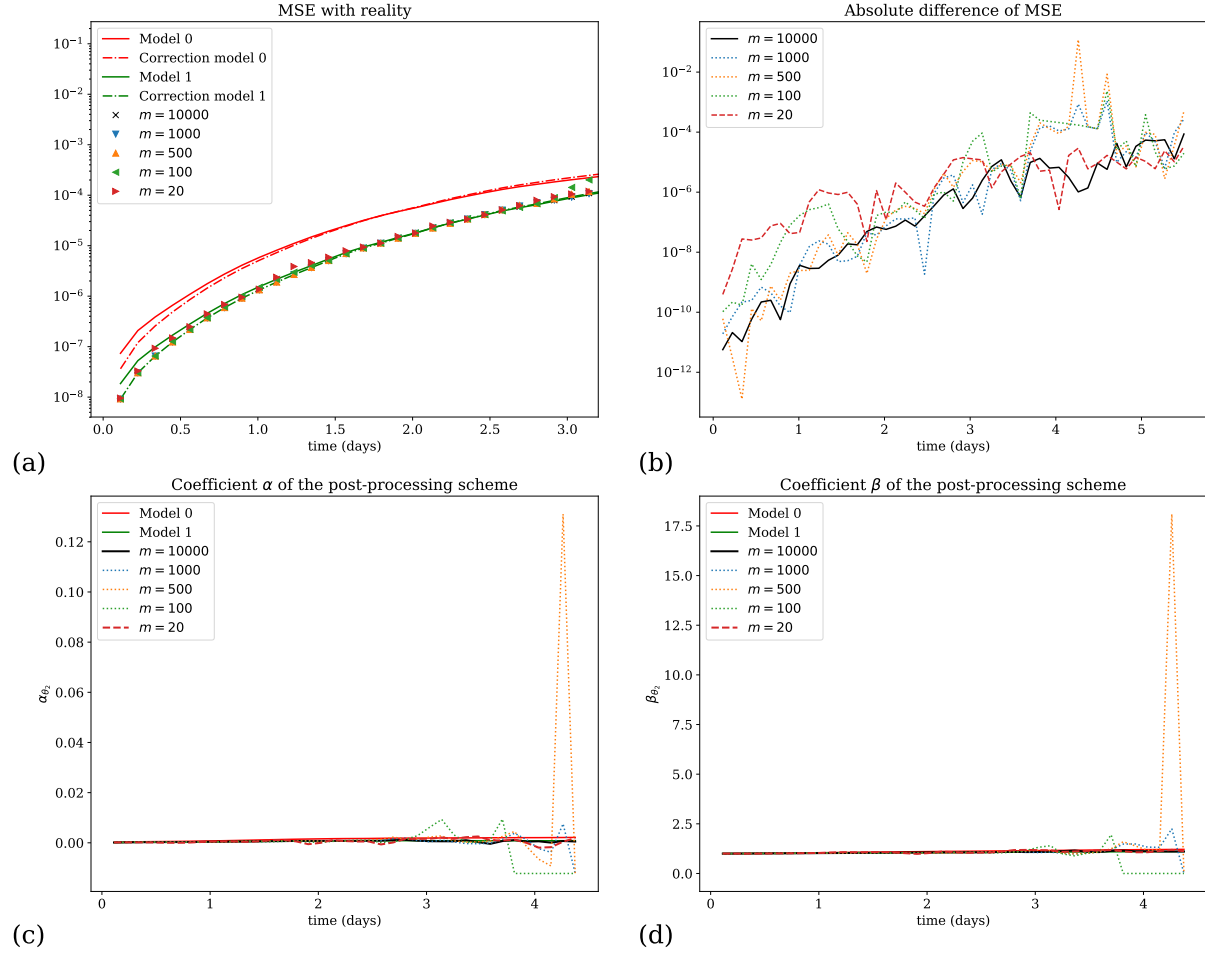

## 1.13 Variable $\theta_3$

### 1.13.1 Corrections of the moments of the variable

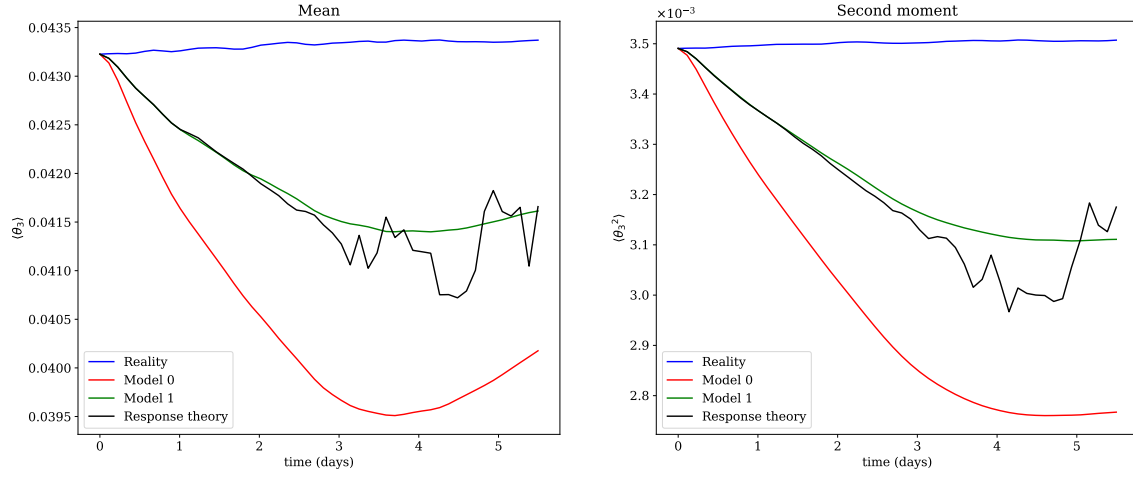

### 1.13.2 Performance of the correction

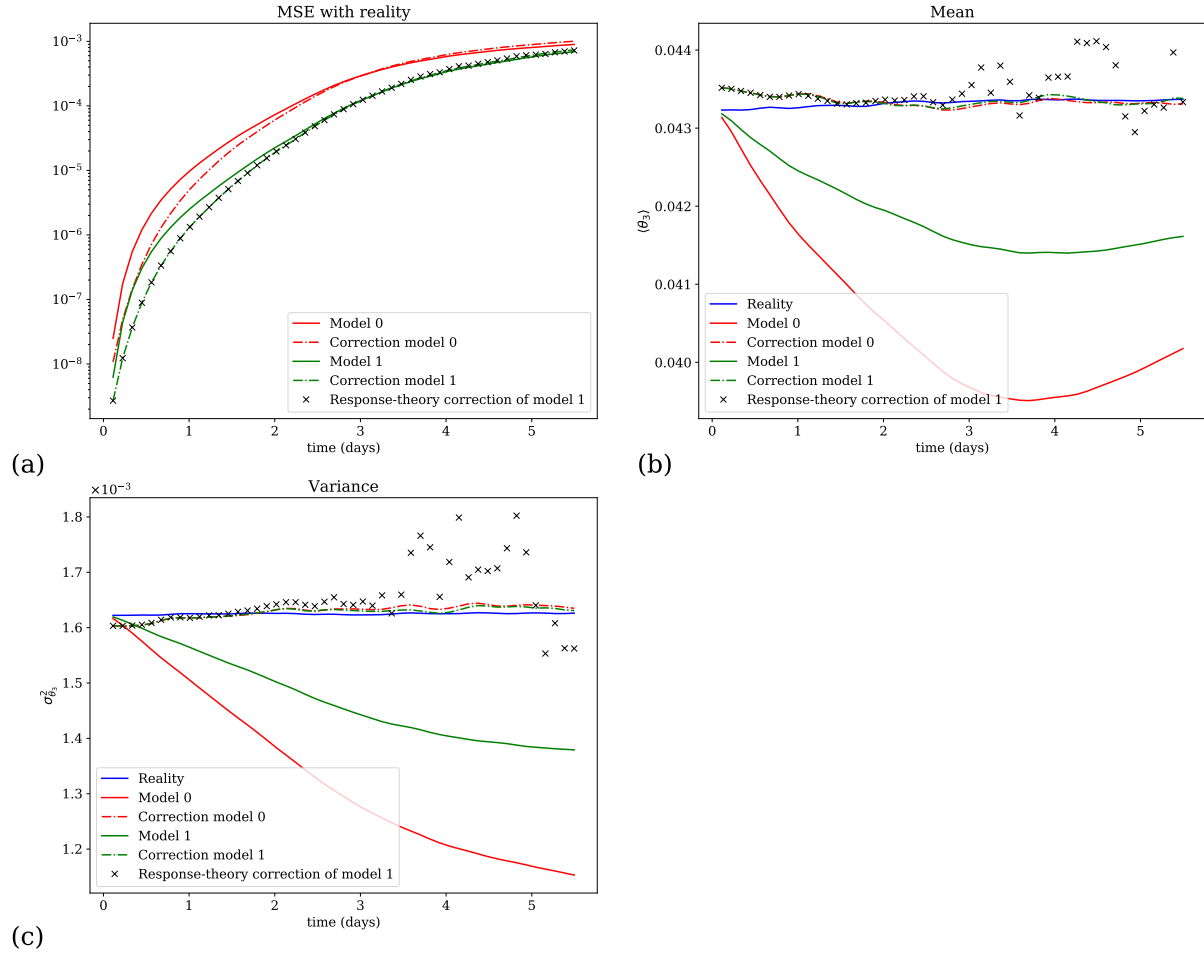

### 1.13.3 Comparison of the efficiency of the response theory correction for different numbers $m$ of trajectories

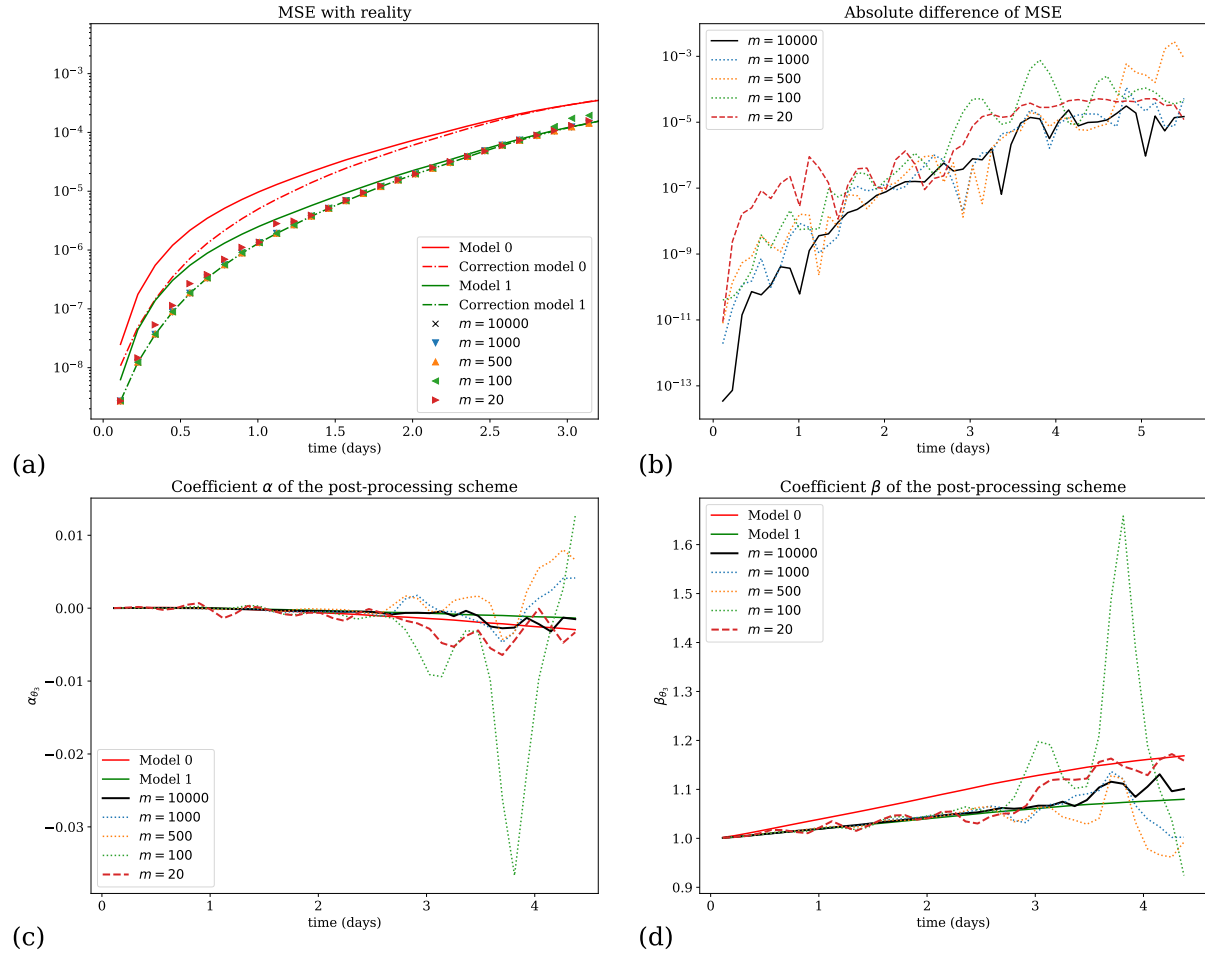

## 1.14 Variable $\theta_4$

### 1.14.1 Corrections of the moments of the variable

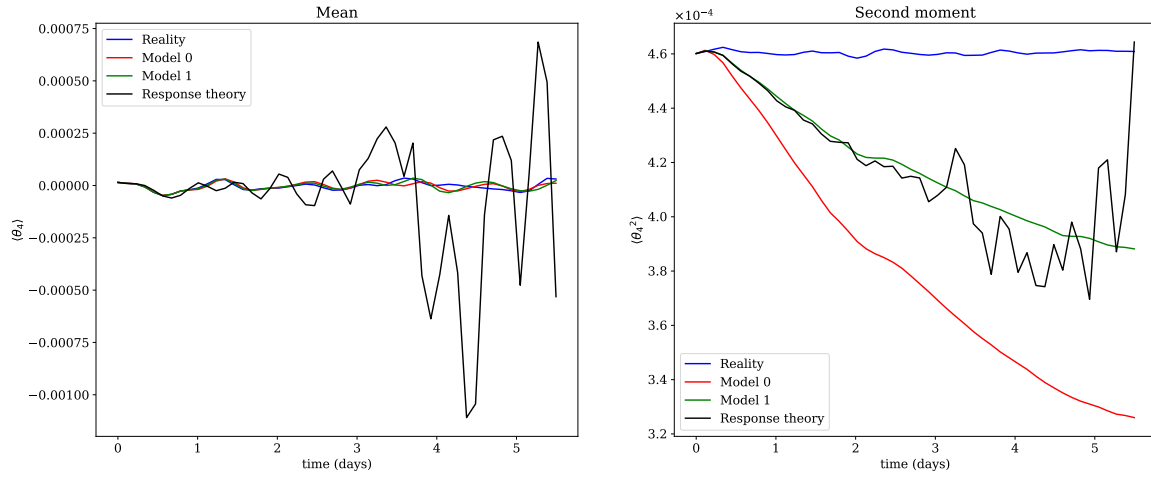

### 1.14.2 Performance of the correction

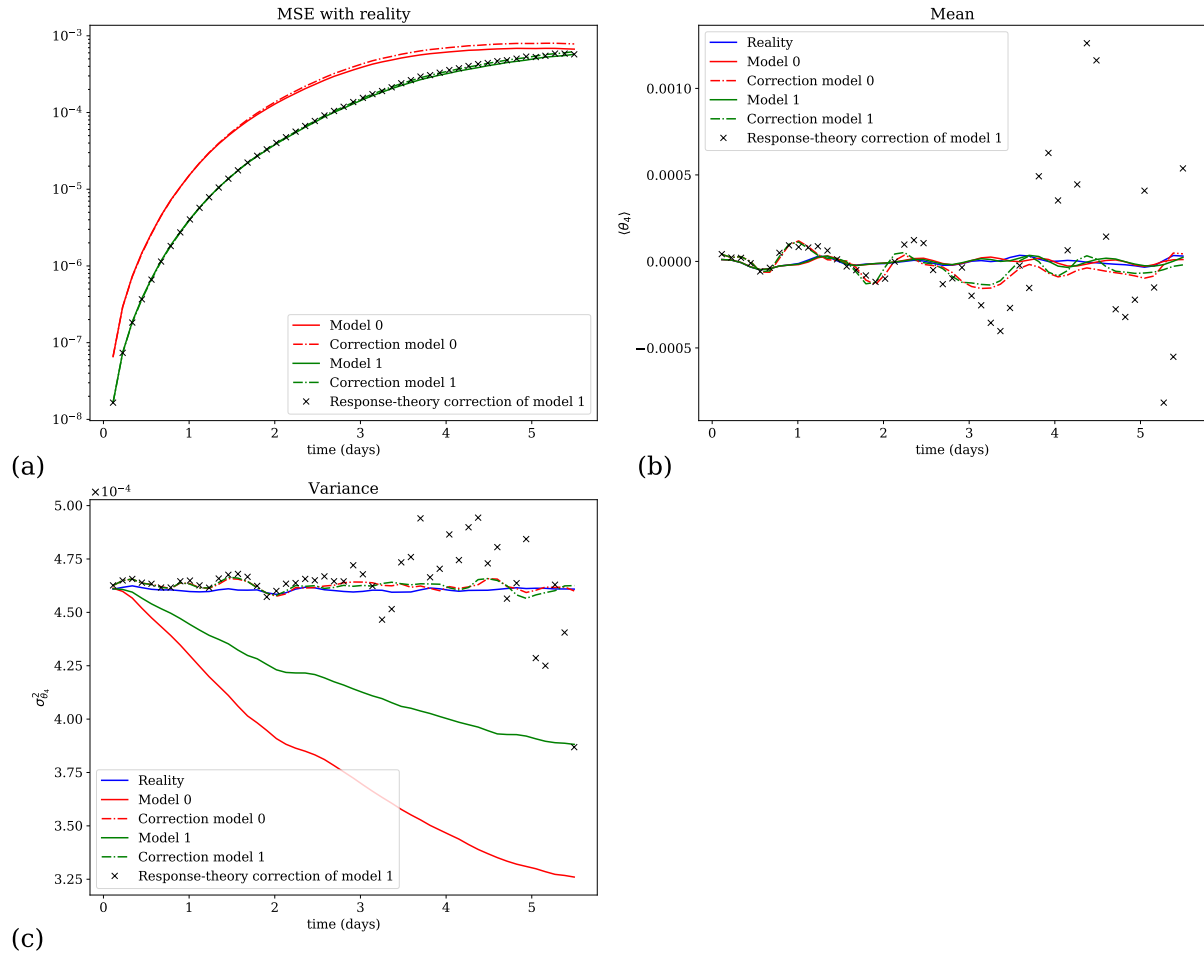

### 1.14.3 Comparison of the efficiency of the response theory correction for different numbers $m$ of trajectories

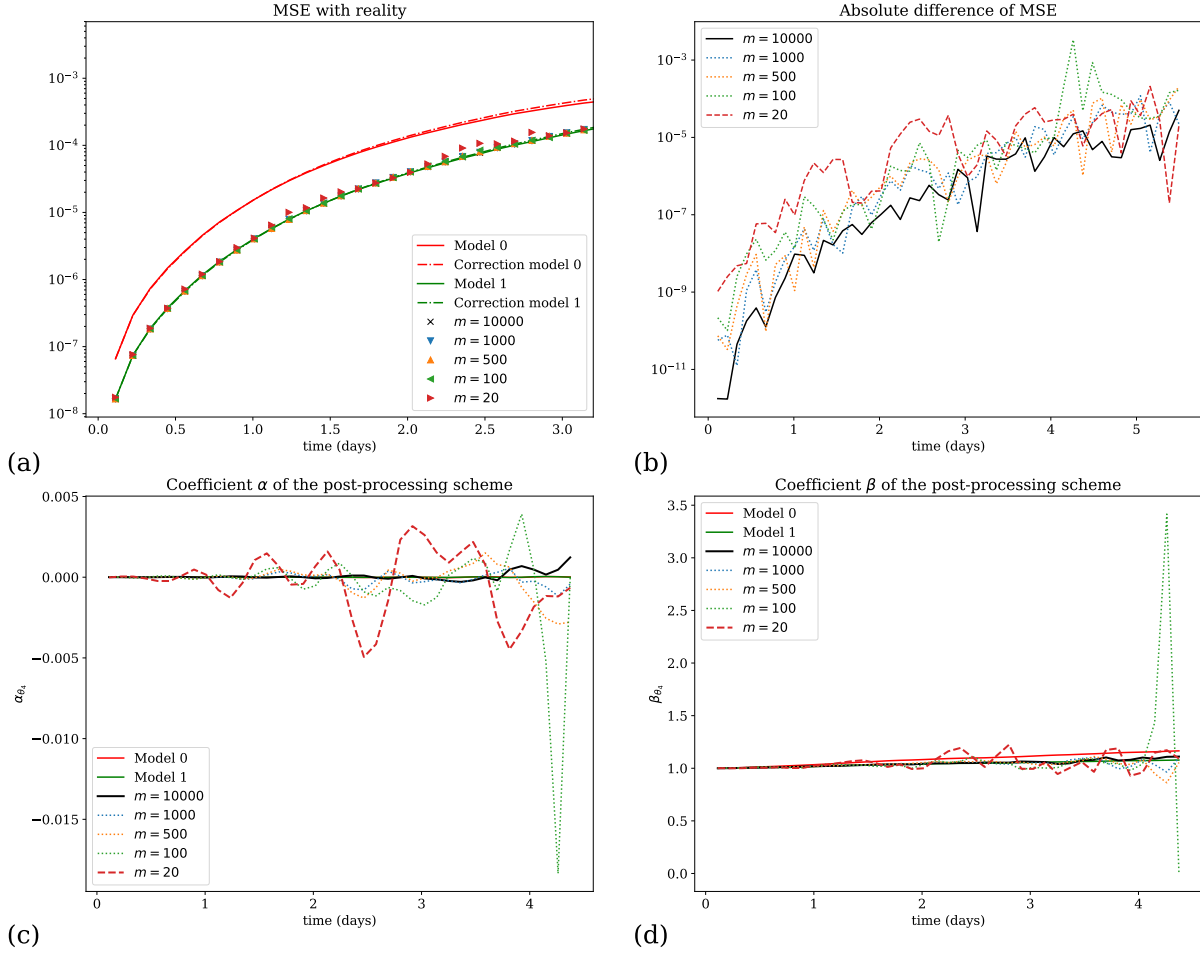

## 1.15 Variable $\theta_5$

### 1.15.1 Corrections of the moments of the variable

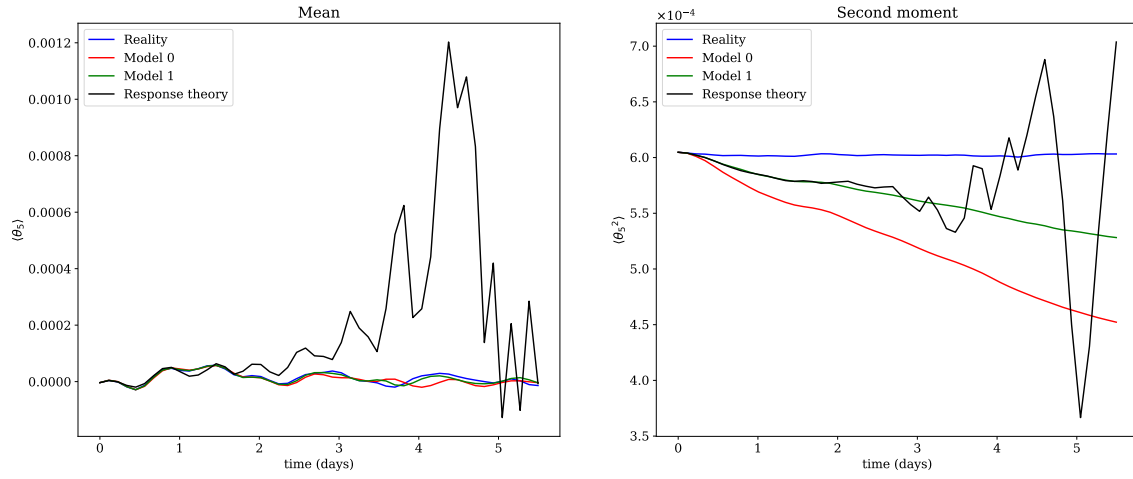

### 1.15.2 Performance of the correction

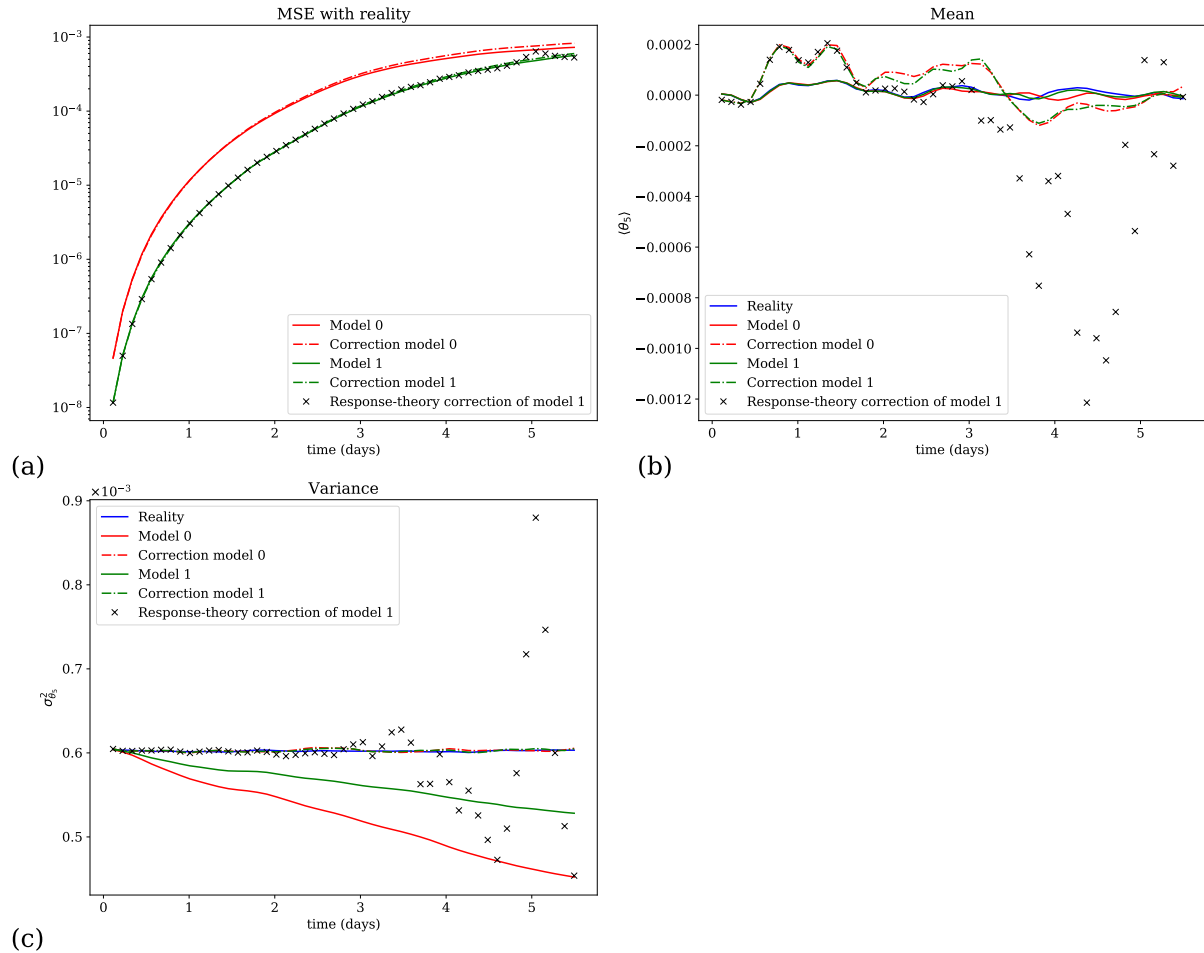

### 1.15.3 Comparison of the efficiency of the response theory correction for different numbers $m$ of trajectories

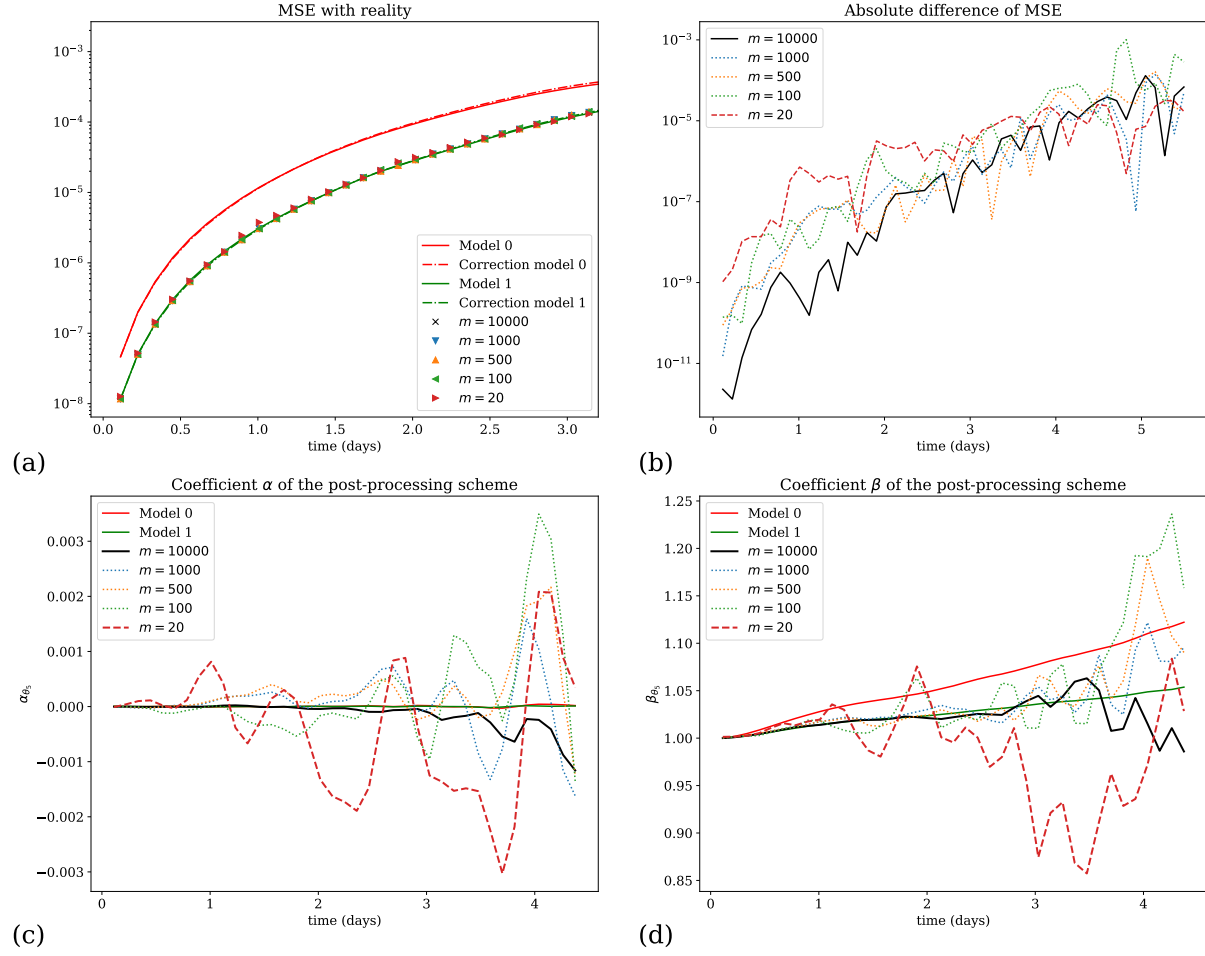



## 1.16 Variable $\theta_6$

### 1.16.1 Corrections of the moments of the variable

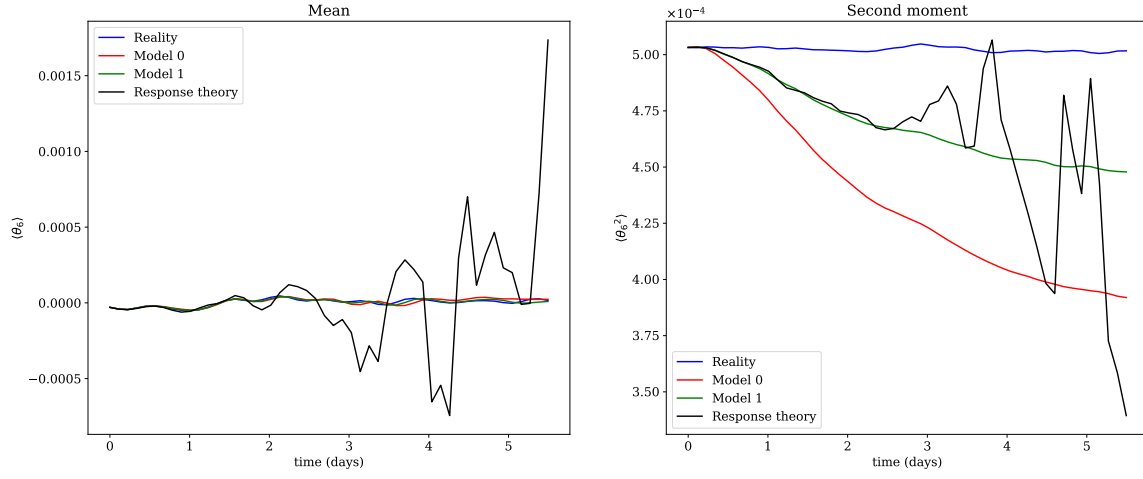

### 1.16.2 Performance of the correction

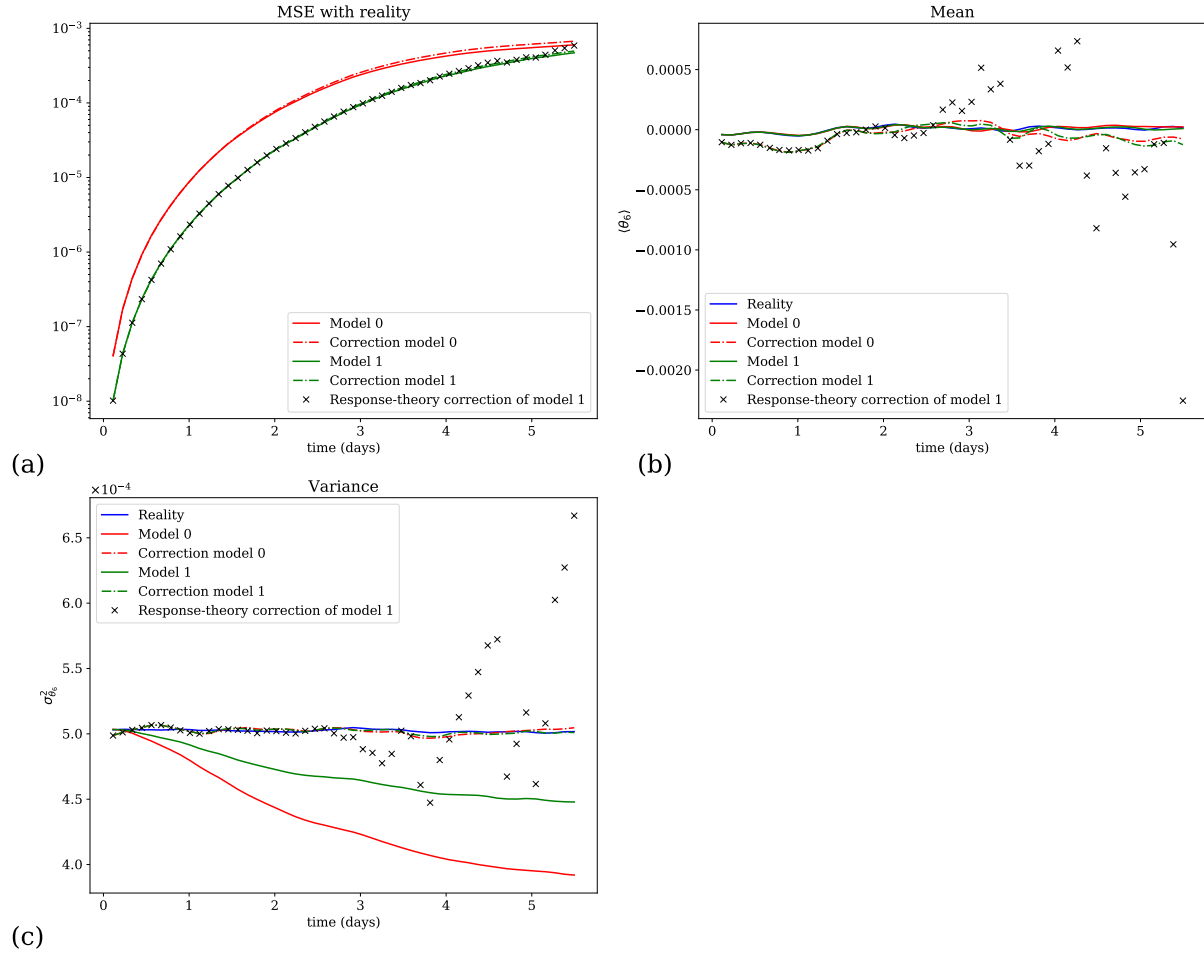

### 1.16.3 Comparison of the efficiency of the response theory correction for different numbers $m$ of trajectories

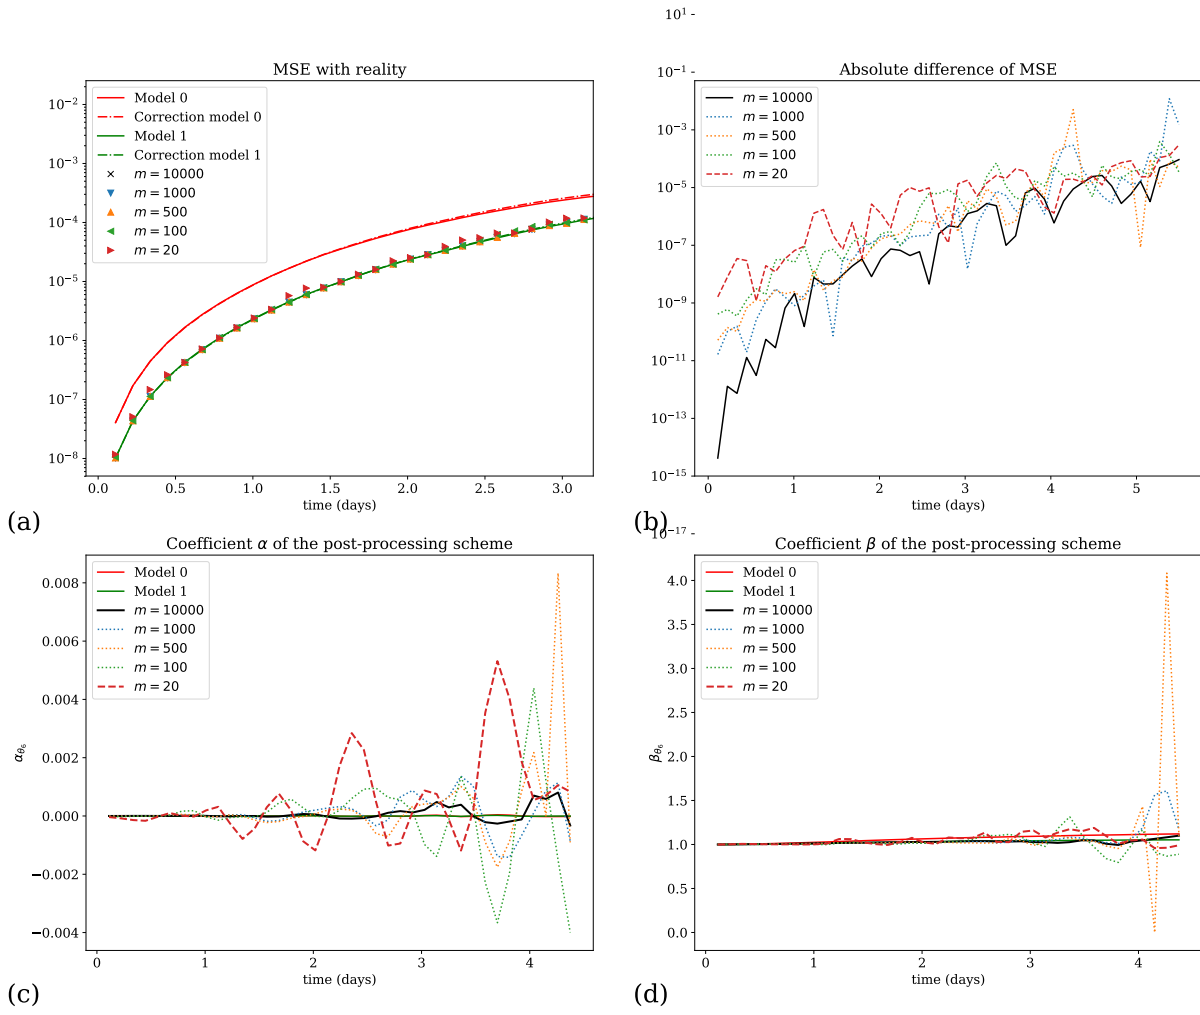

## 1.17 Variable $\theta_7$

### 1.17.1 Corrections of the moments of the variable

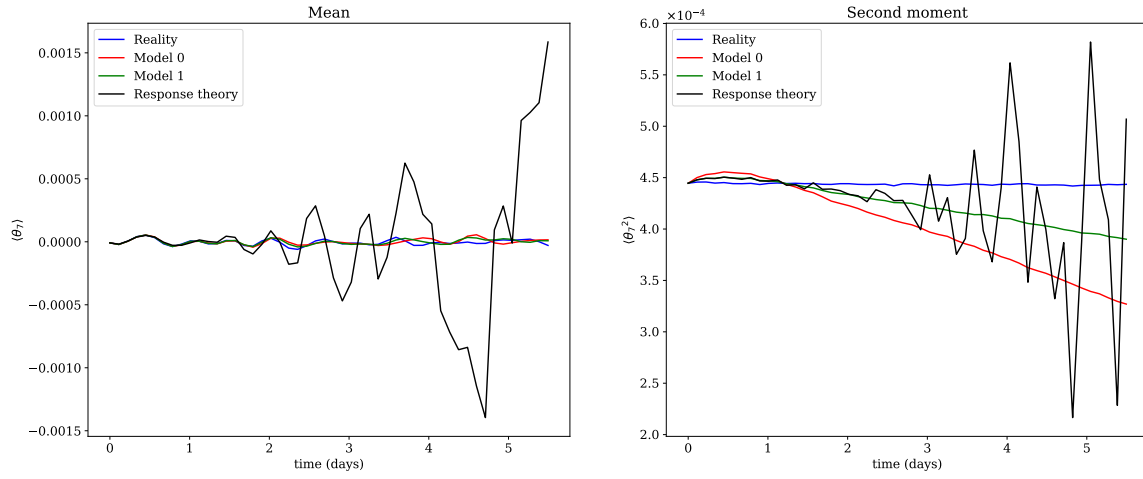

### 1.17.2 Performance of the correction

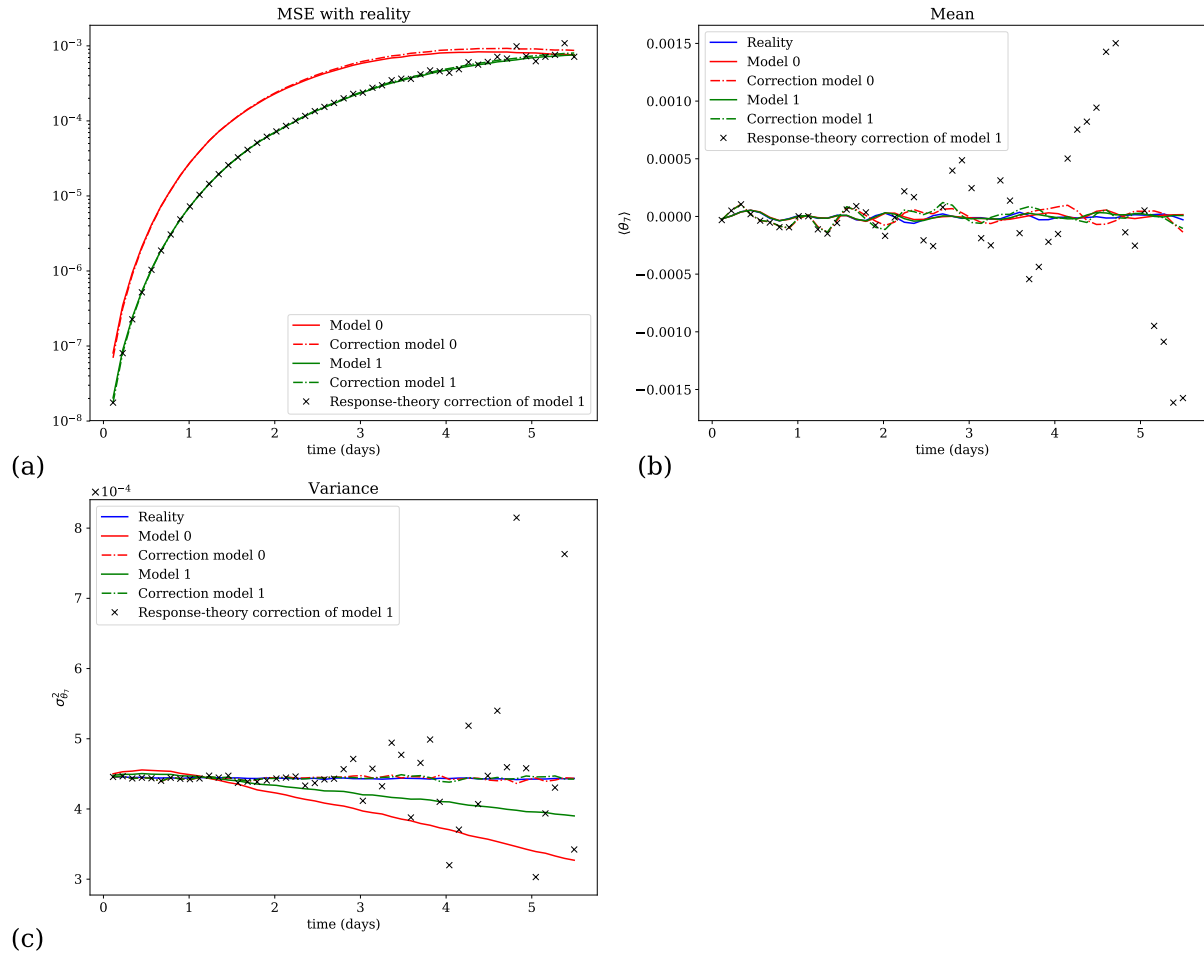

### 1.17.3 Comparison of the efficiency of the response theory correction for different numbers $m$ of trajectories

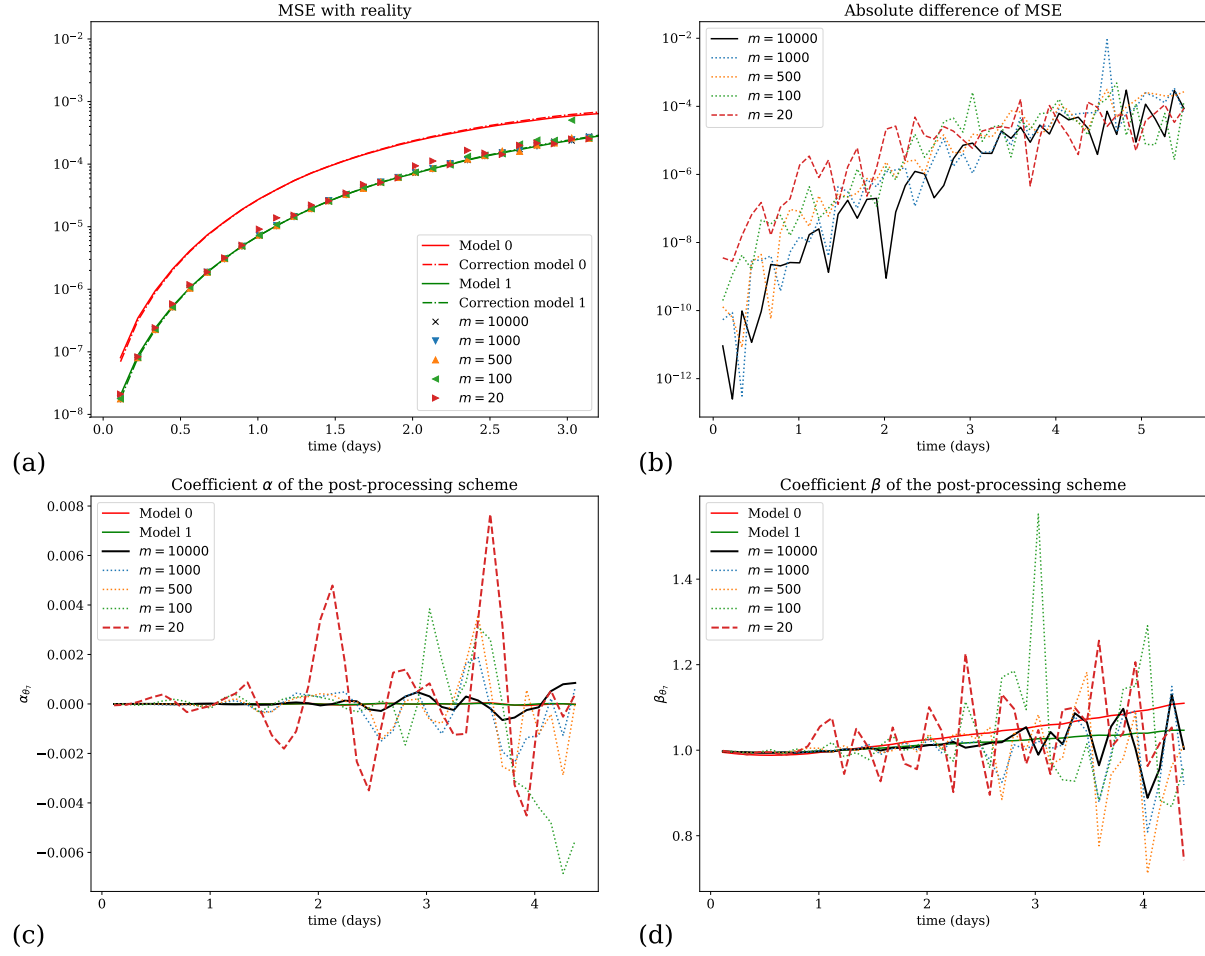

## 1.18 Variable $\theta_8$

### 1.18.1 Corrections of the moments of the variable

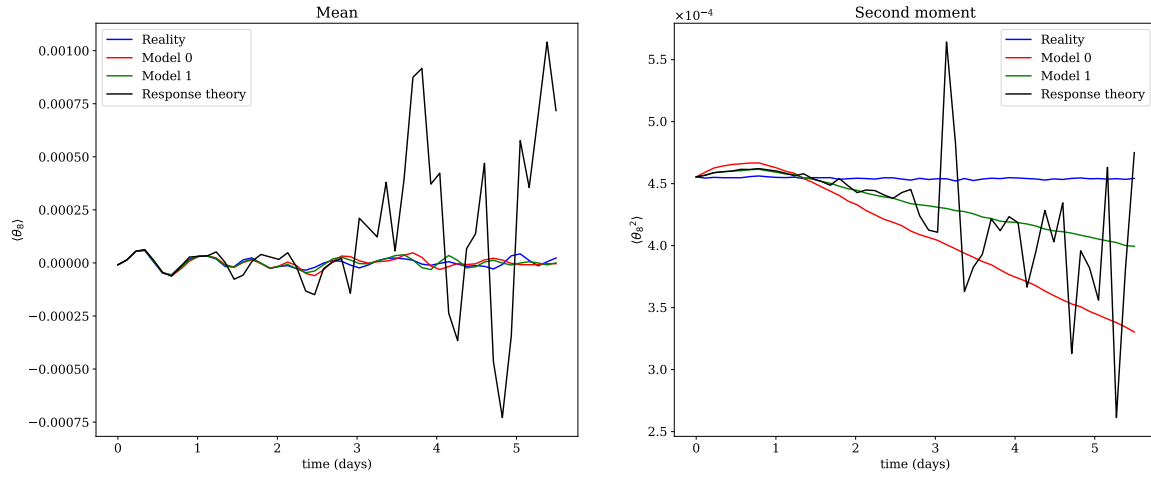

### 1.18.2 Performance of the correction

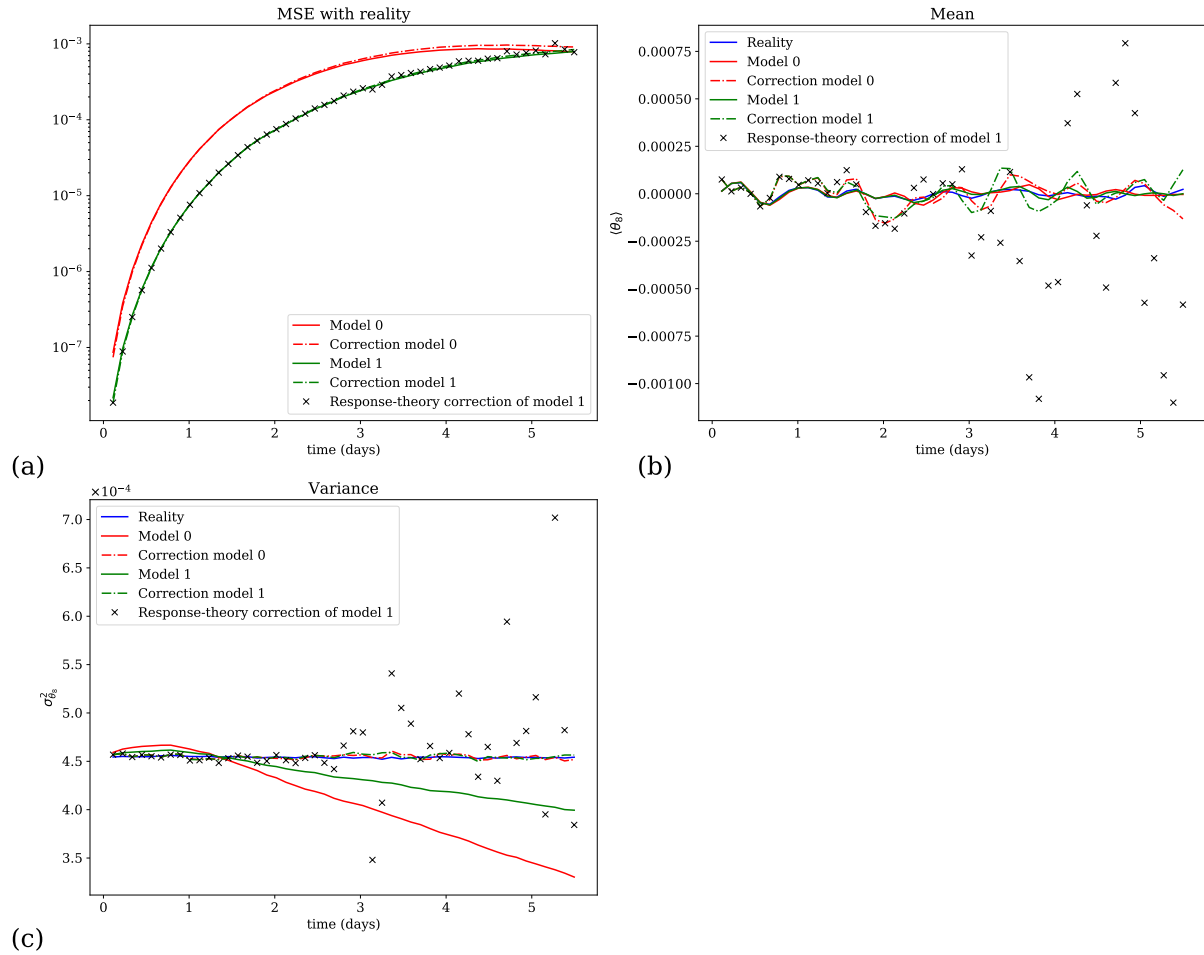

### 1.18.3 Comparison of the efficiency of the response theory correction for different numbers $m$ of trajectories

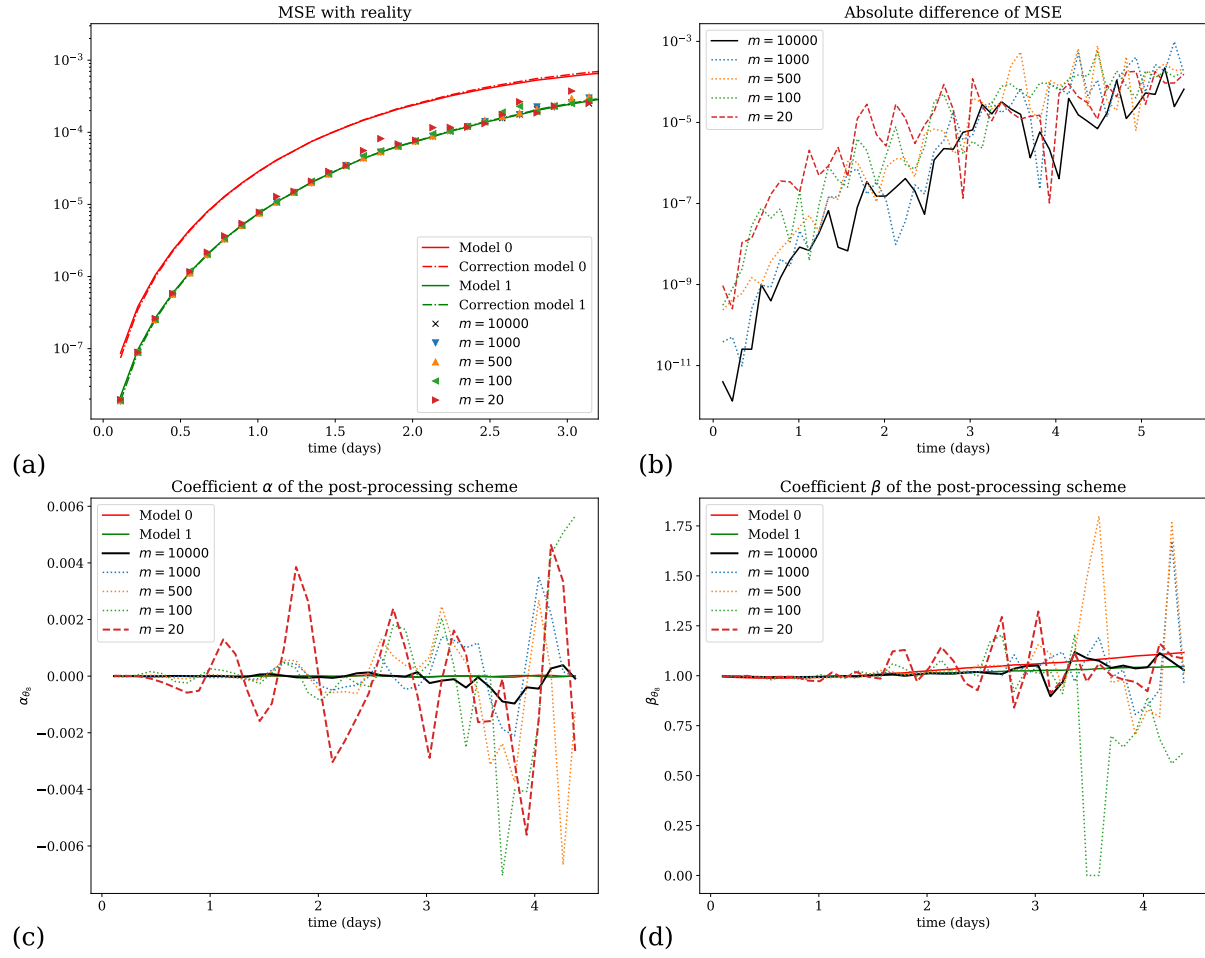

## 1.19 Variable $\theta_9$

### 1.19.1 Corrections of the moments of the variable

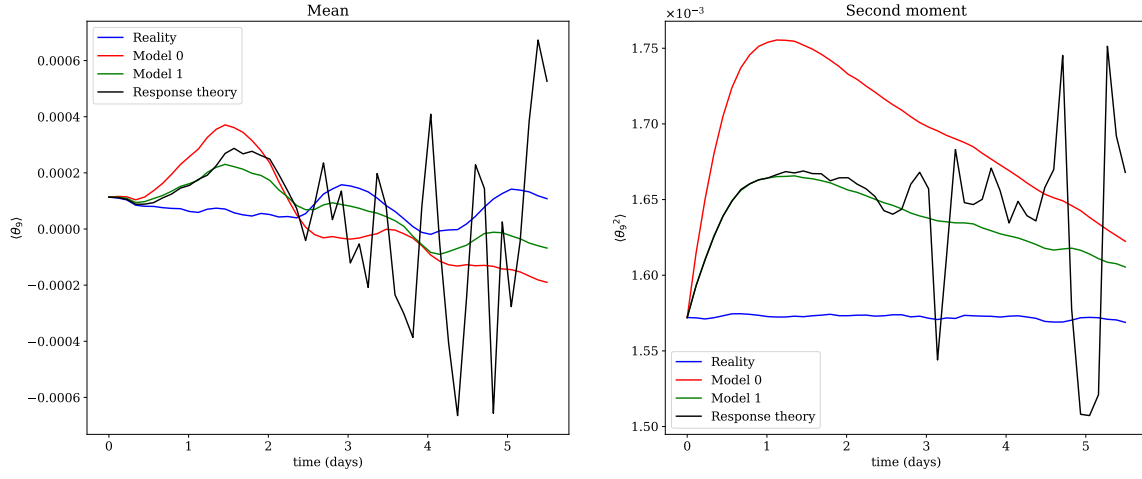

### 1.19.2 Performance of the correction

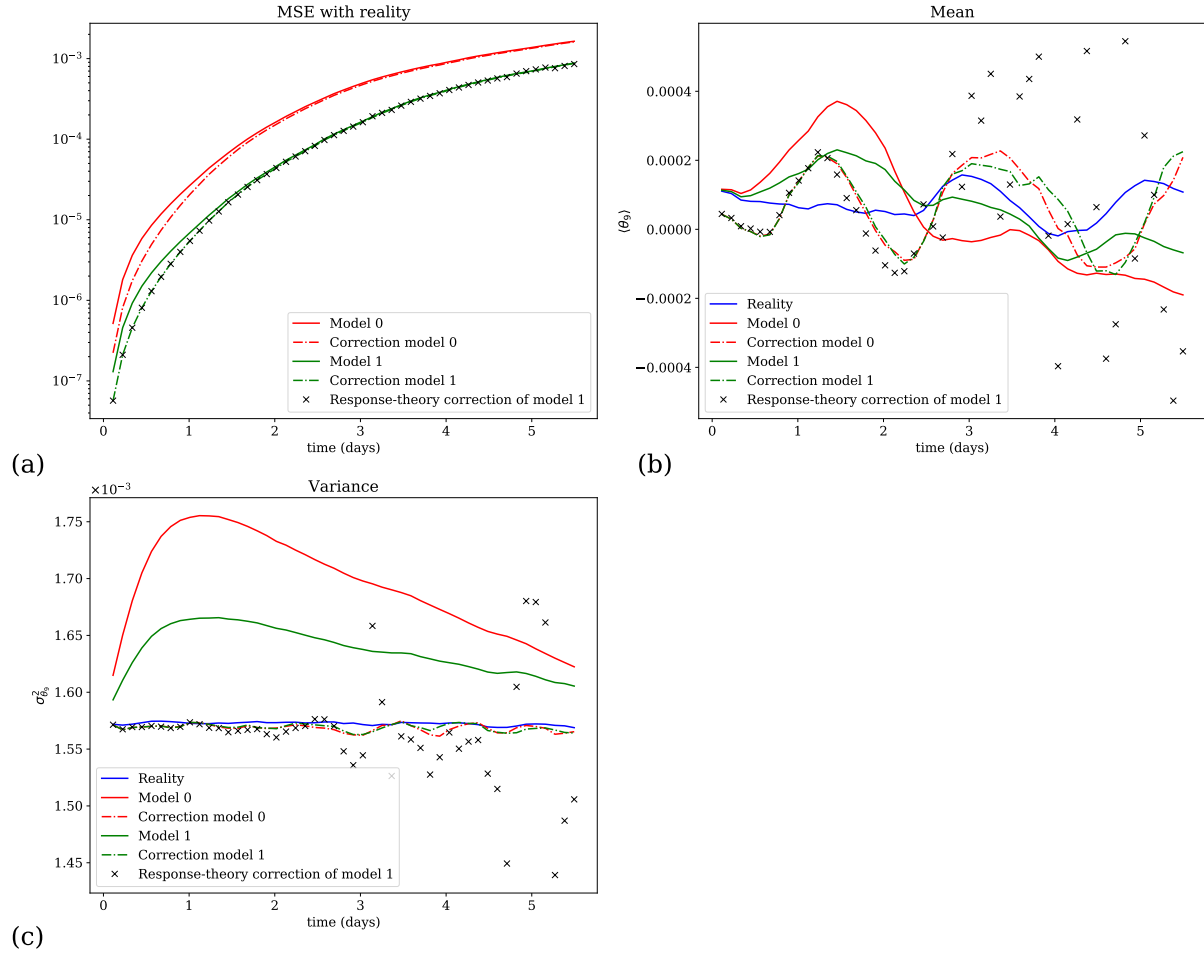

### 1.19.3 Comparison of the efficiency of the response theory correction for different numbers $m$ of trajectories

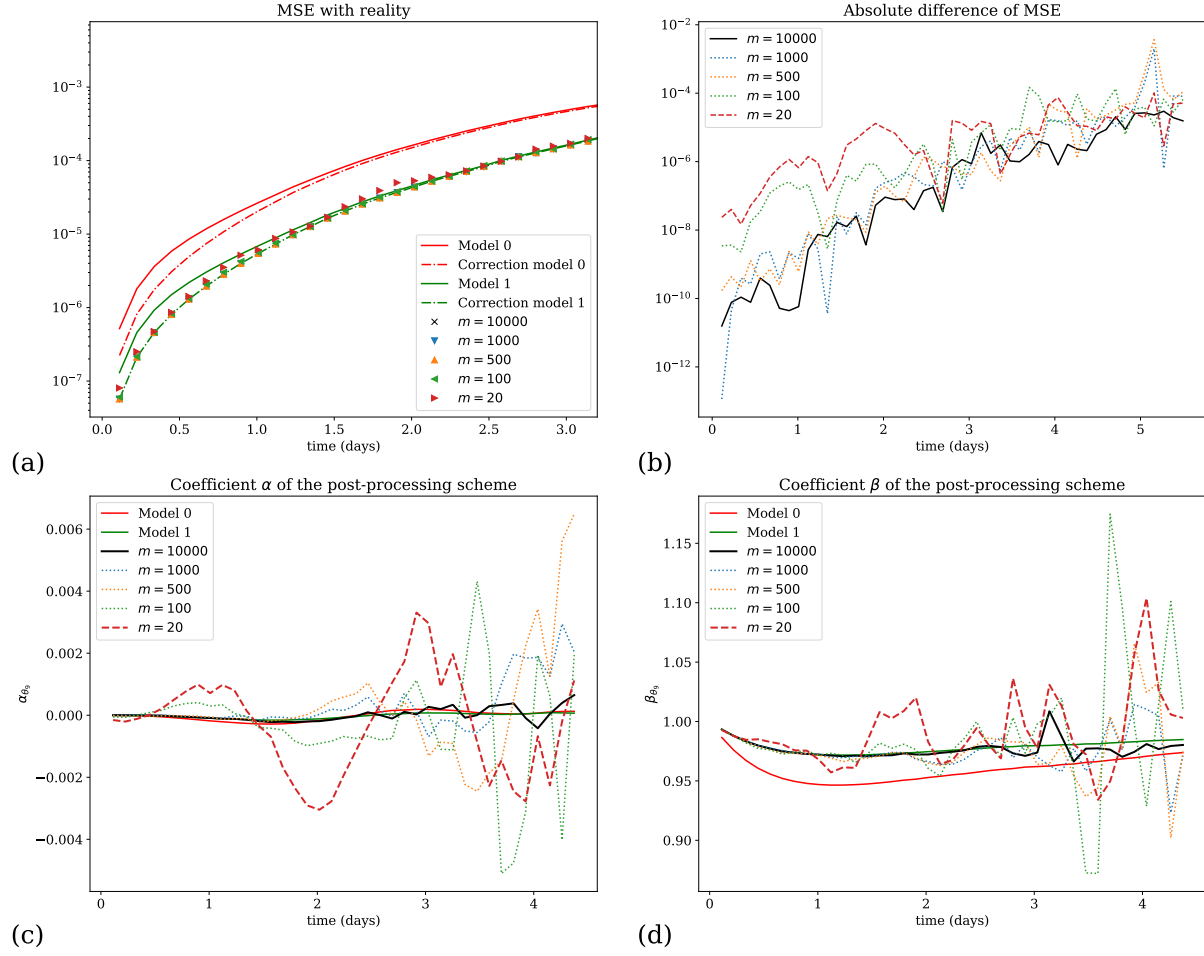



## 1.20 Variable $\theta_{10}$

### 1.20.1 Corrections of the moments of the variable

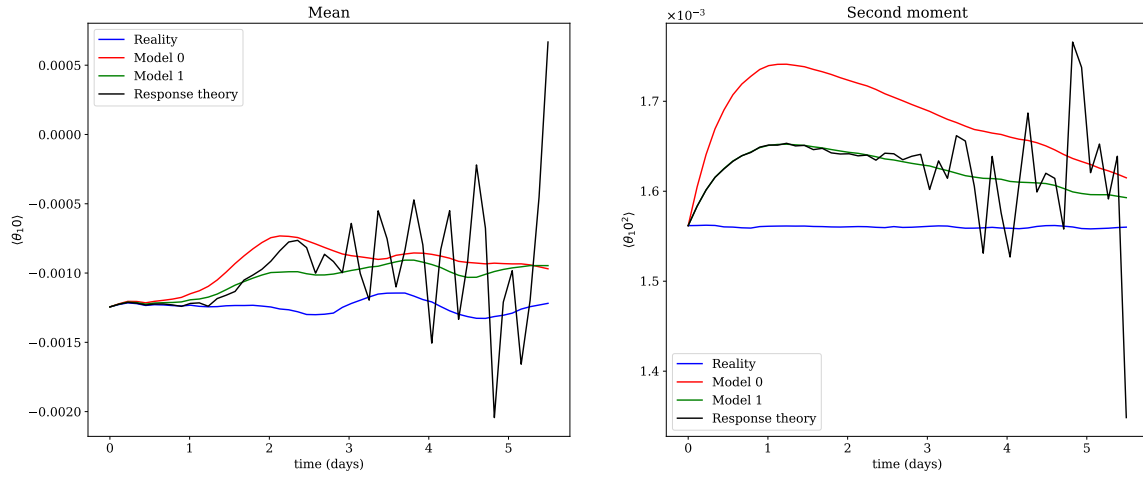

### 1.20.2 Performance of the correction

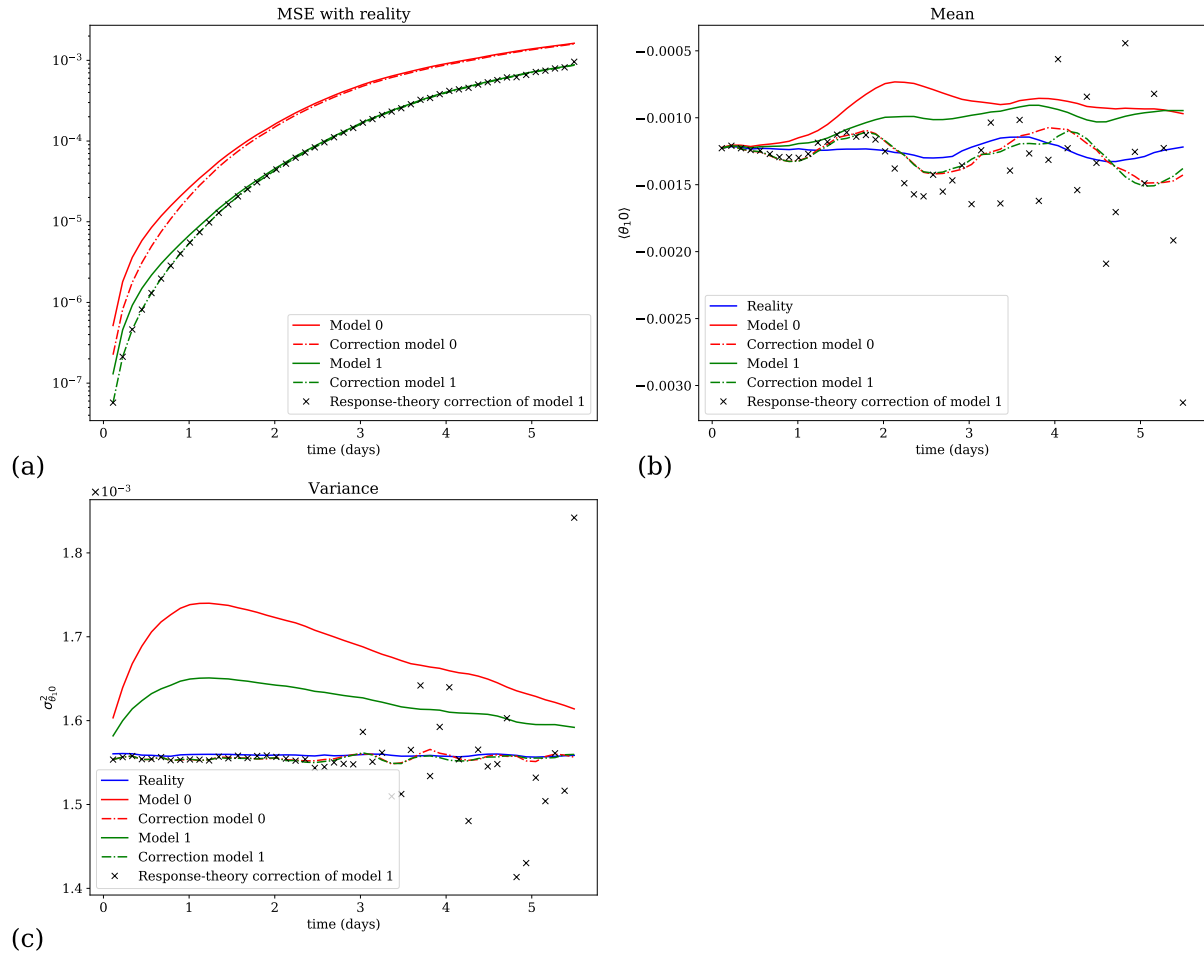

### 1.20.3 Comparison of the efficiency of the response theory correction for different numbers $m$ of trajectories

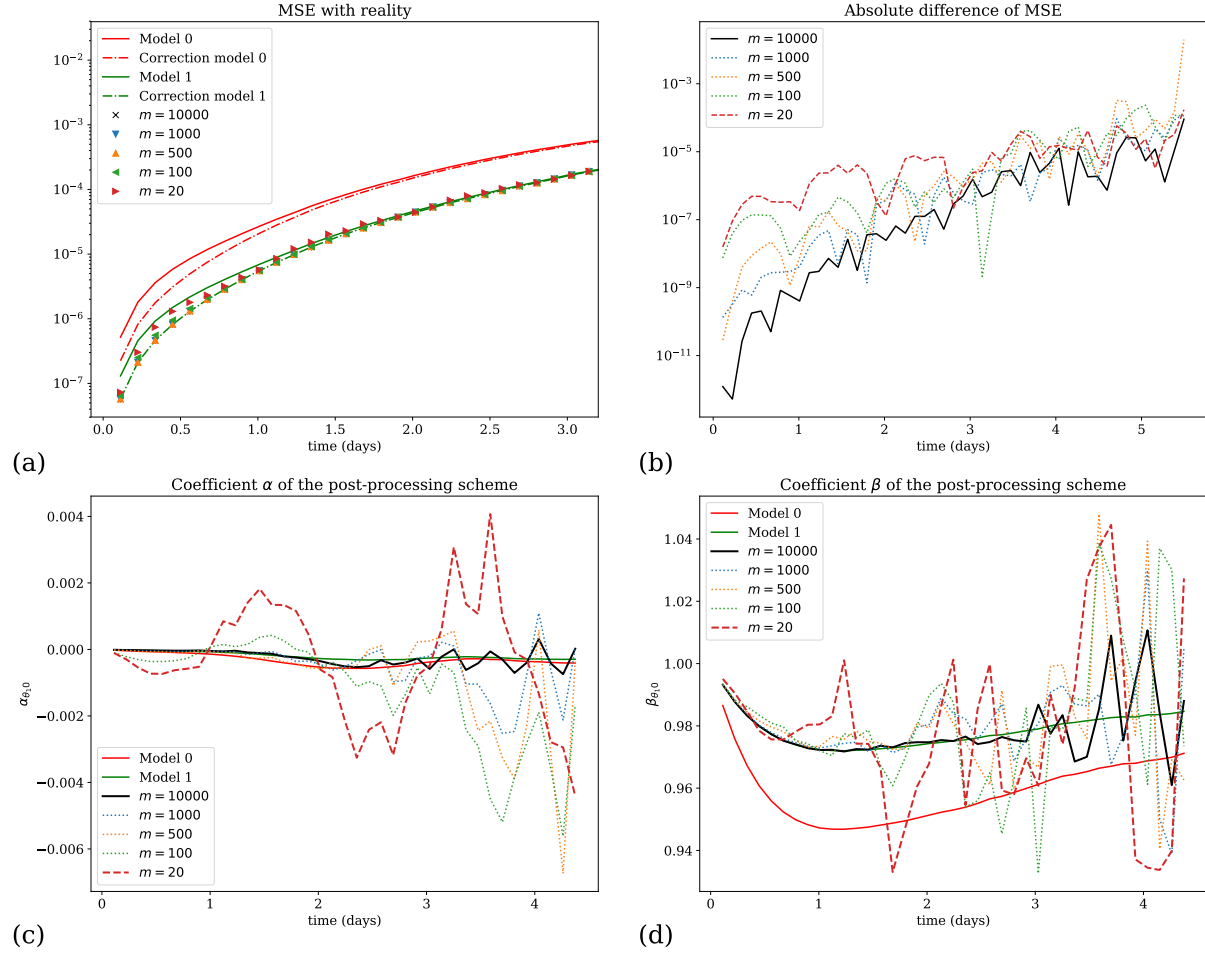

## 2 Experiment varying the Newtonian cooling coefficient

### 2.1 Variable $\psi_1$

#### 2.1.1 Corrections of the moments of the variable

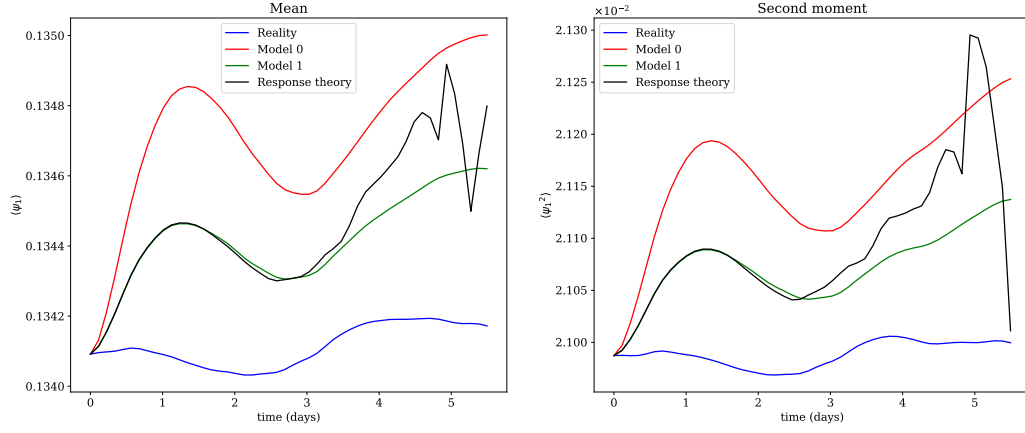

#### 2.1.2 Performance of the correction

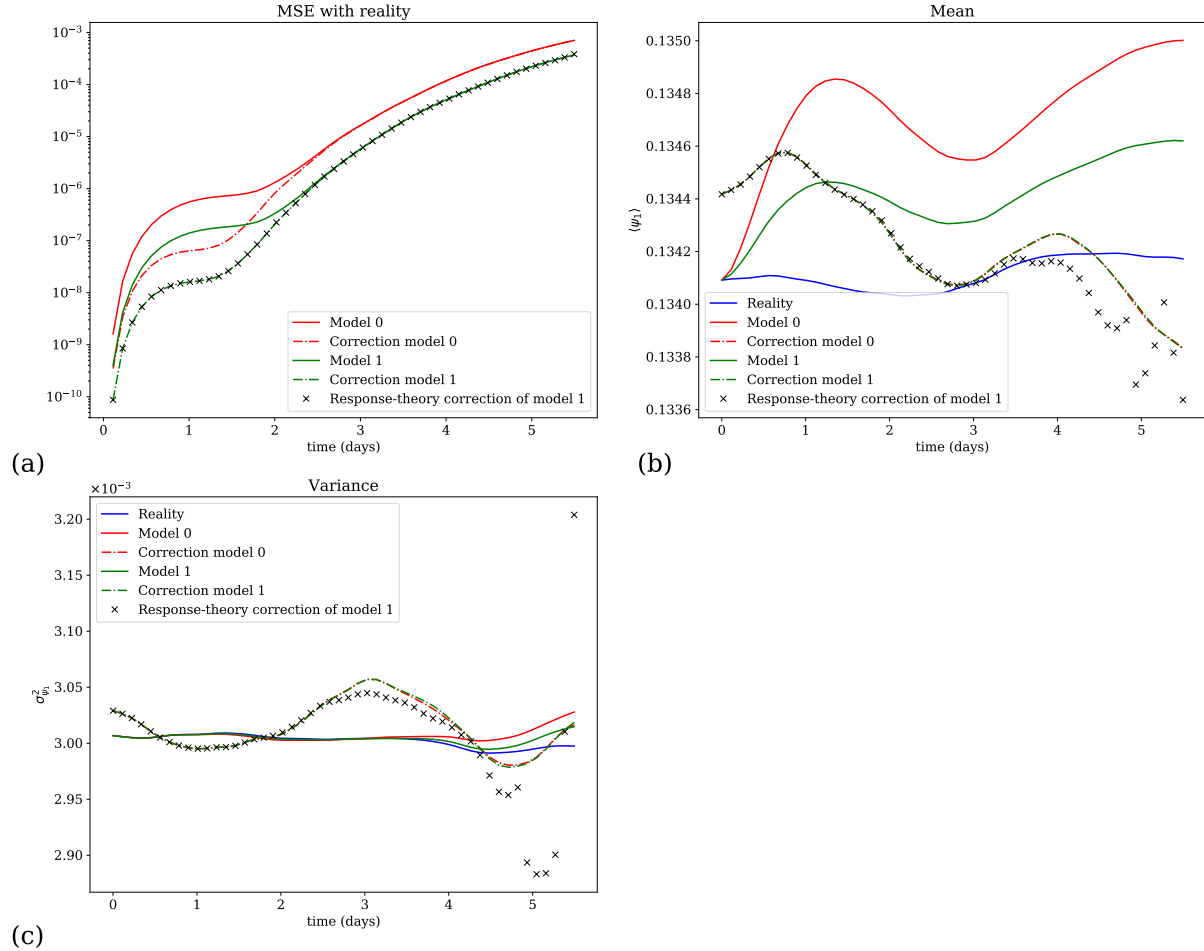

### 2.1.3 Comparison of the efficiency of the response theory correction for different numbers $m$ of trajectories

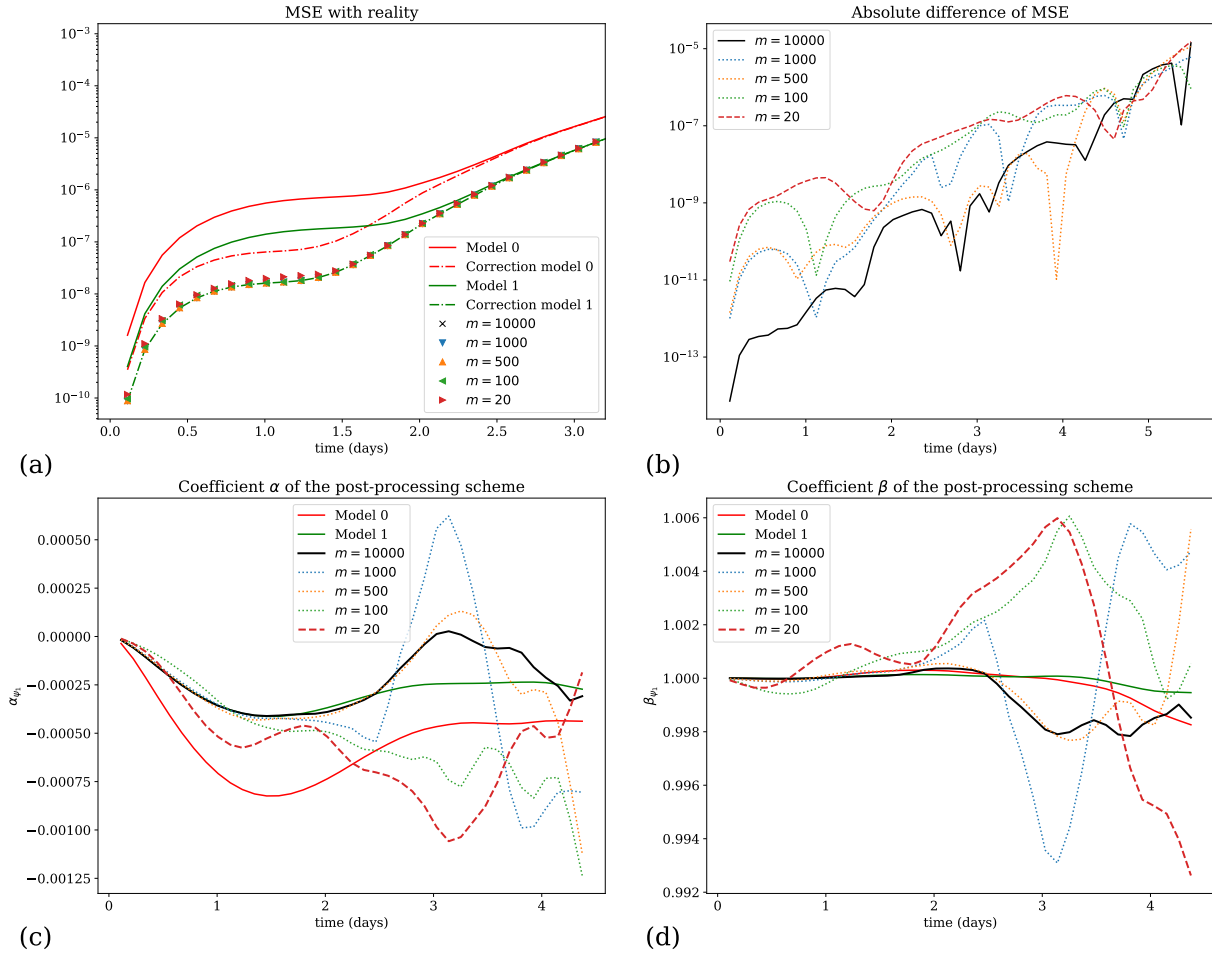

## 2.2 Variable $\psi_2$

### 2.2.1 Corrections of the moments of the variable

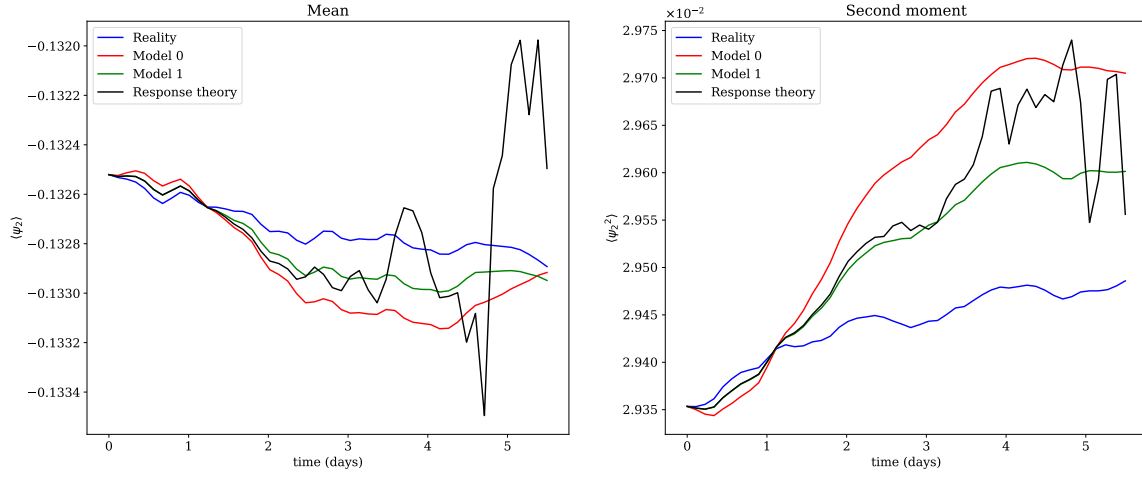

### 2.2.2 Performance of the correction

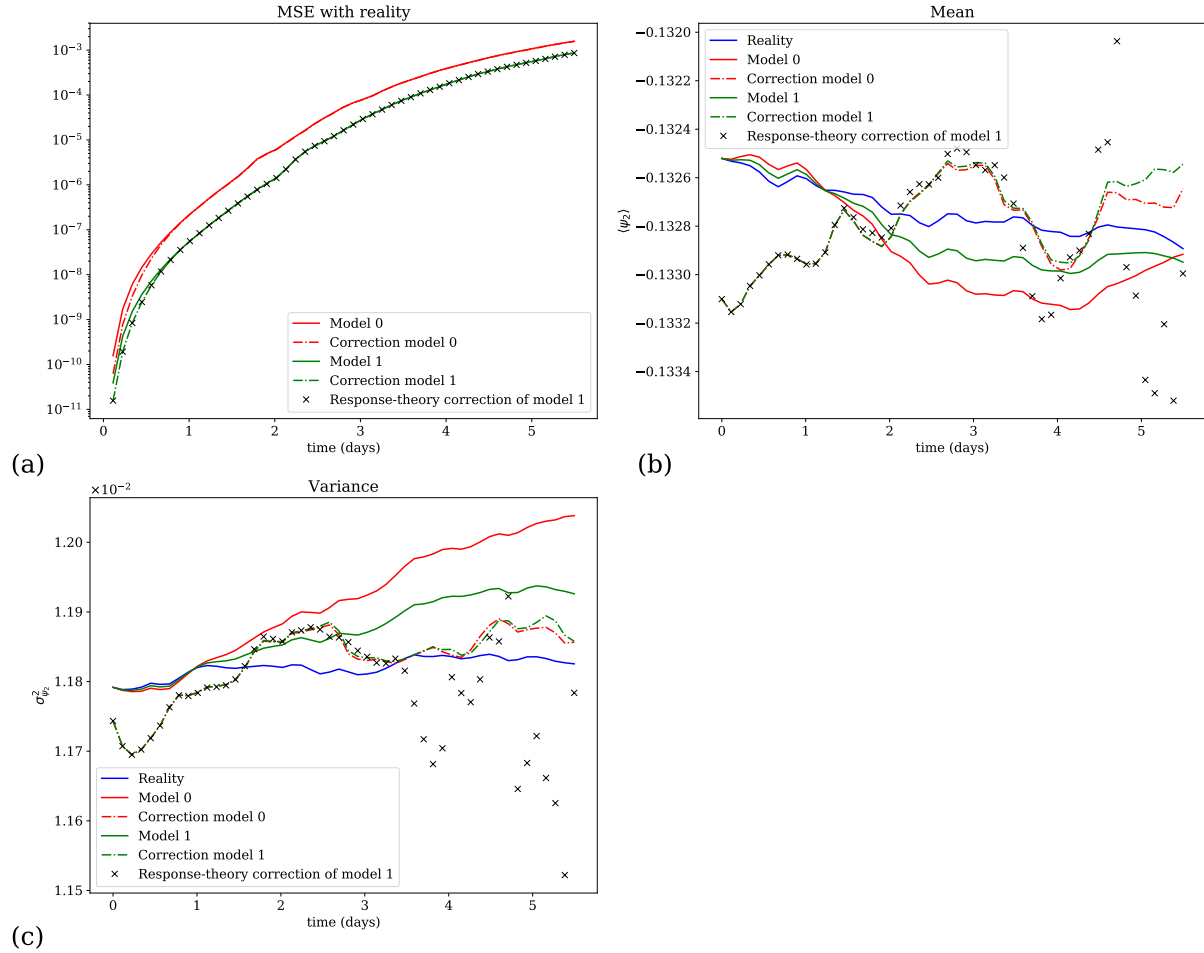

### 2.2.3 Comparison of the efficiency of the response theory correction for different numbers $m$ of trajectories

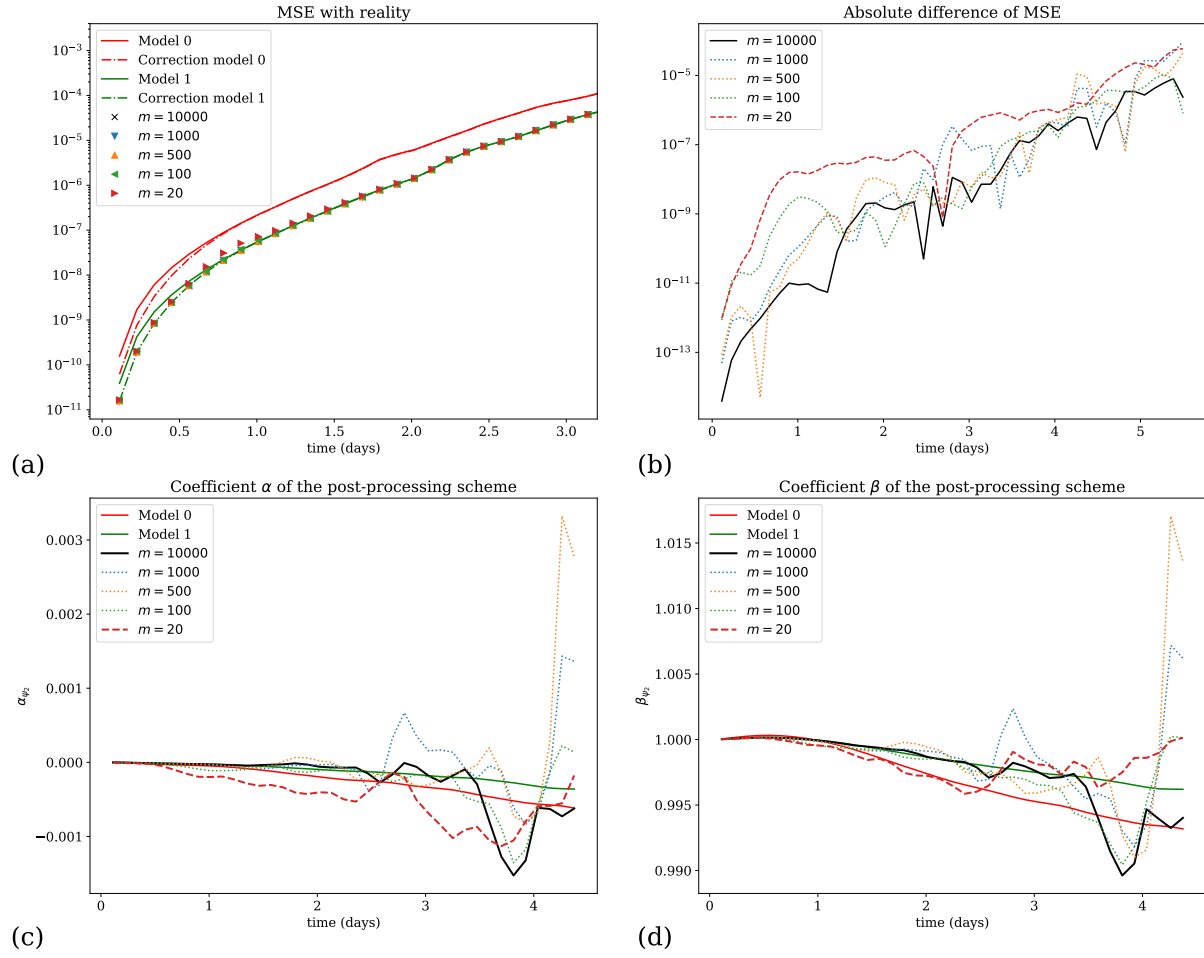

## 2.3 Variable $\psi_3$

### 2.3.1 Corrections of the moments of the variable

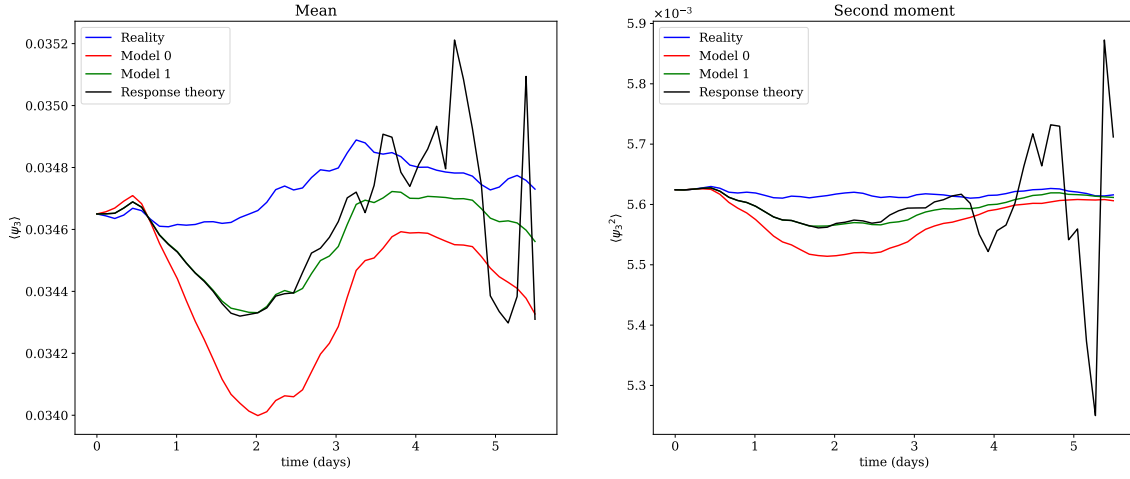

### 2.3.2 Performance of the correction

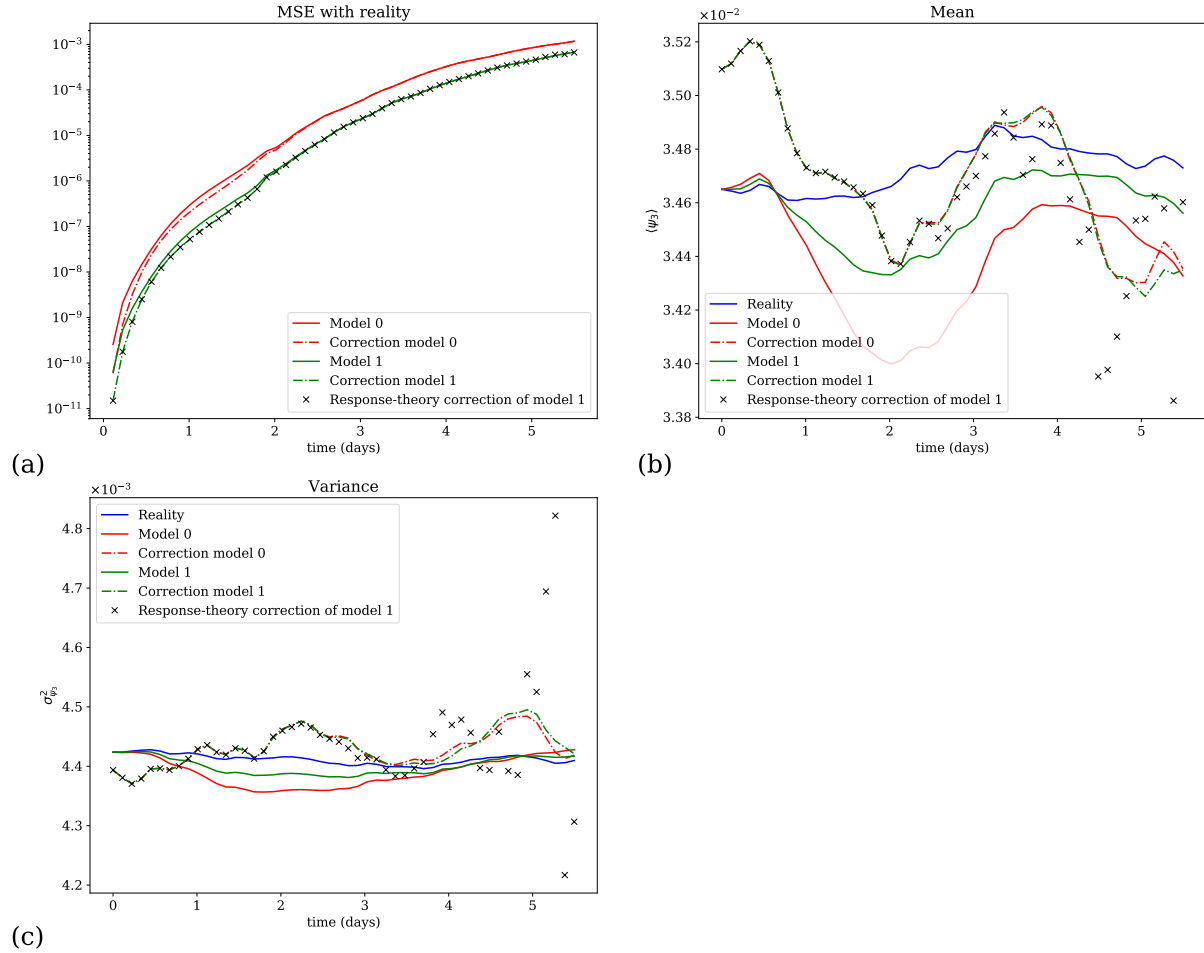

### 2.3.3 Comparison of the efficiency of the response theory correction for different numbers $m$ of trajectories

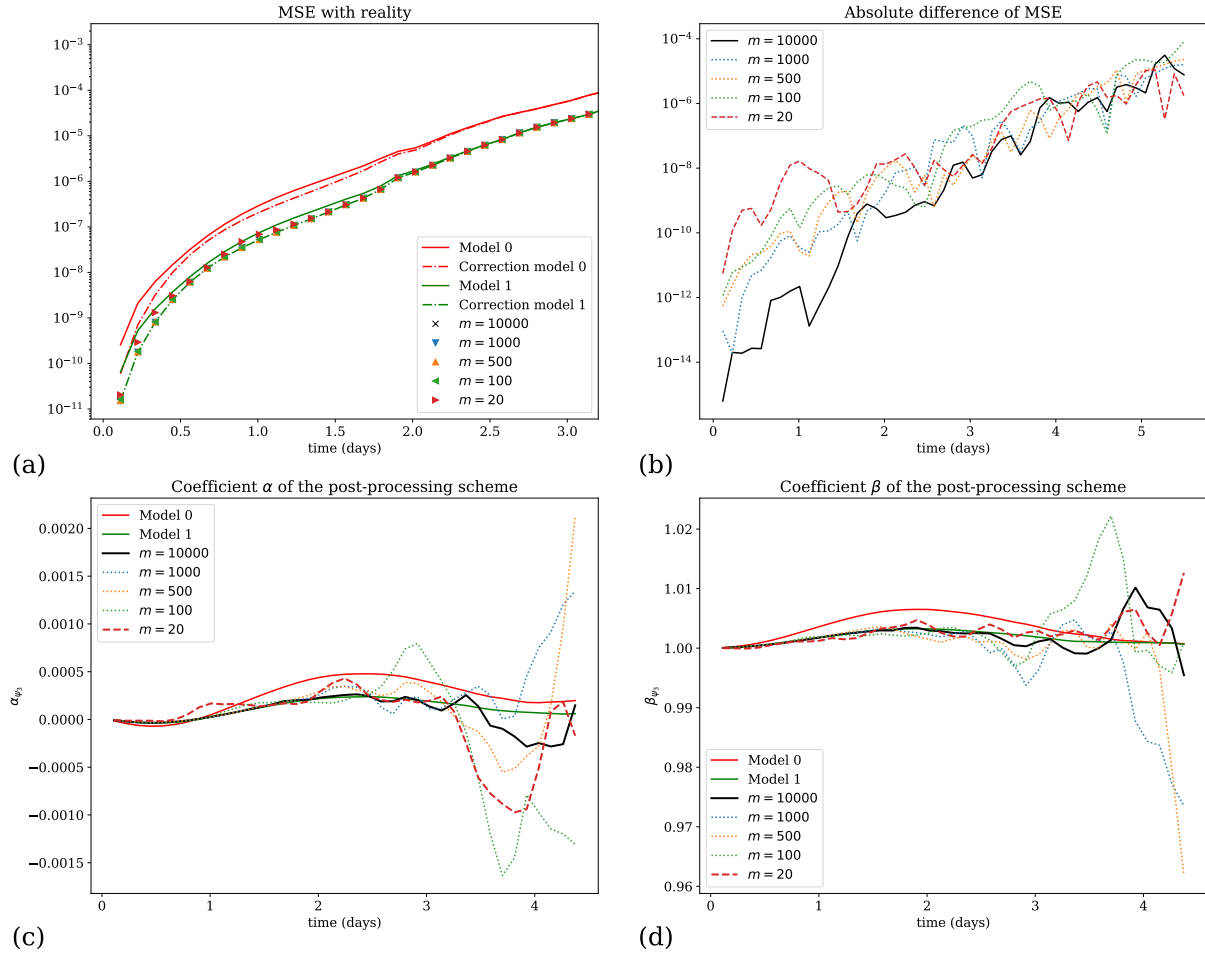



## 2.4 Variable $\psi_4$

### 2.4.1 Corrections of the moments of the variable

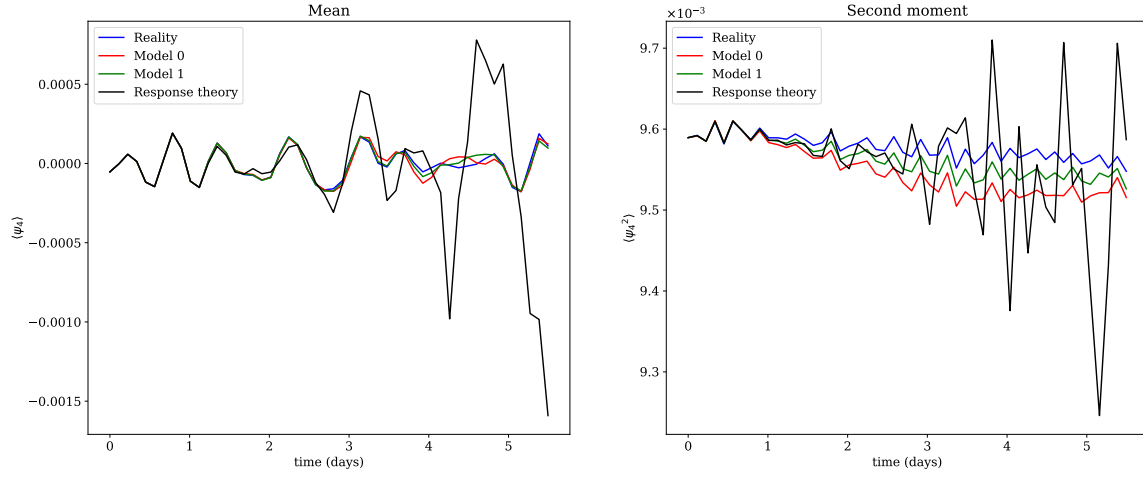

### 2.4.2 Performance of the correction

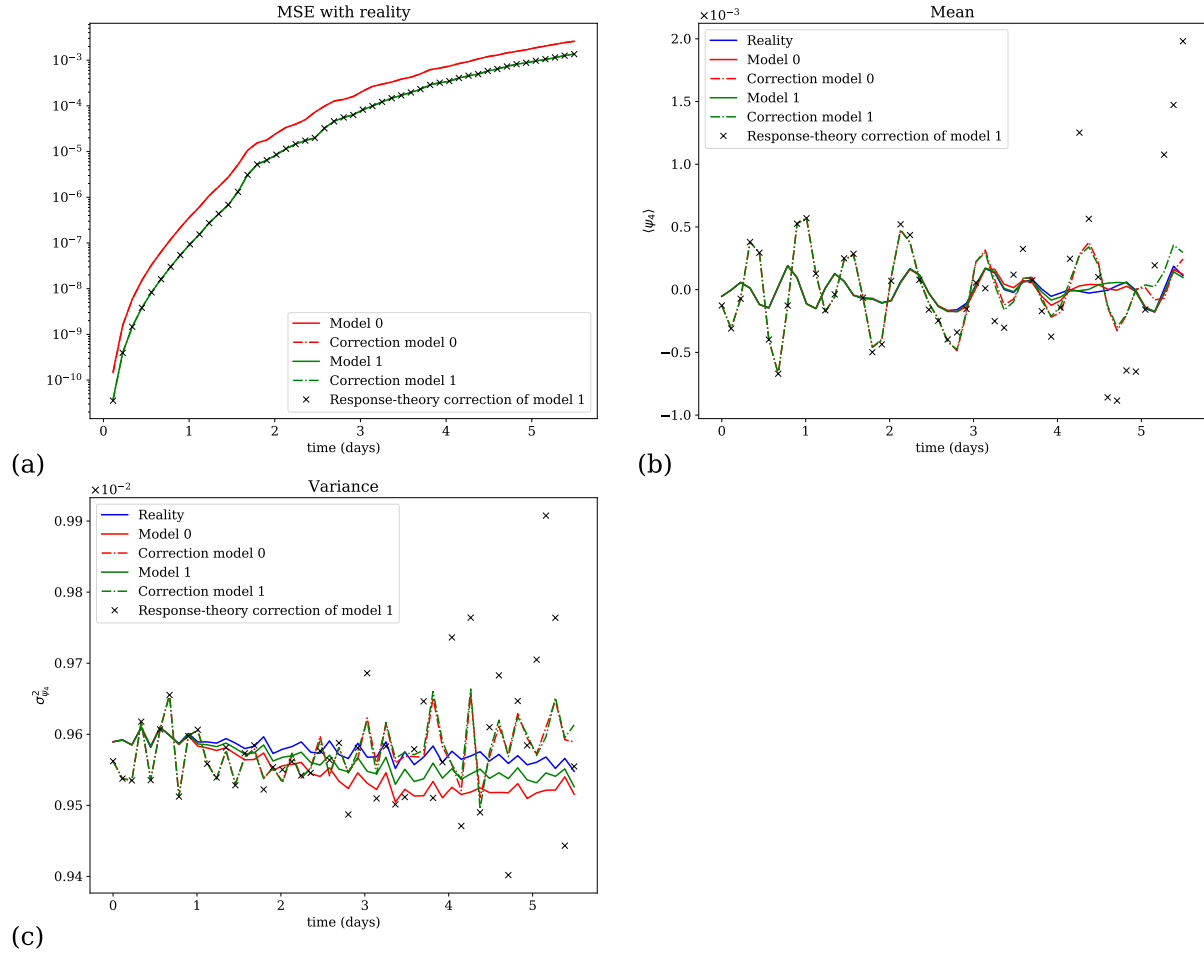

### 2.4.3 Comparison of the efficiency of the response theory correction for different numbers $m$ of trajectories

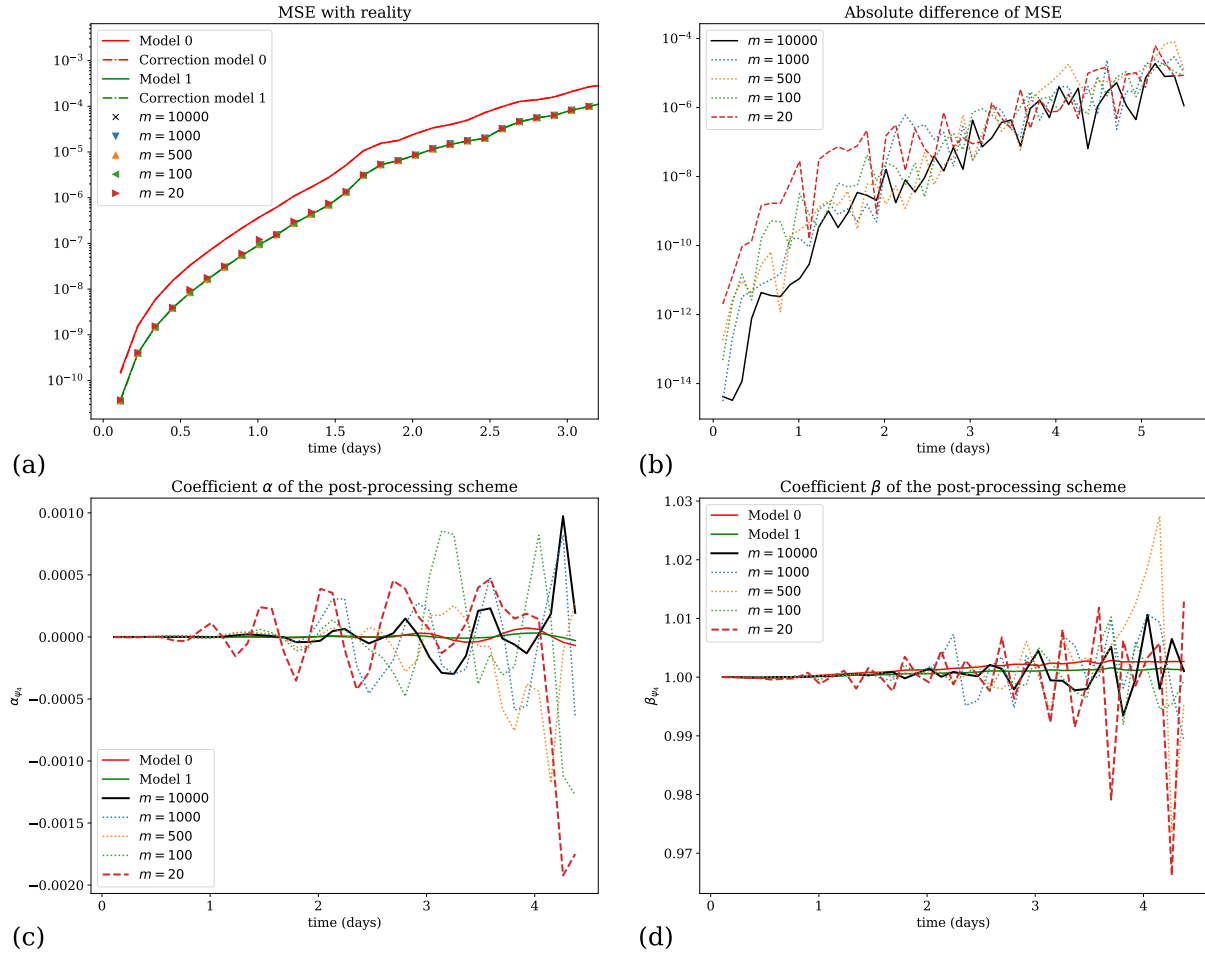

## 2.5 Variable $\psi_5$

### 2.5.1 Corrections of the moments of the variable

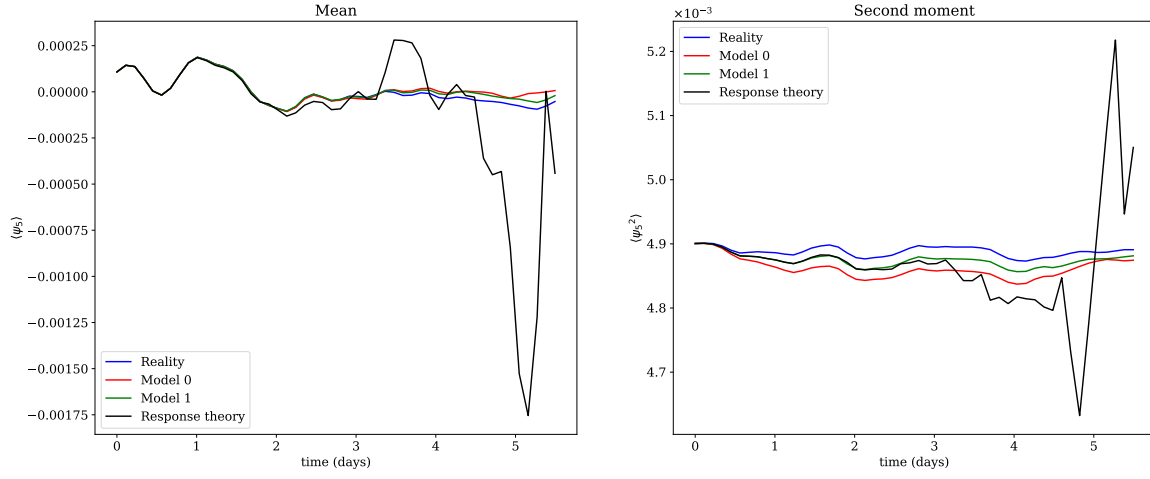

### 2.5.2 Performance of the correction

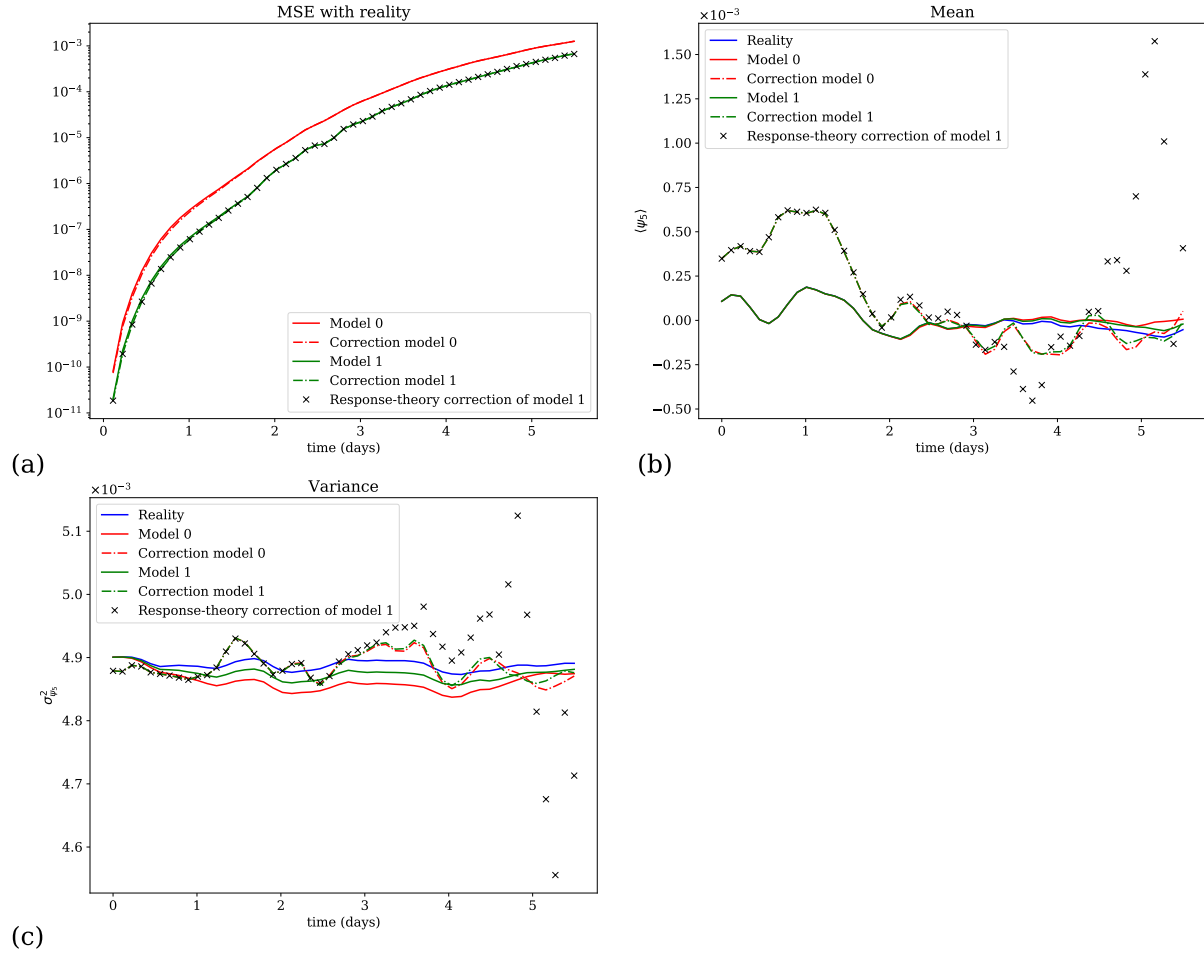

### 2.5.3 Comparison of the efficiency of the response theory correction for different numbers $m$ of trajectories

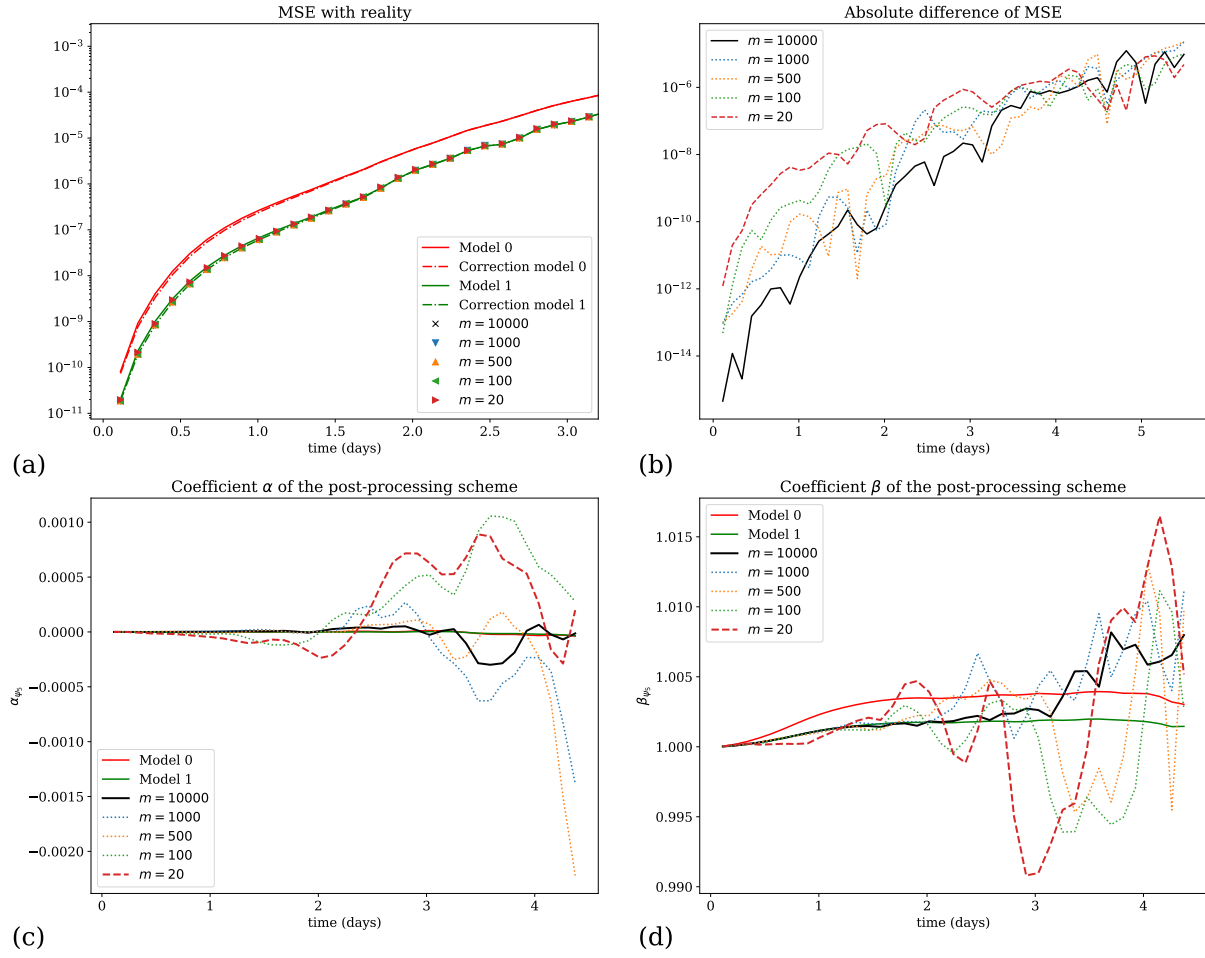

## 2.6 Variable $\psi_6$

### 2.6.1 Corrections of the moments of the variable

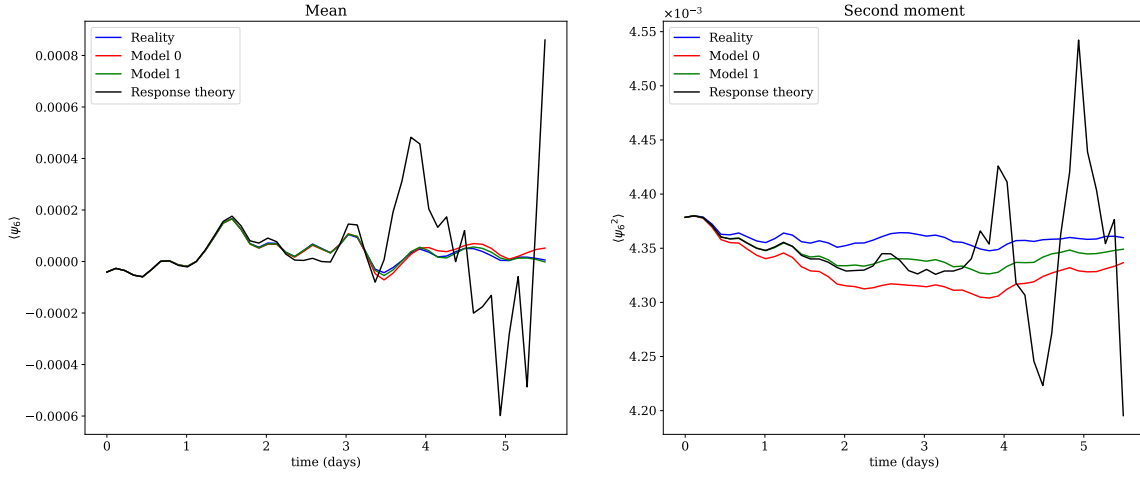

### 2.6.2 Performance of the correction

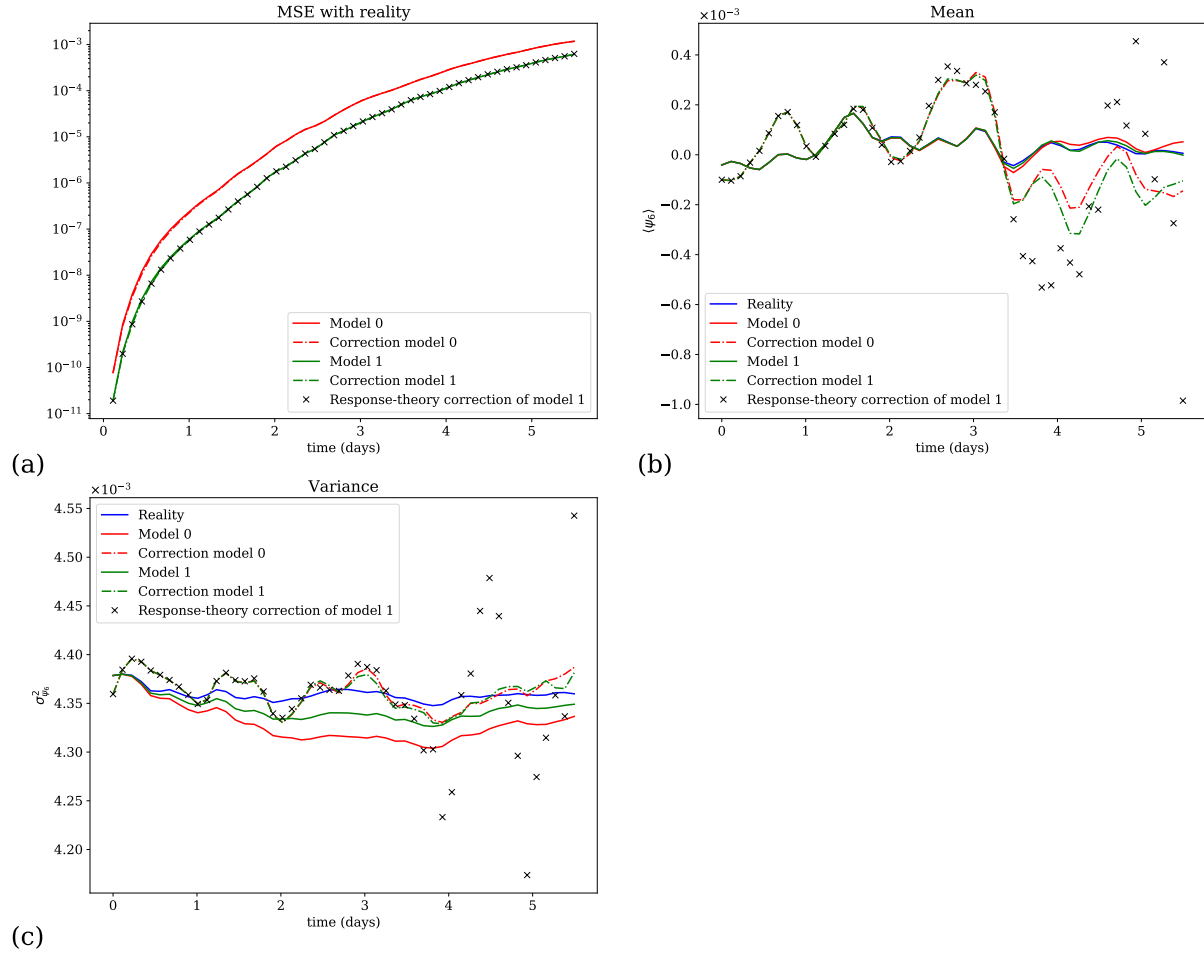

### 2.6.3 Comparison of the efficiency of the response theory correction for different numbers $m$ of trajectories

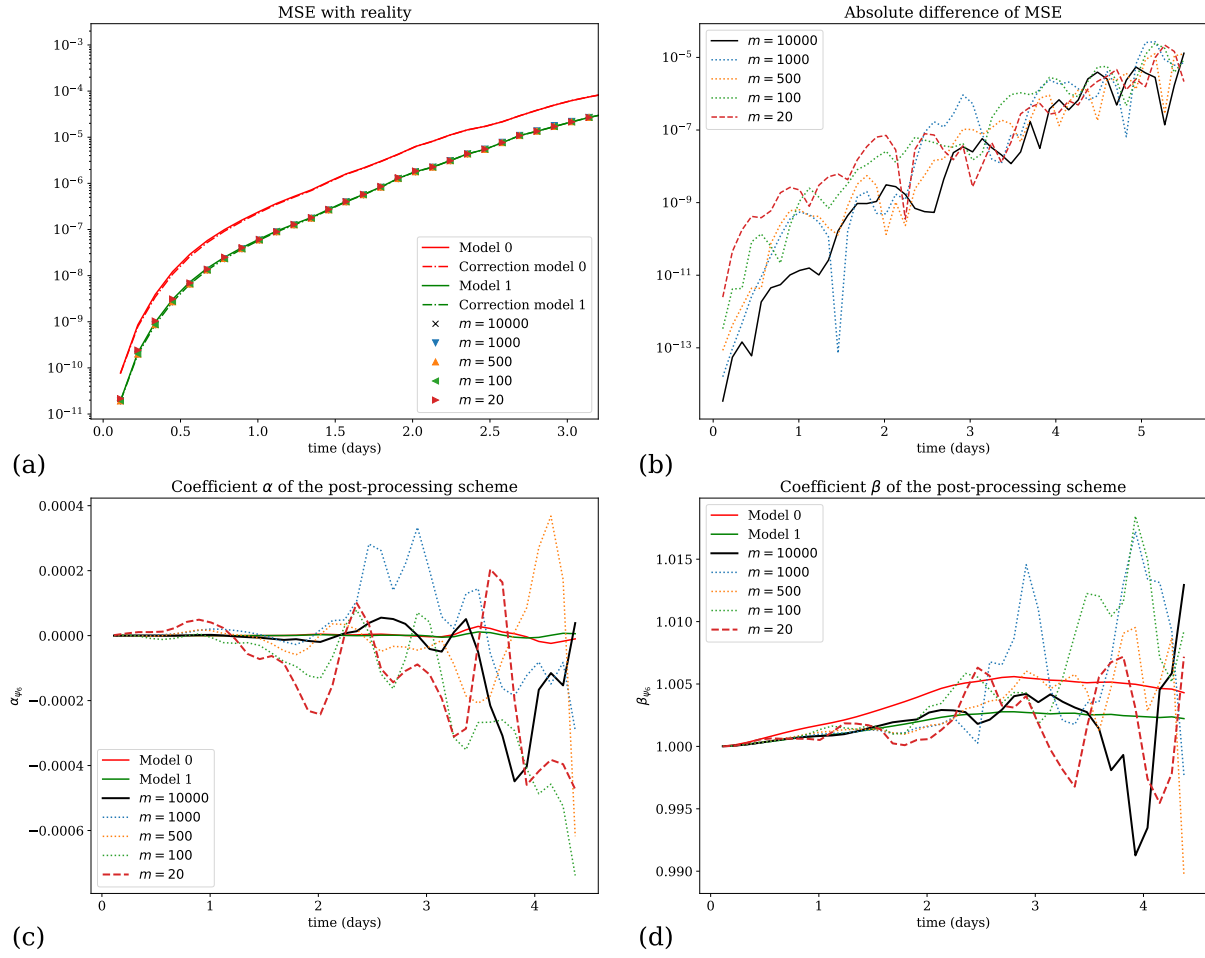

## 2.7 Variable $\psi_7$

### 2.7.1 Corrections of the moments of the variable

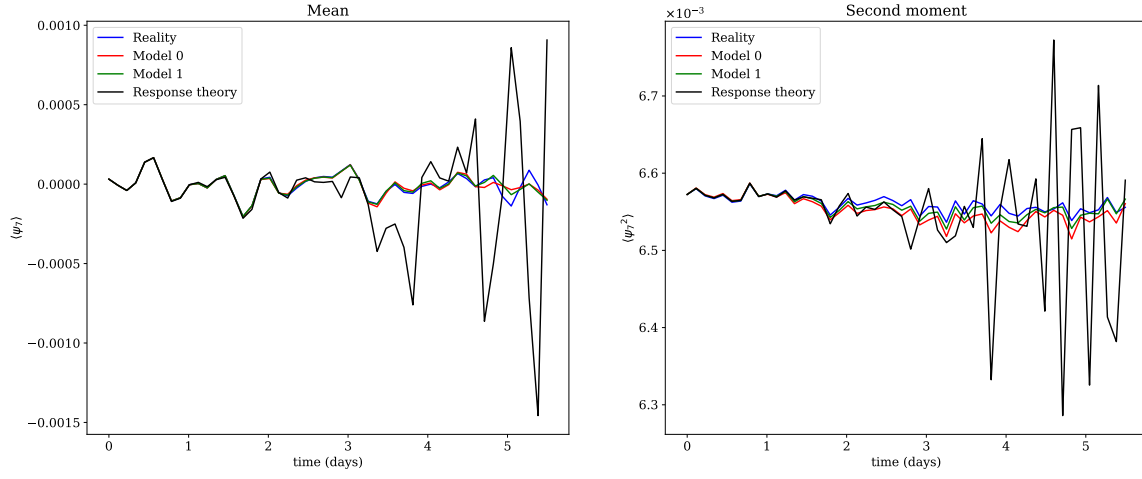

### 2.7.2 Performance of the correction

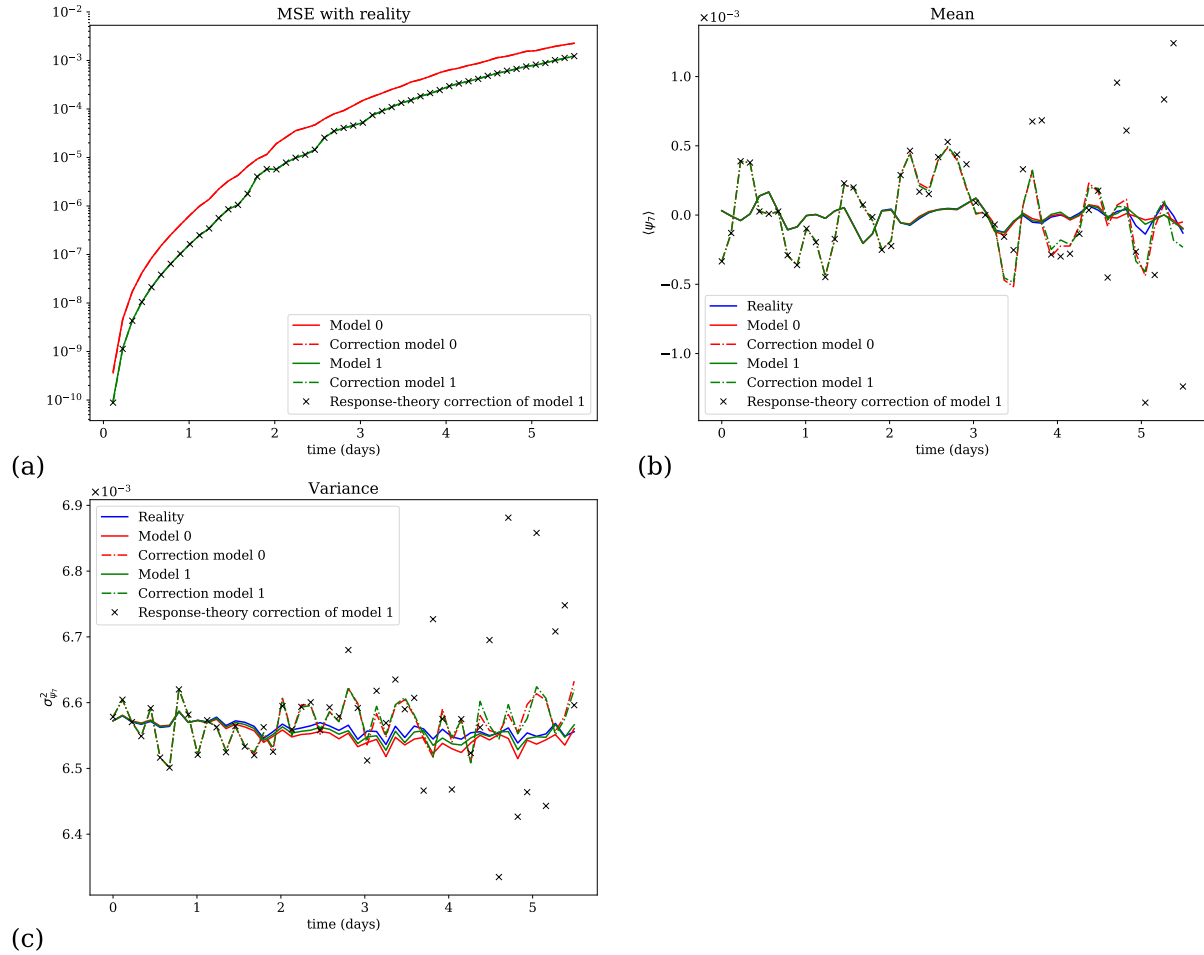

### 2.7.3 Comparison of the efficiency of the response theory correction for different numbers $m$ of trajectories

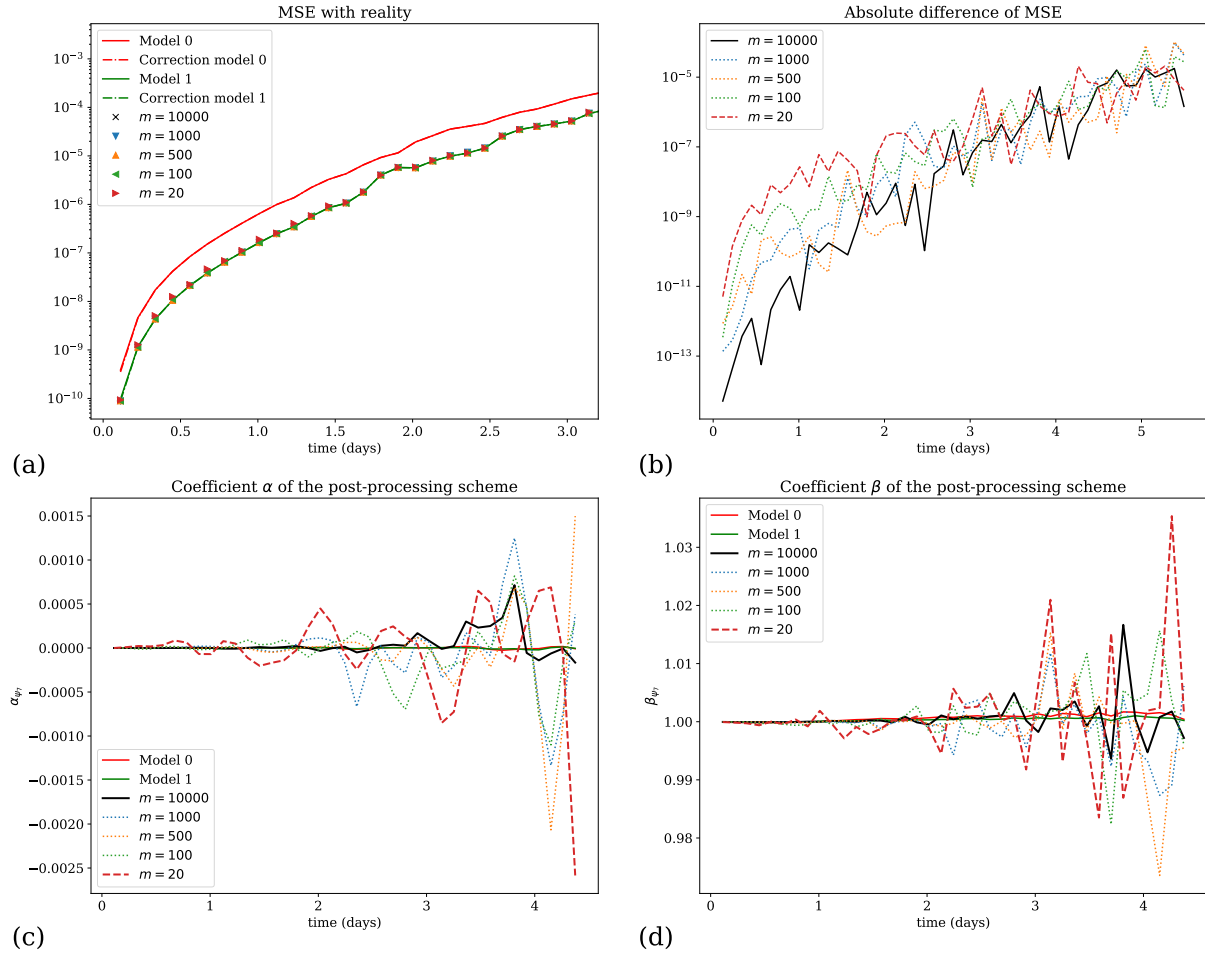



## 2.8 Variable $\psi_8$

### 2.8.1 Corrections of the moments of the variable

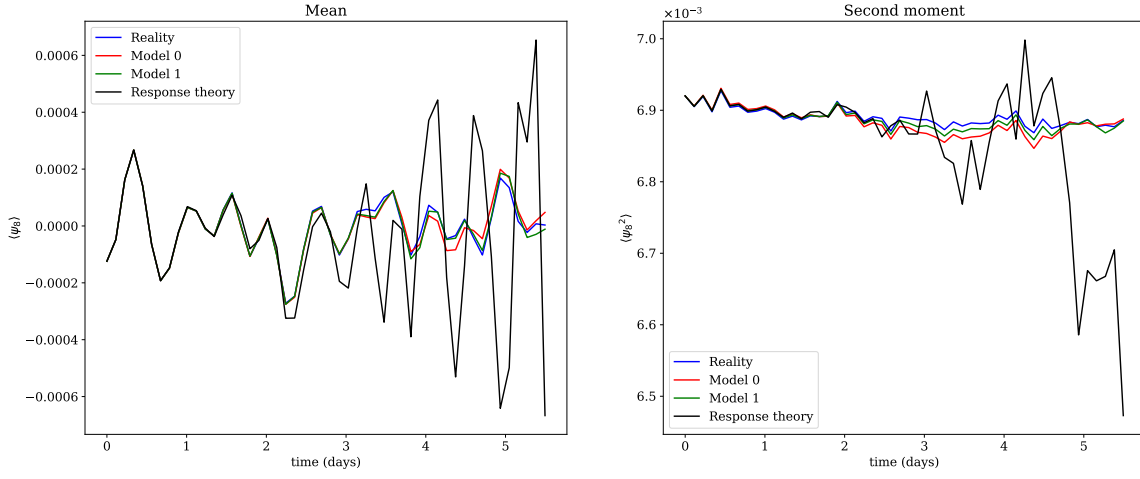

### 2.8.2 Performance of the correction

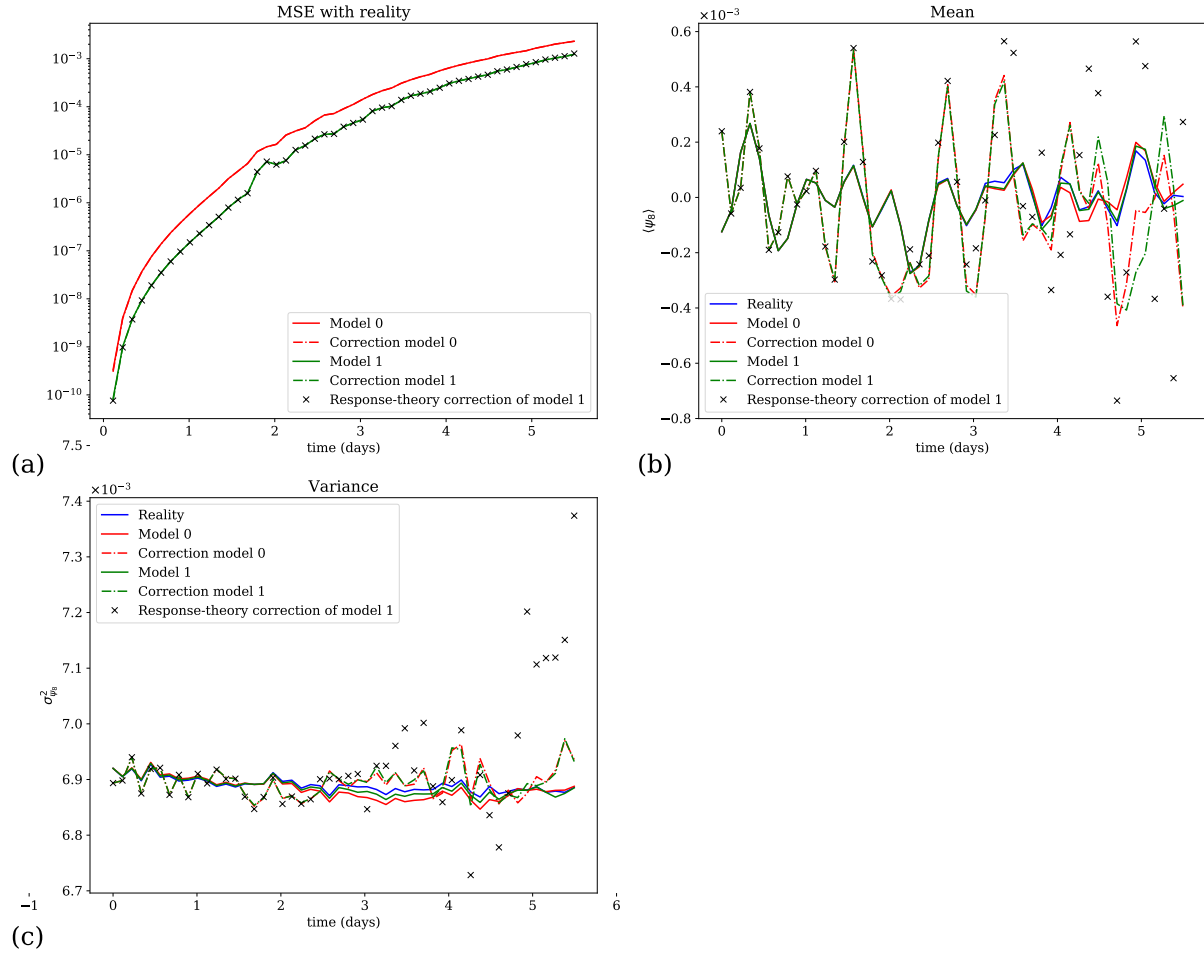

### 2.8.3 Comparison of the efficiency of the response theory correction for different numbers $m$ of trajectories

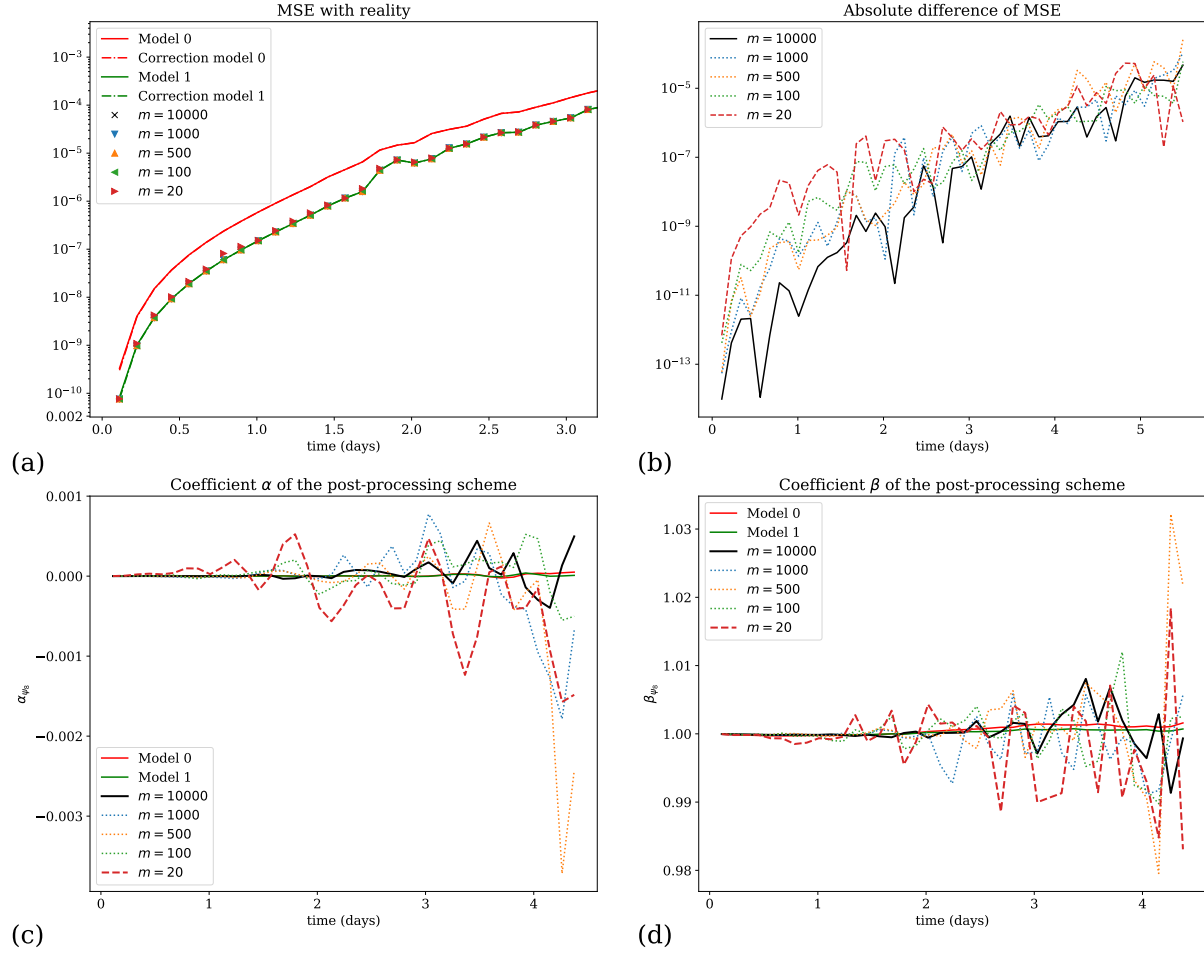

## 2.9 Variable $\psi_9$

### 2.9.1 Corrections of the moments of the variable

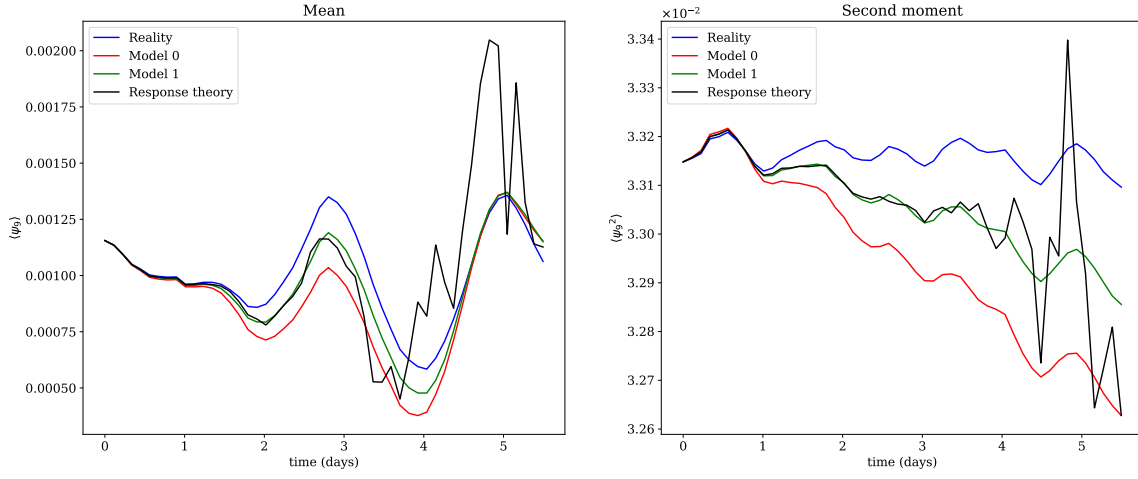

### 2.9.2 Performance of the correction

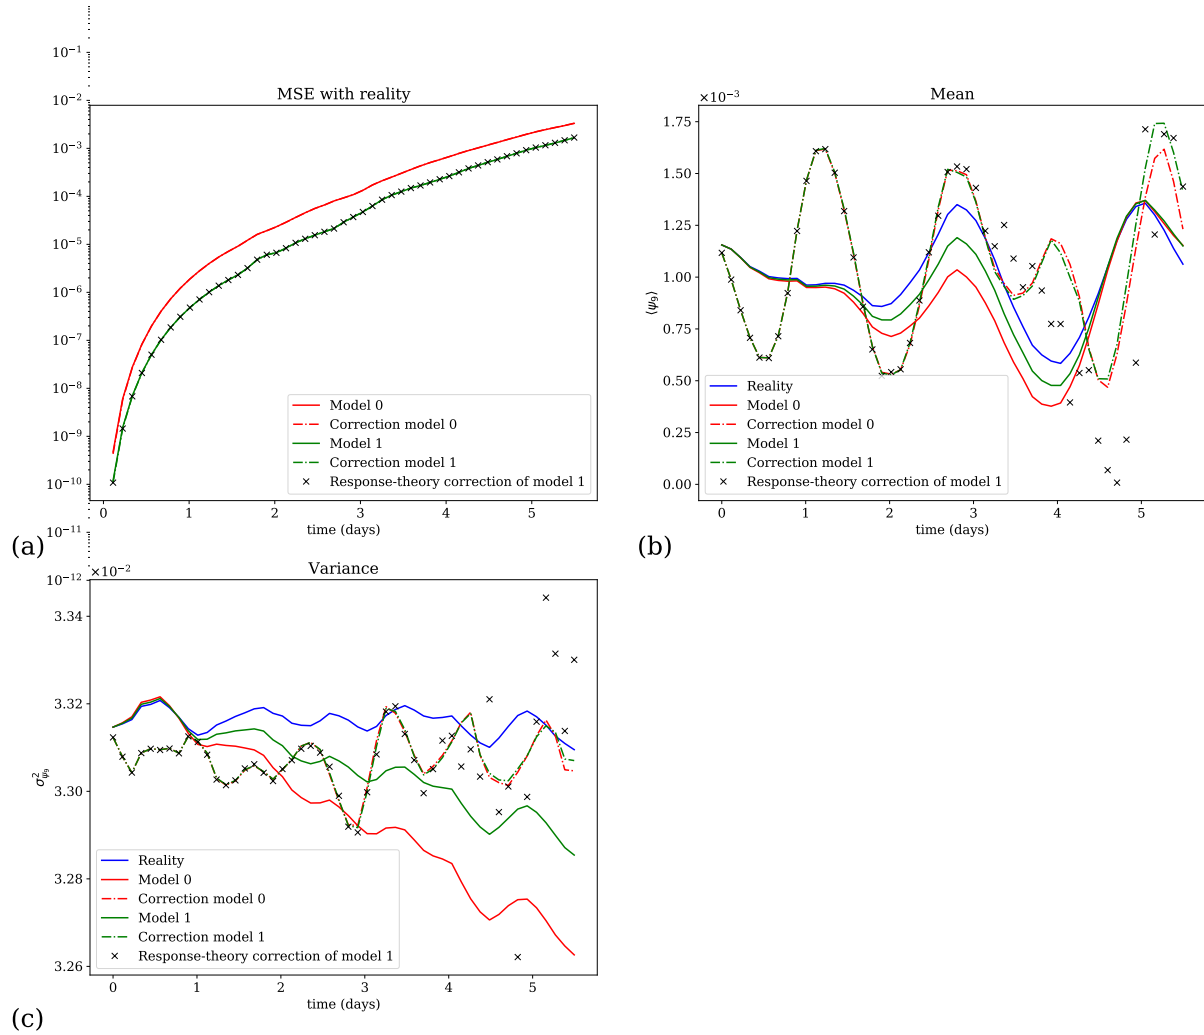

### 2.9.3 Comparison of the efficiency of the response theory correction for different numbers $m$ of trajectories

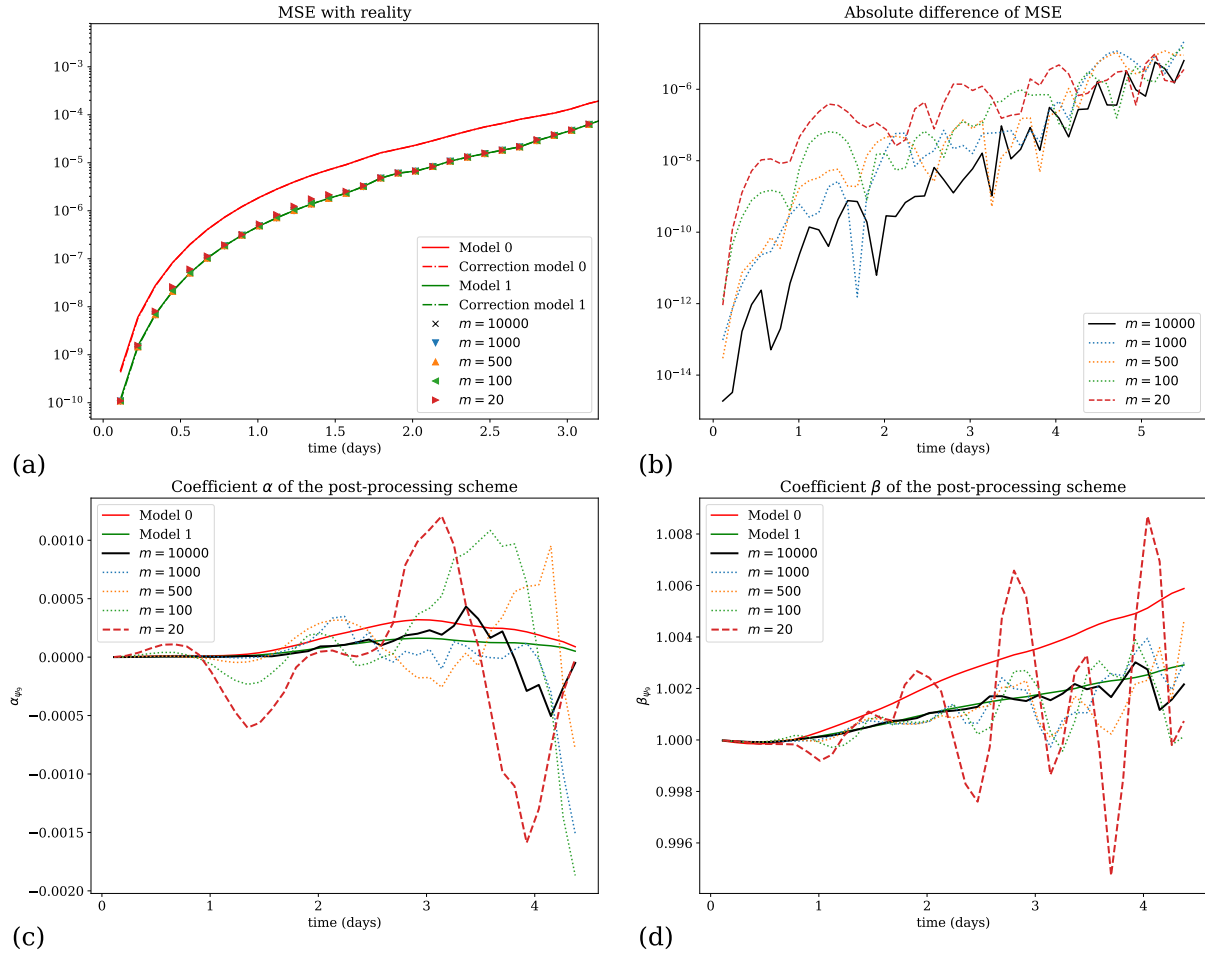

## 2.10 Variable $\psi_{10}$

### 2.10.1 Corrections of the moments of the variable

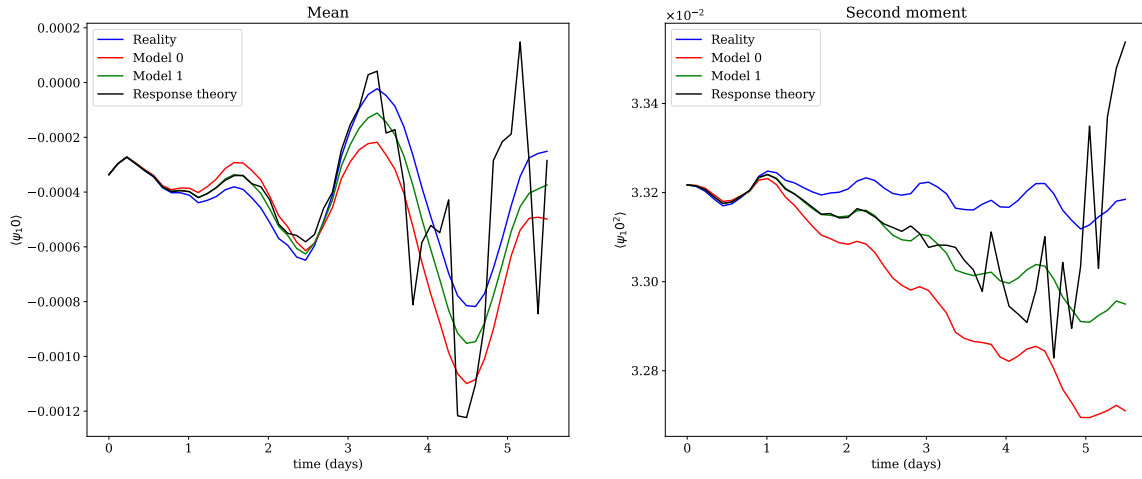

### 2.10.2 Performance of the correction

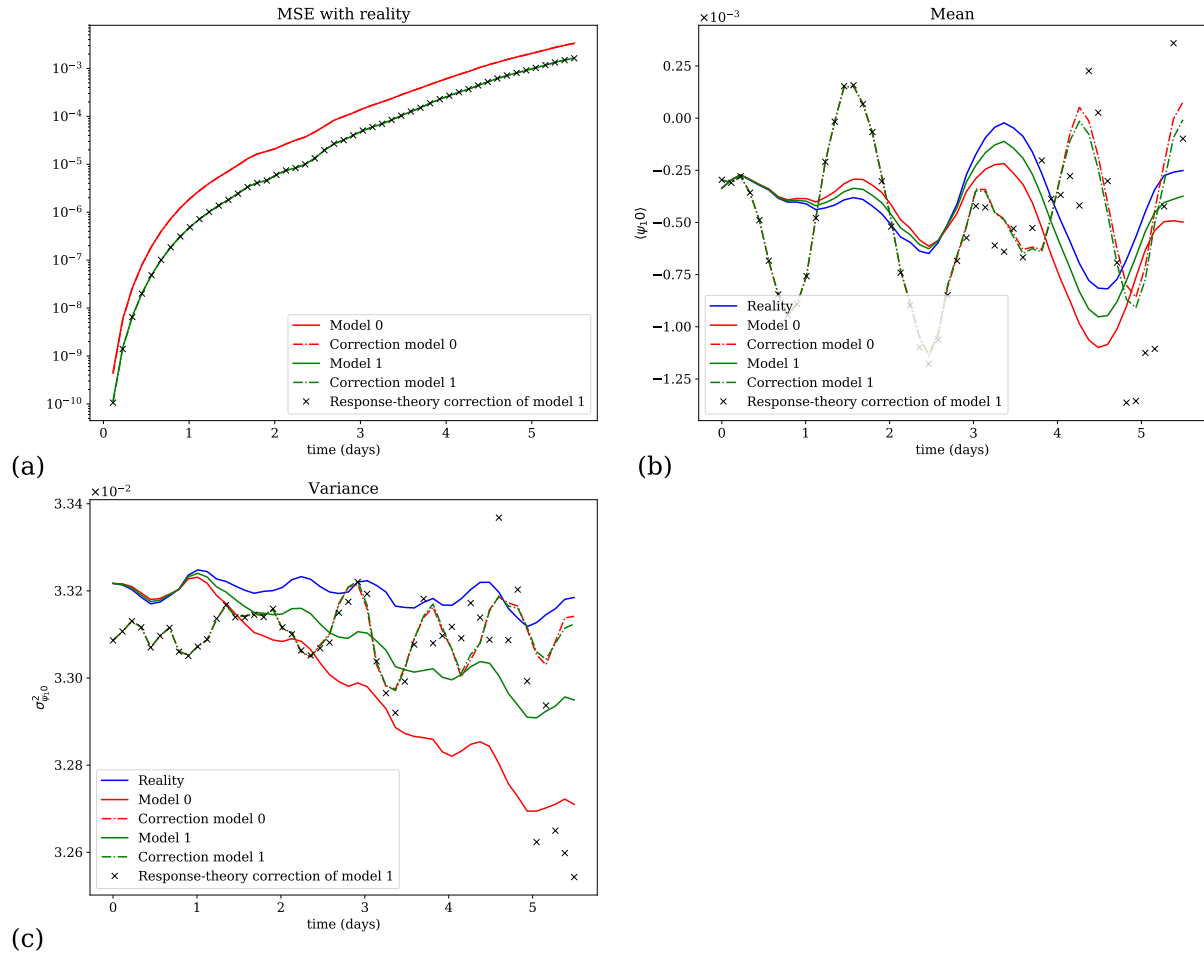

### 2.10.3 Comparison of the efficiency of the response theory correction for different numbers $m$ of trajectories

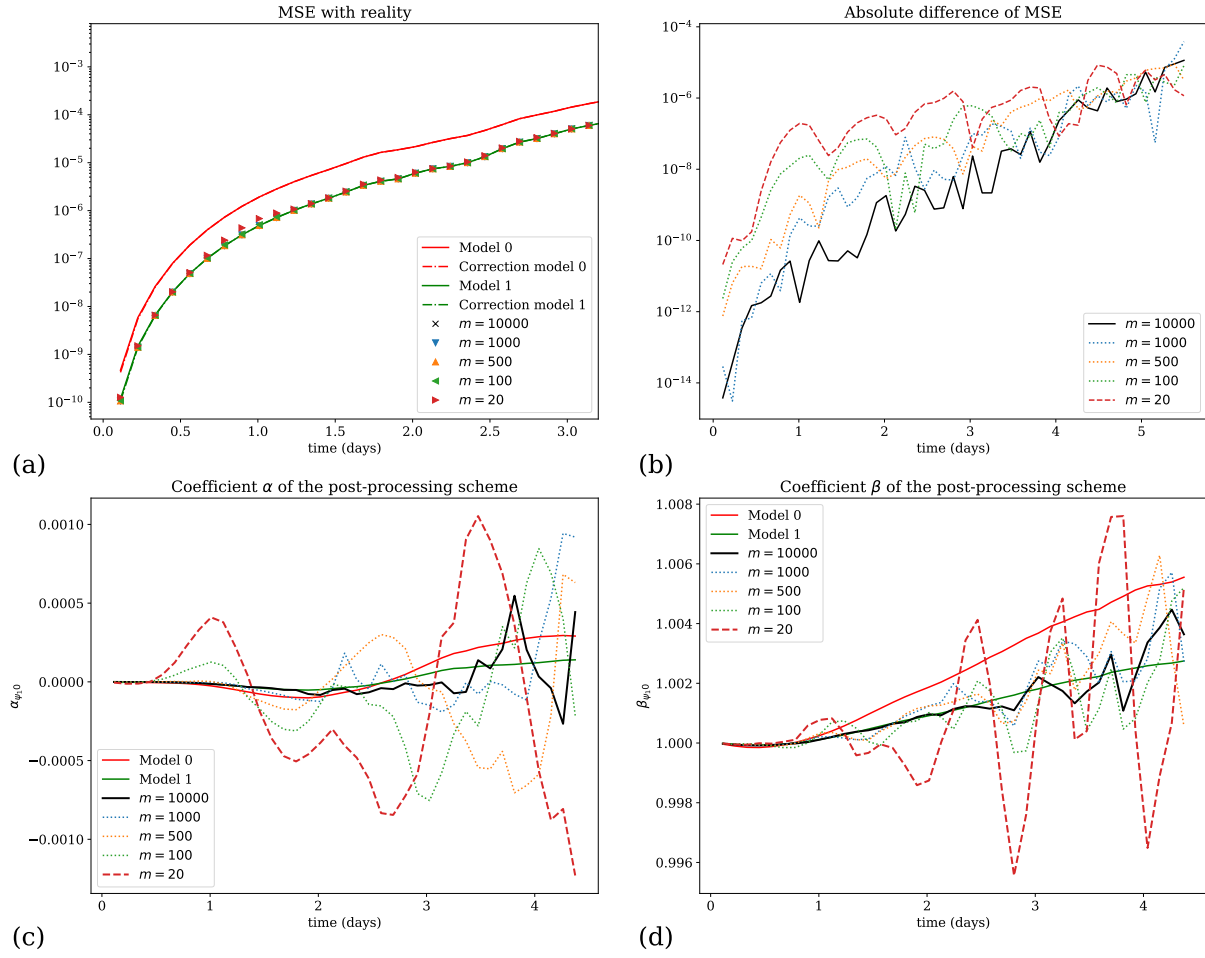

## 2.11 Variable $\theta_1$

### 2.11.1 Corrections of the moments of the variable

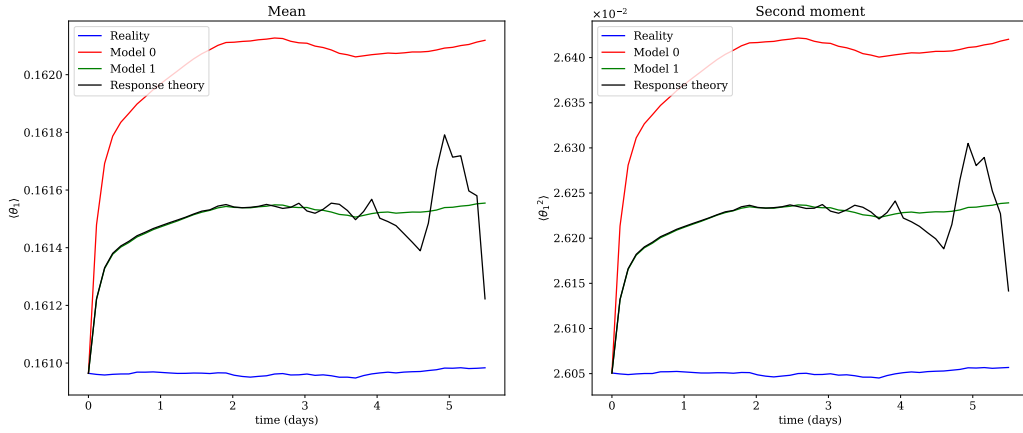

### 2.11.2 Performance of the correction

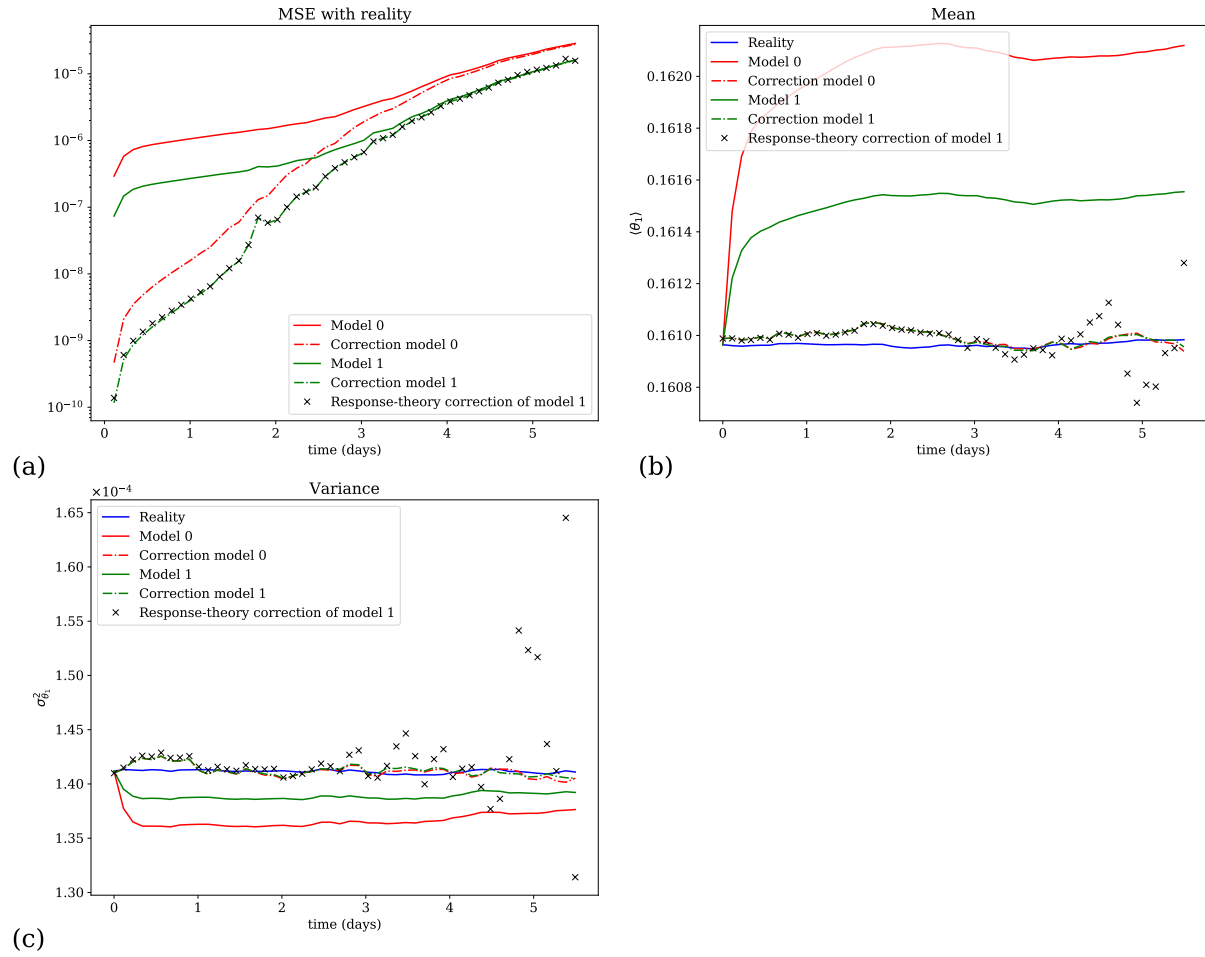

### 2.11.3 Comparison of the efficiency of the response theory correction for different numbers $m$ of trajectories

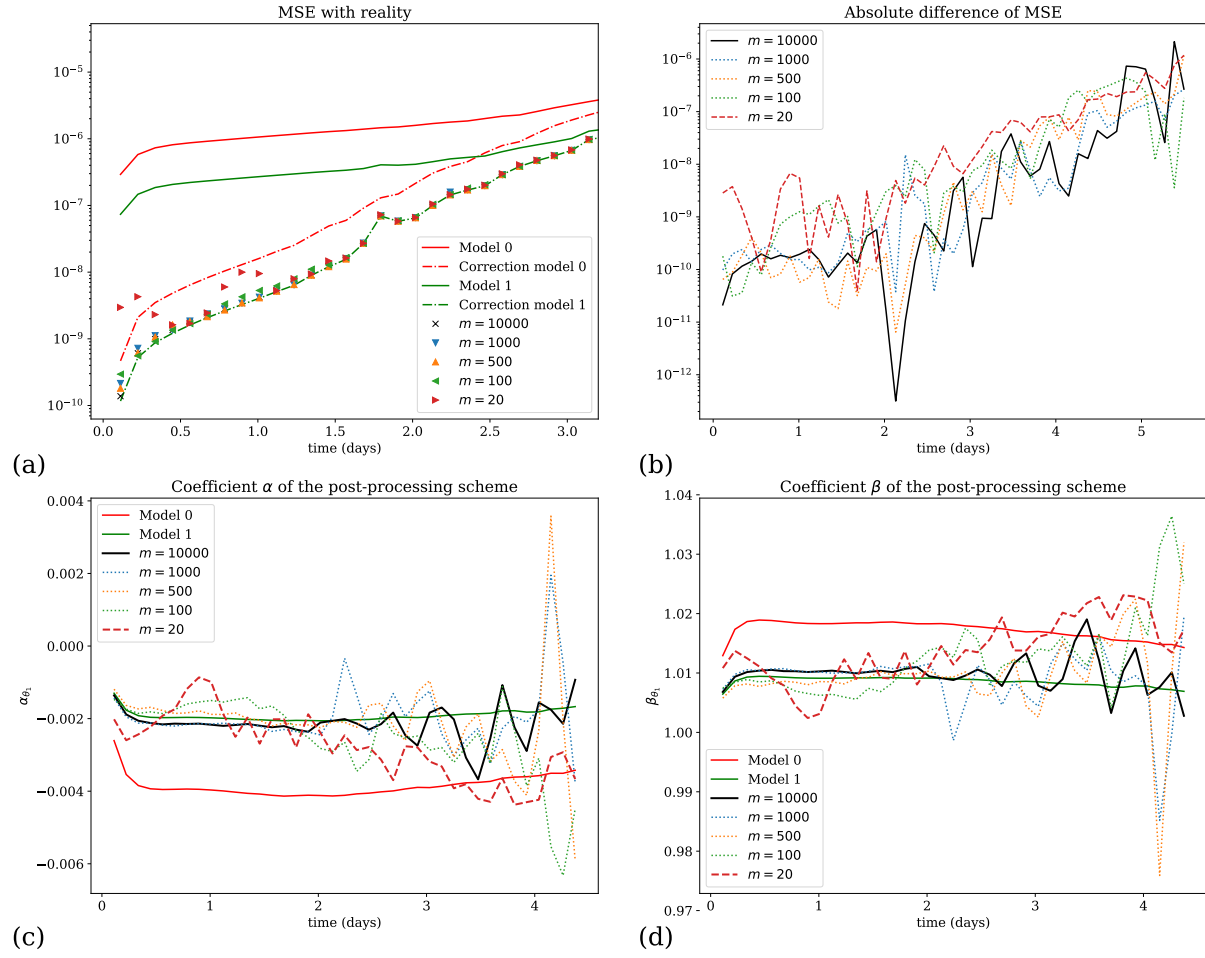



## 2.12 Variable $\theta_2$

### 2.12.1 Corrections of the moments of the variable

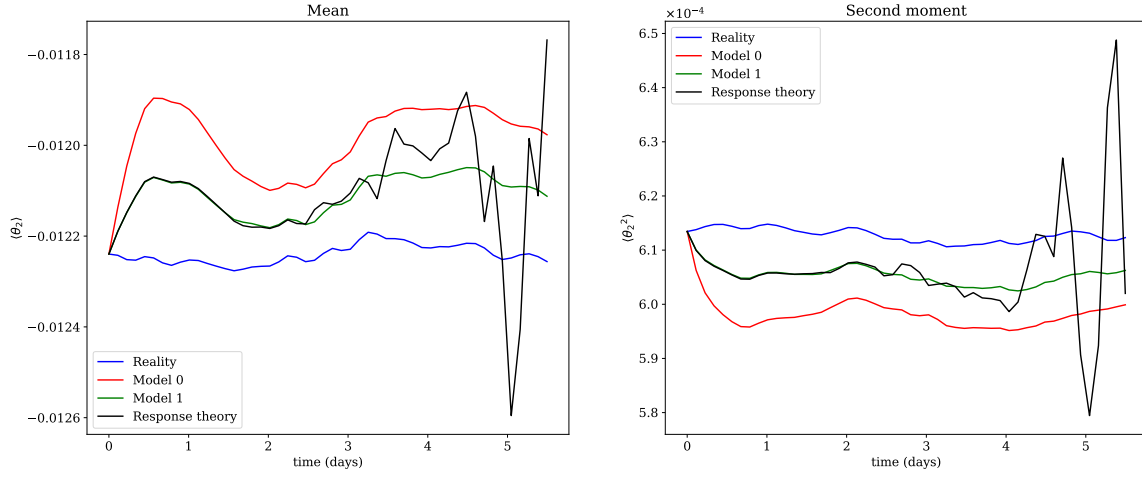

### 2.12.2 Performance of the correction

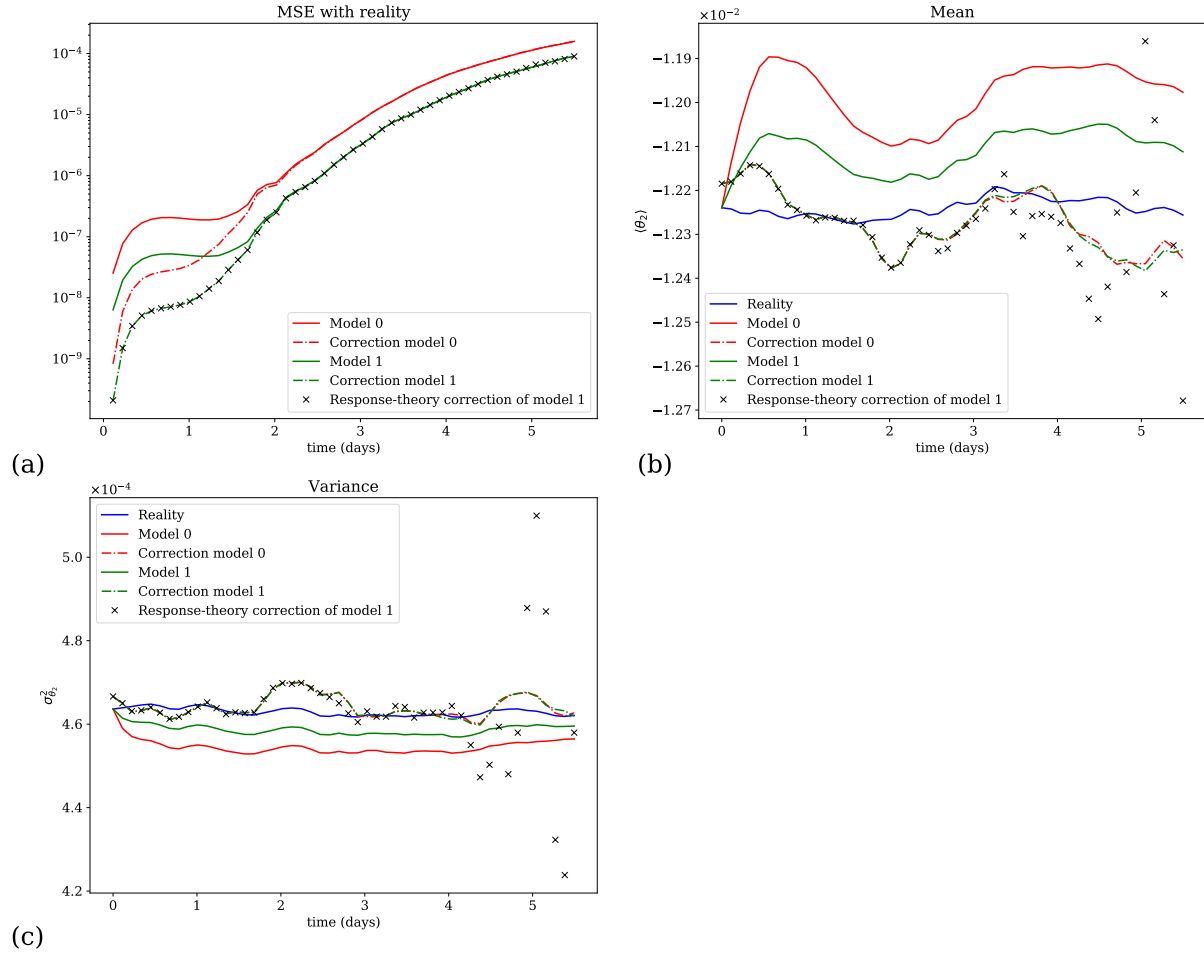

### 2.12.3 Comparison of the efficiency of the response theory correction for different numbers $m$ of trajectories

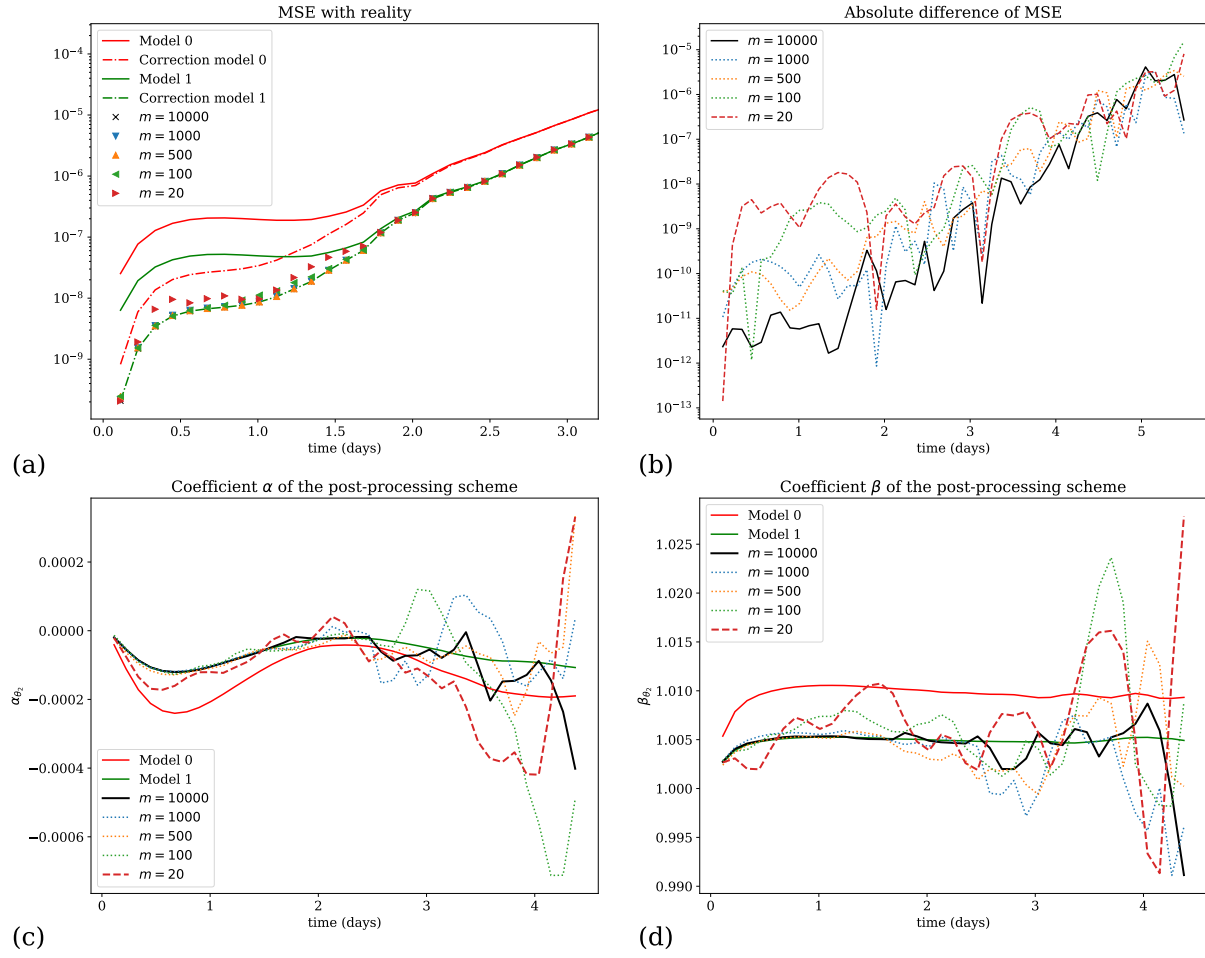

## 2.13 Variable $\theta_3$

### 2.13.1 Corrections of the moments of the variable

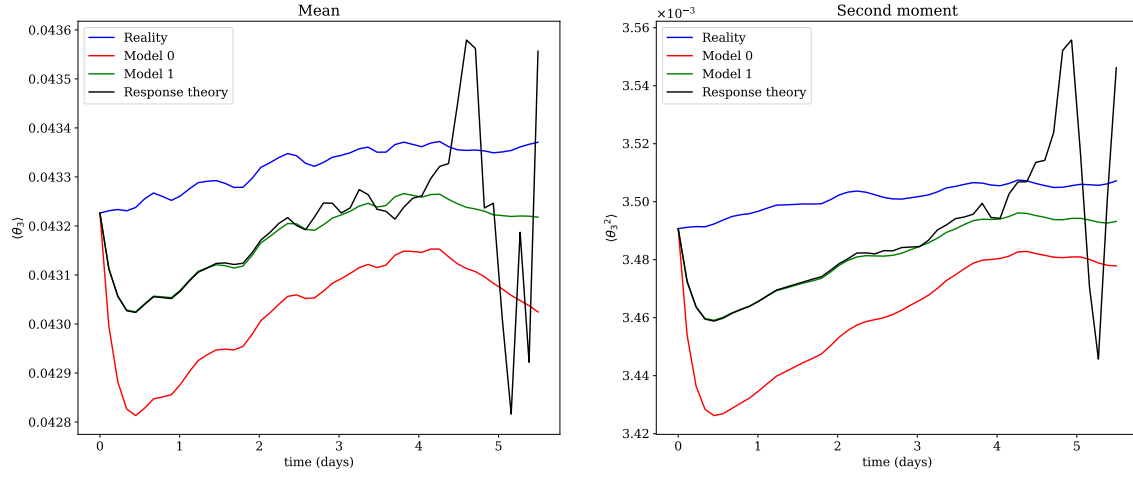

### 2.13.2 Performance of the correction

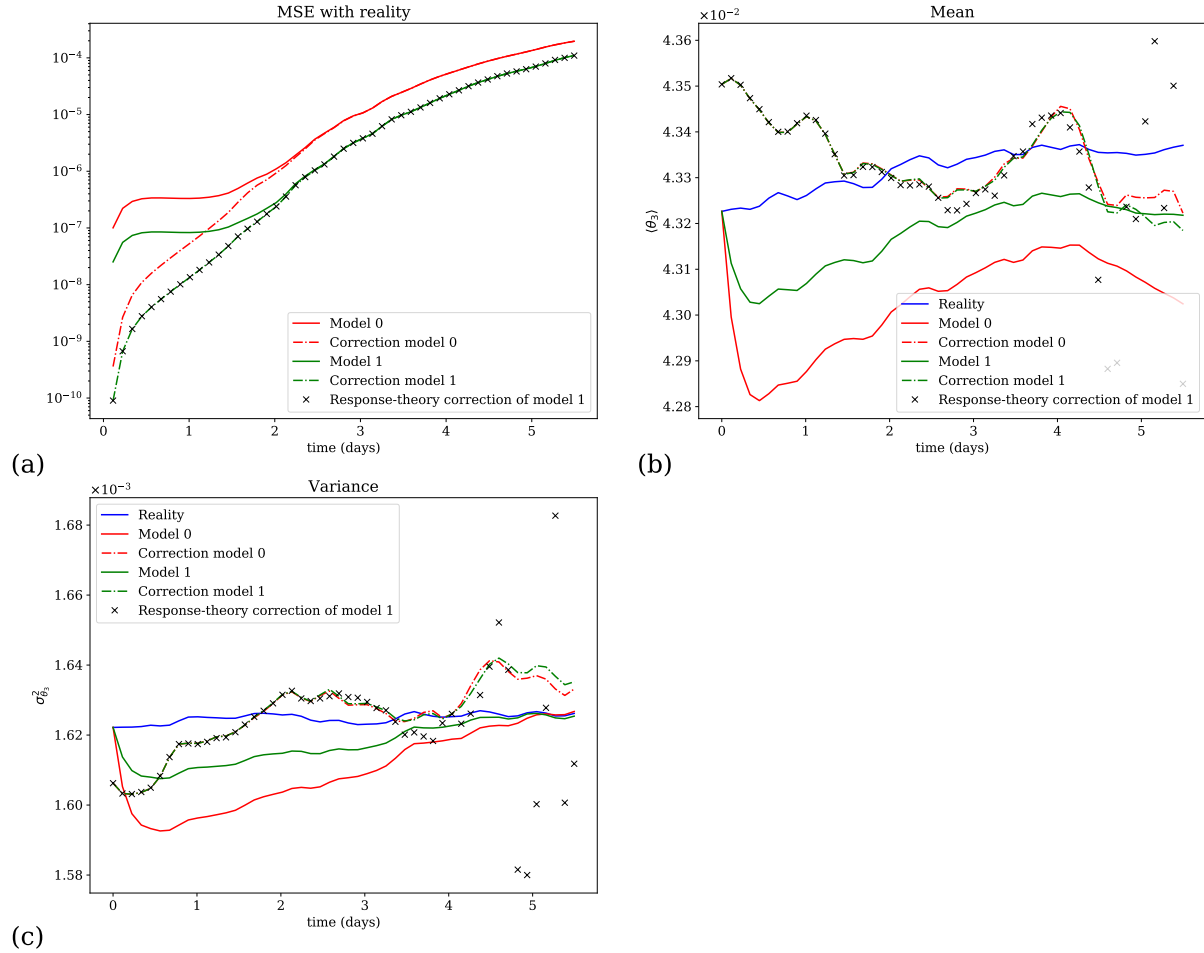

### 2.13.3 Comparison of the efficiency of the response theory correction for different numbers $m$ of trajectories

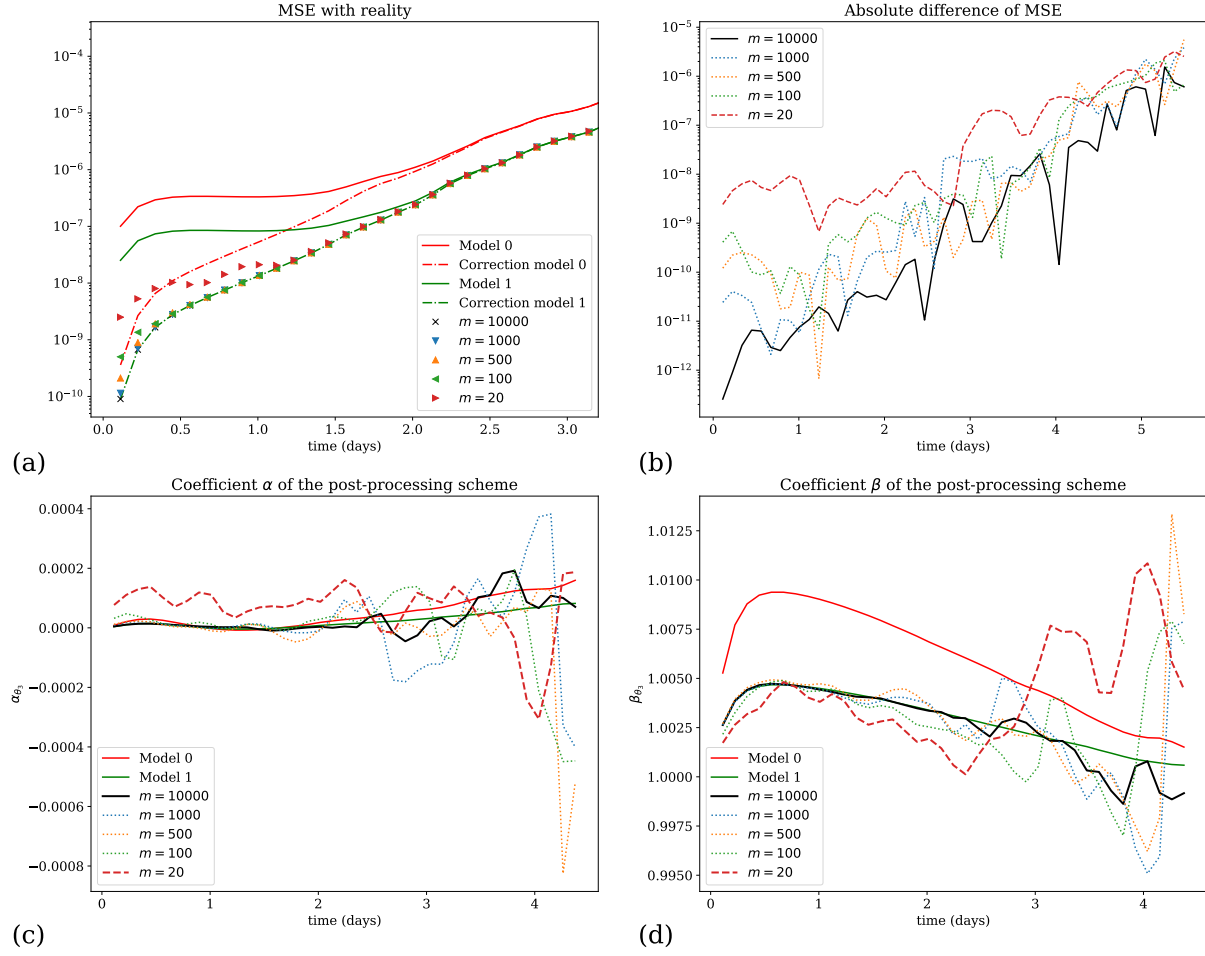

## 2.14 Variable $\theta_4$

### 2.14.1 Corrections of the moments of the variable

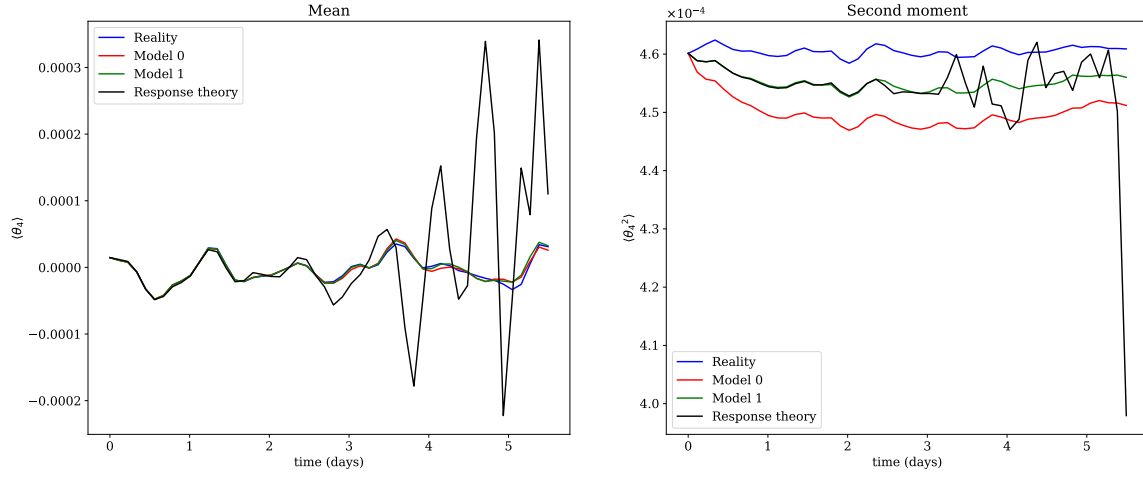

### 2.14.2 Performance of the correction

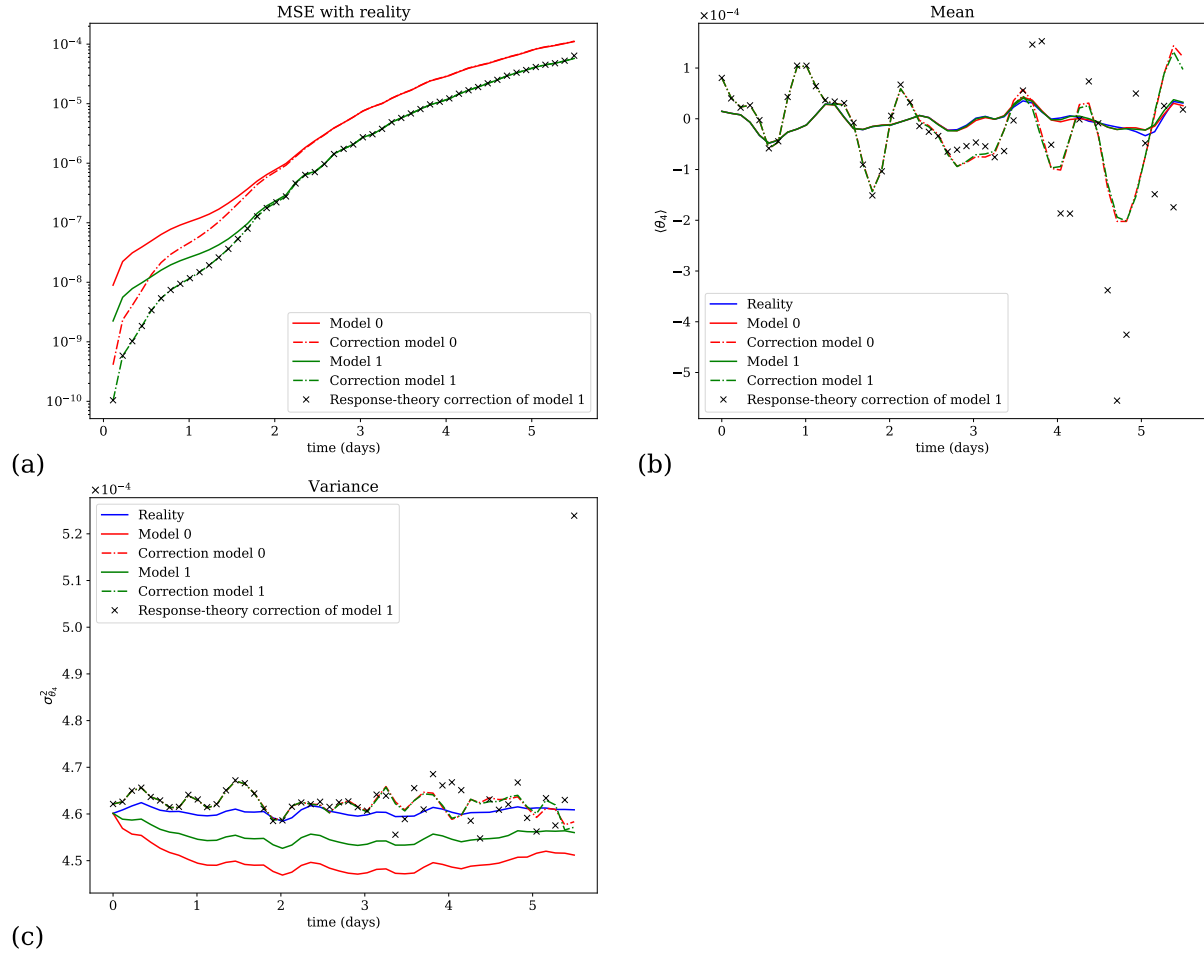

### 2.14.3 Comparison of the efficiency of the response theory correction for different numbers $m$ of trajectories

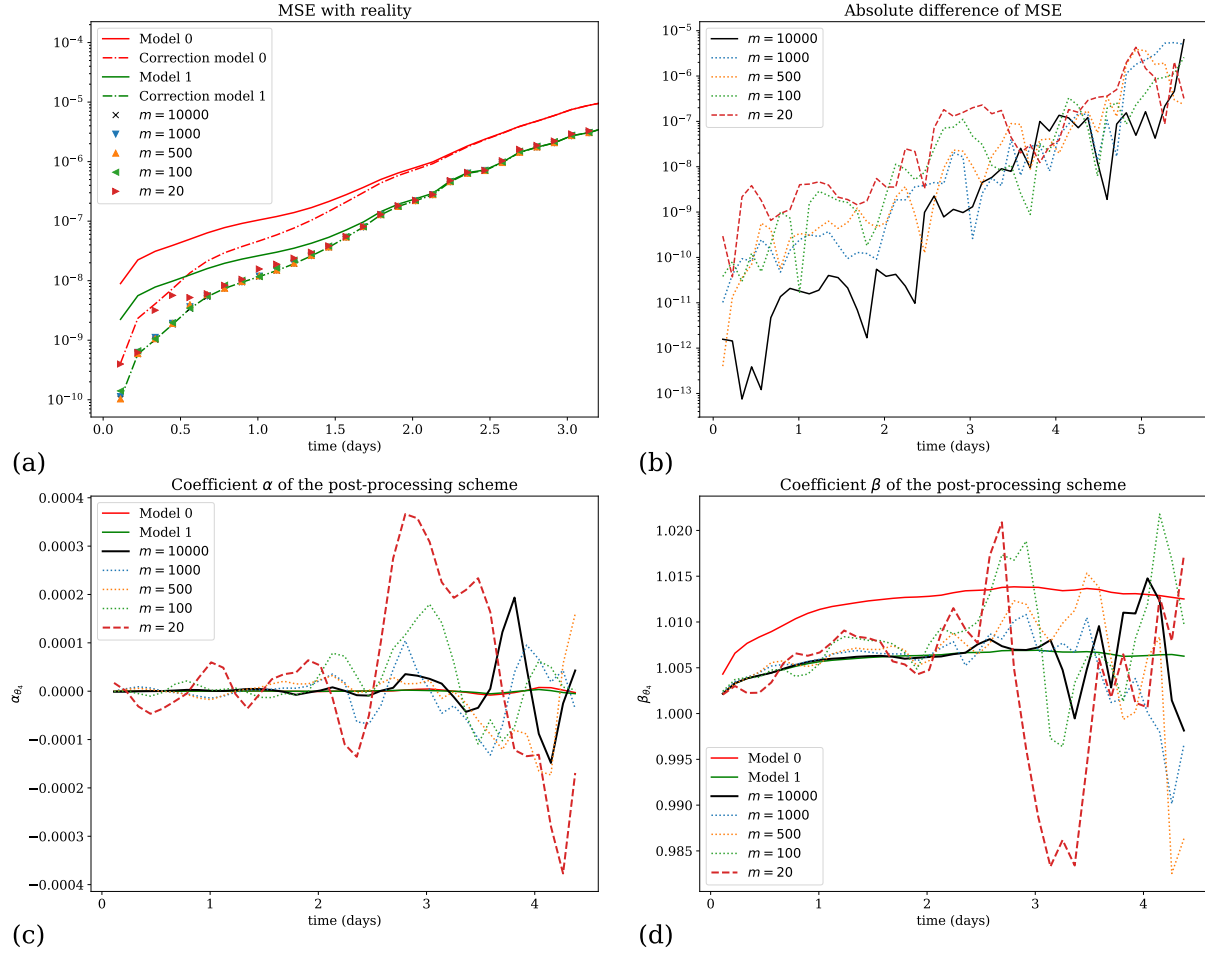

## 2.15 Variable $\theta_5$

### 2.15.1 Corrections of the moments of the variable

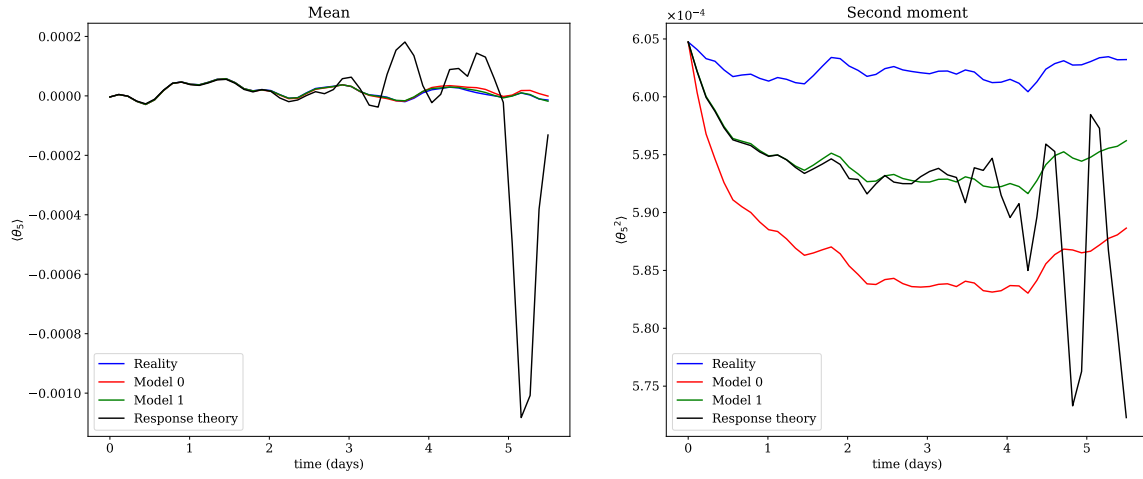

### 2.15.2 Performance of the correction

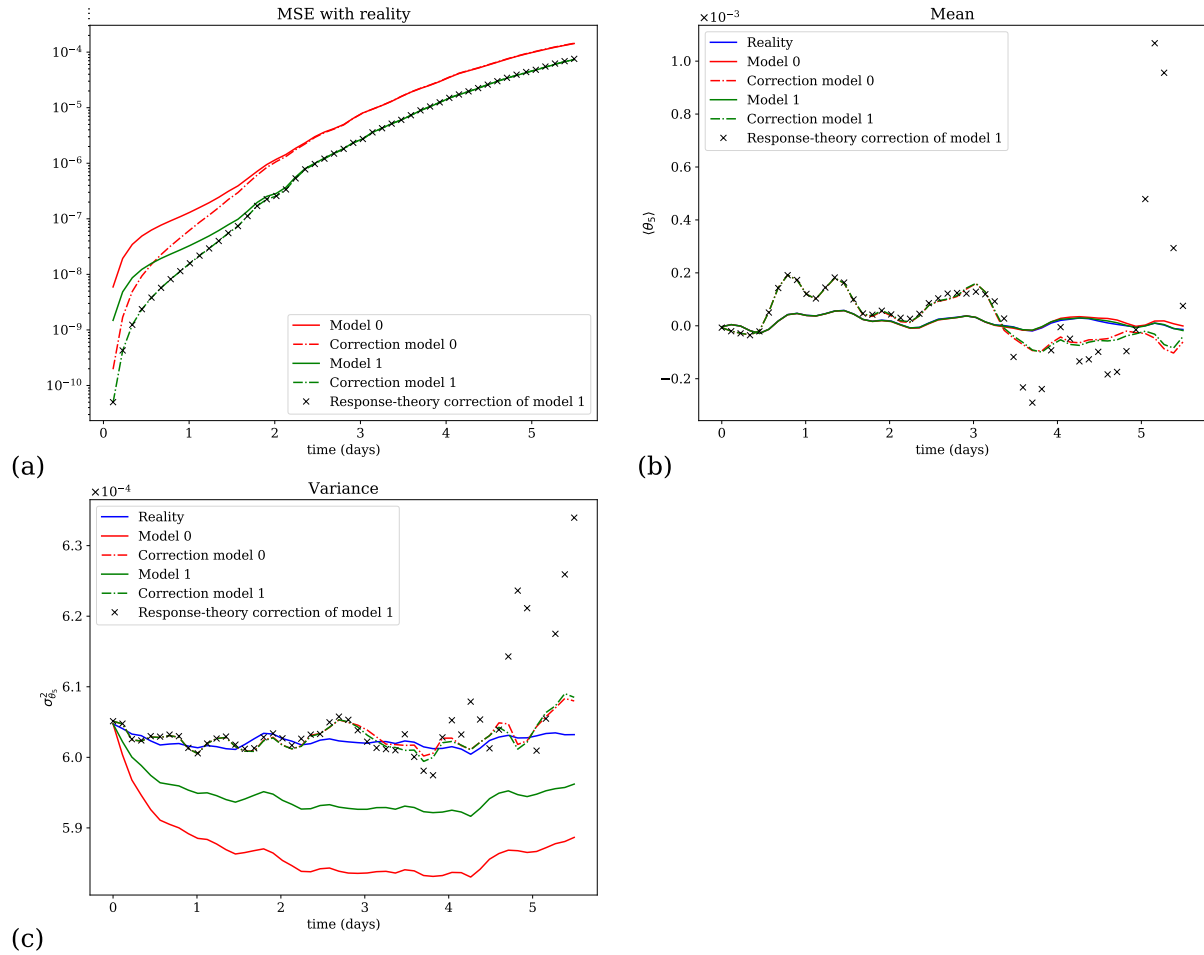

### 2.15.3 Comparison of the efficiency of the response theory correction for different numbers $m$ of trajectories

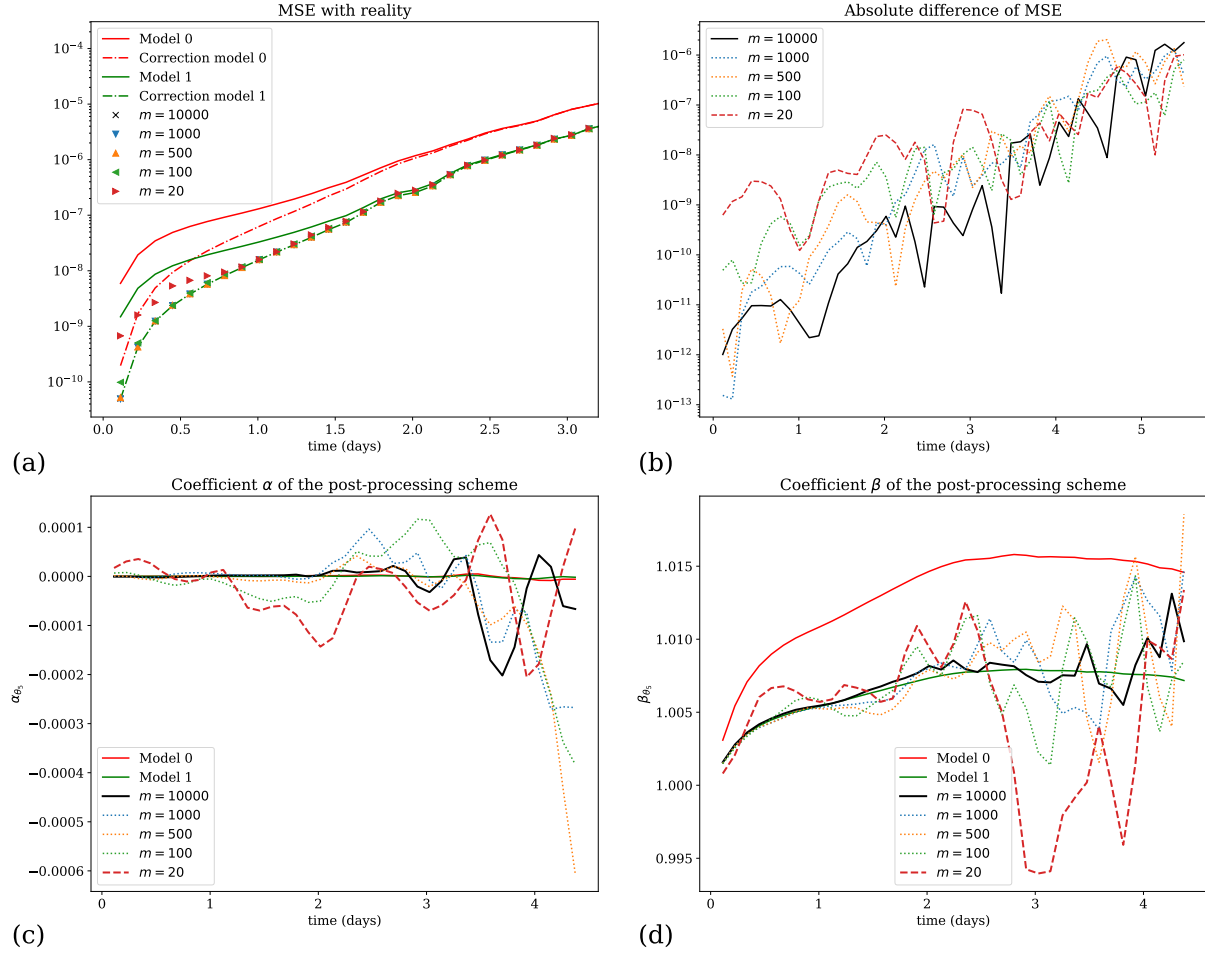



## 2.16 Variable $\theta_6$

### 2.16.1 Corrections of the moments of the variable

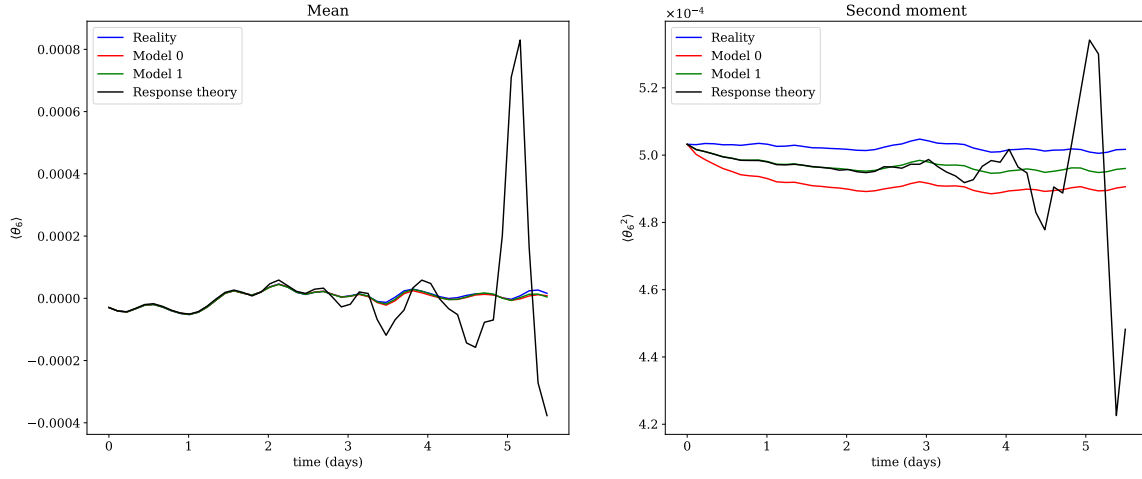

### 2.16.2 Performance of the correction

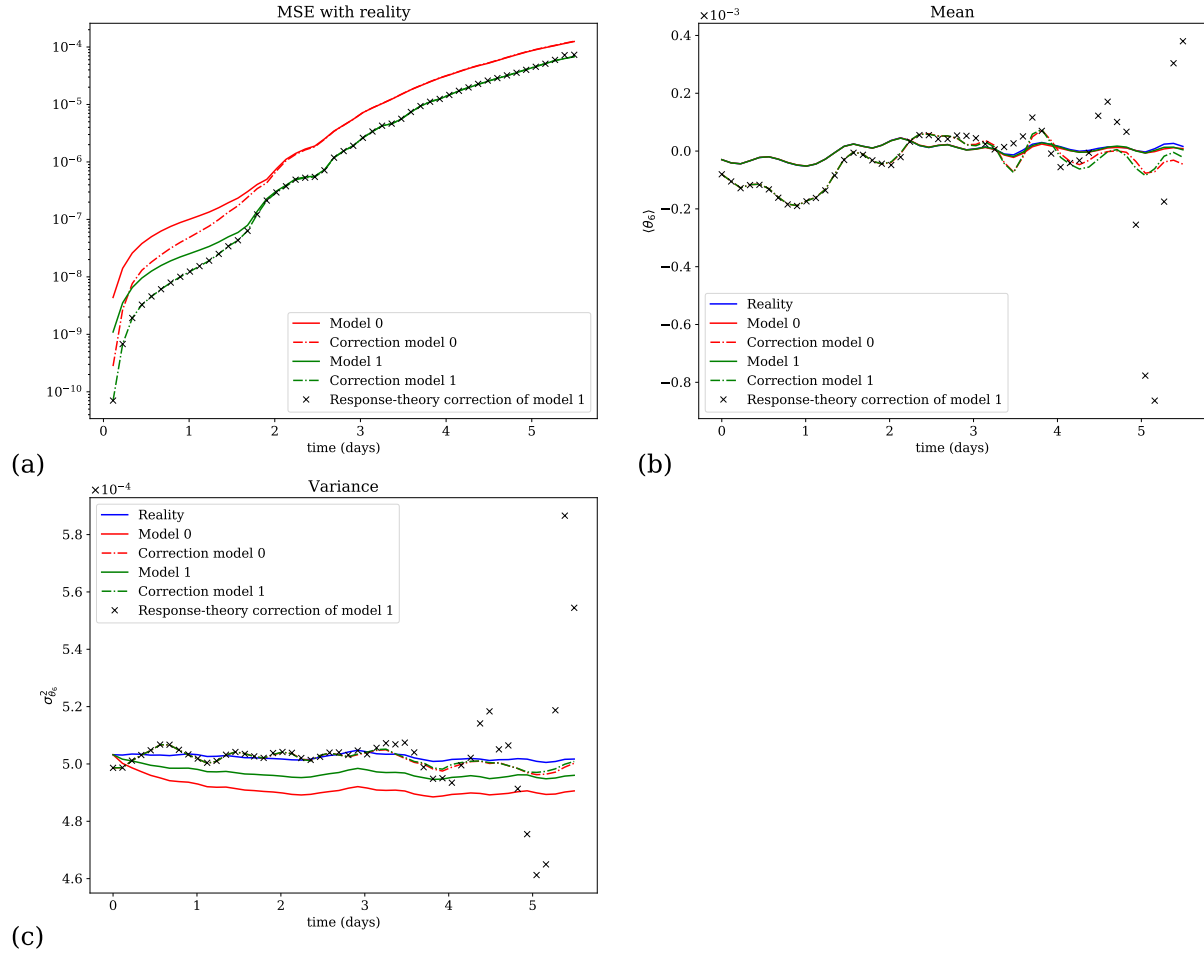

### 2.16.3 Comparison of the efficiency of the response theory correction for different numbers $m$ of trajectories

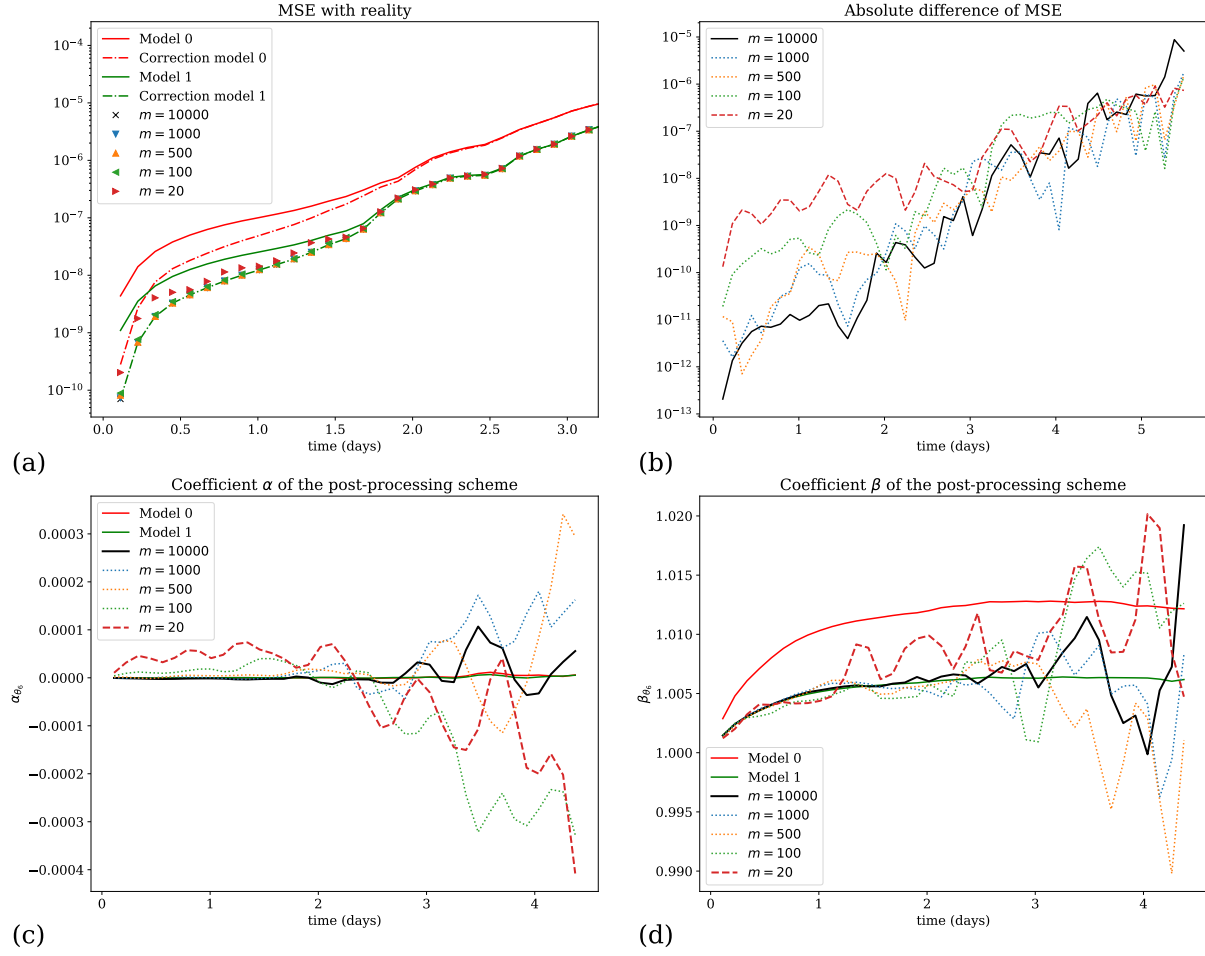

## 2.17 Variable $\theta_7$

### 2.17.1 Corrections of the moments of the variable

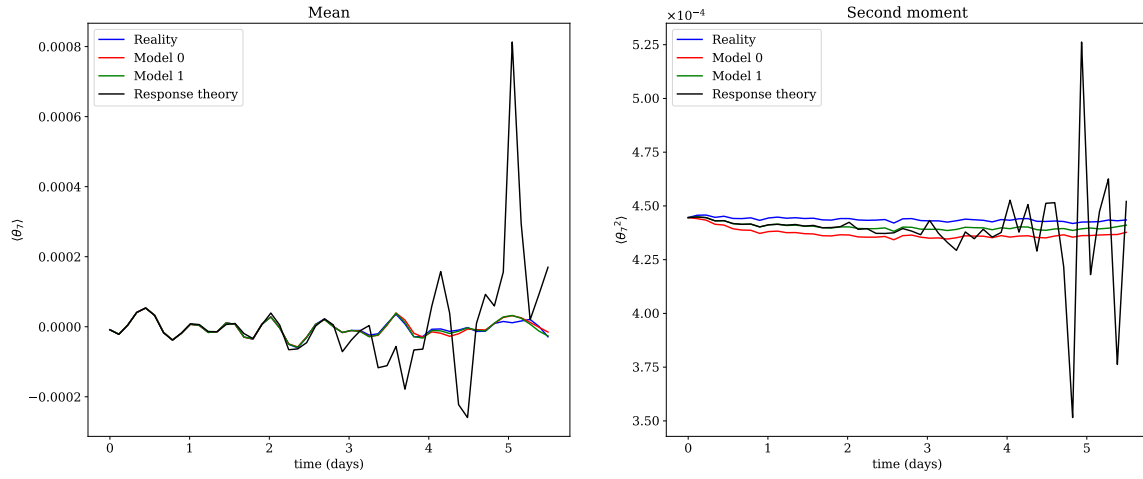

### 2.17.2 Performance of the correction

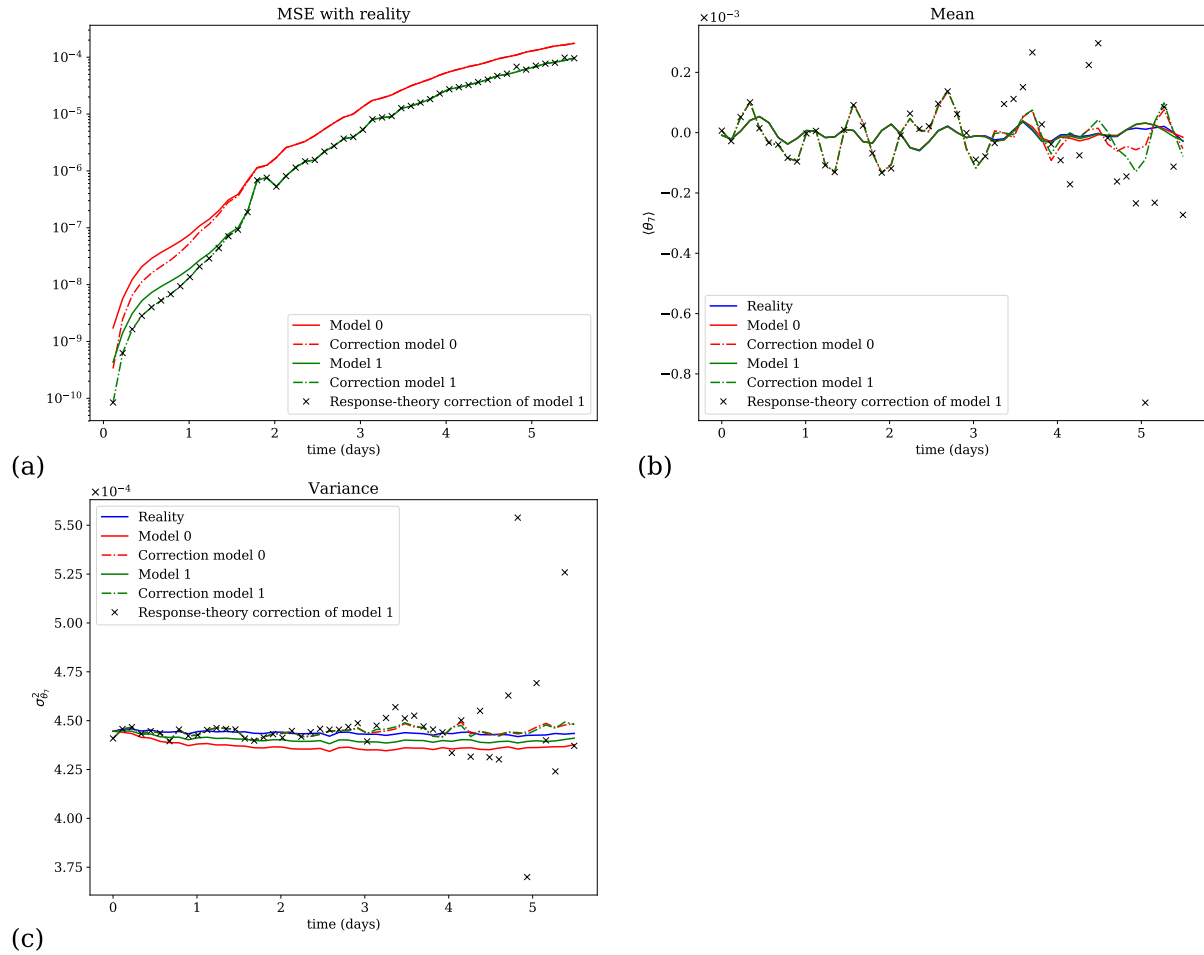

### 2.17.3 Comparison of the efficiency of the response theory correction for different numbers $m$ of trajectories

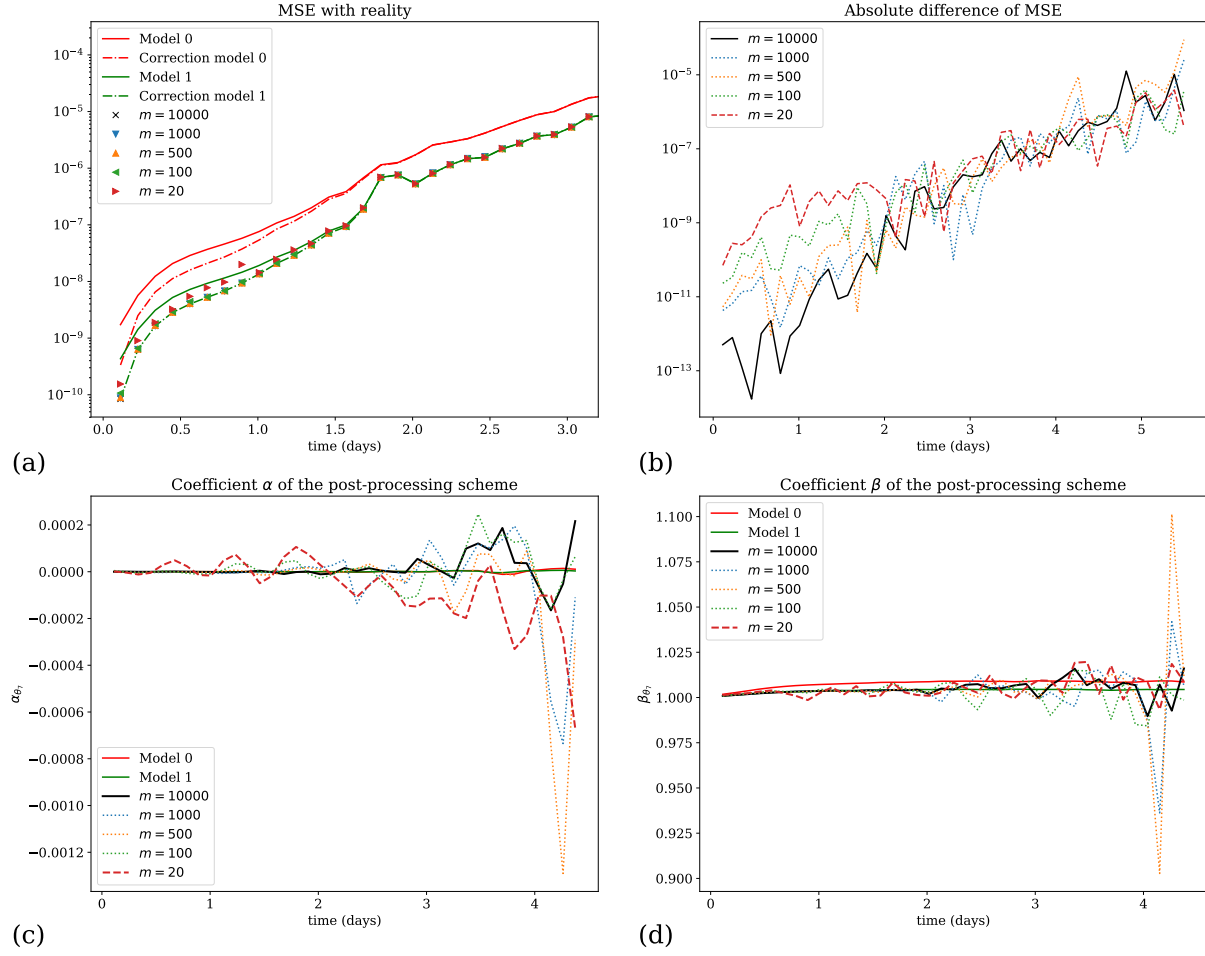

## 2.18 Variable $\theta_8$

### 2.18.1 Corrections of the moments of the variable

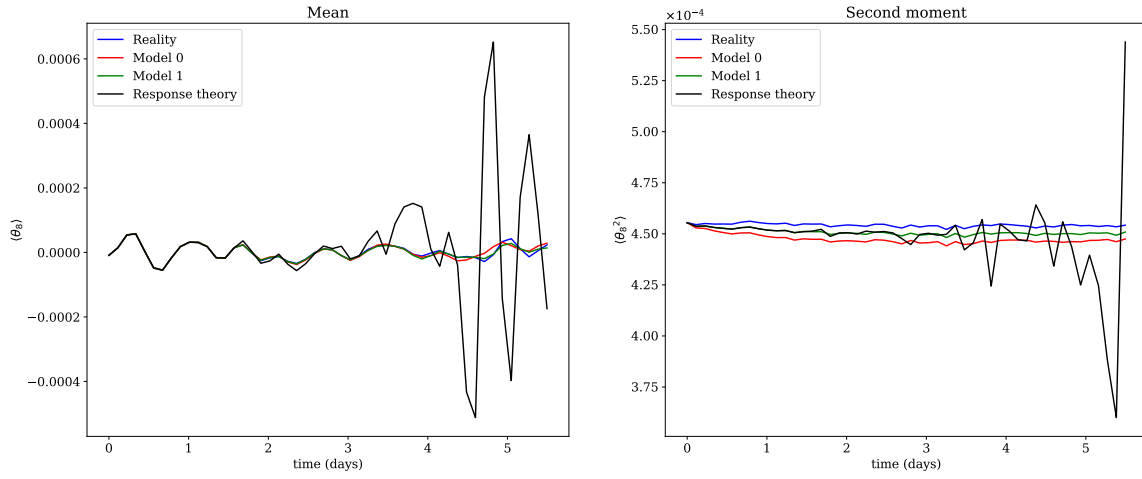

### 2.18.2 Performance of the correction

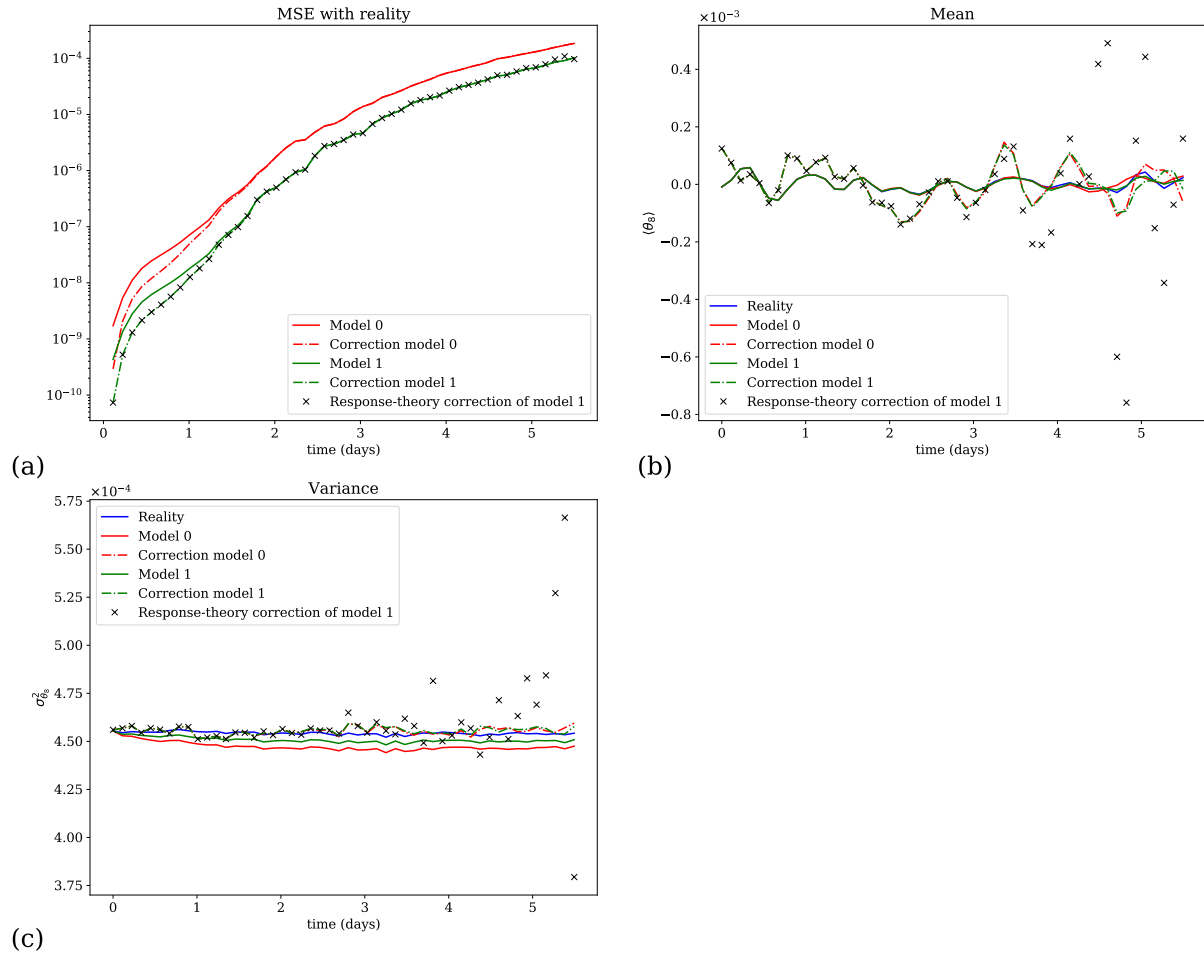

### 2.18.3 Comparison of the efficiency of the response theory correction for different numbers $m$ of trajectories

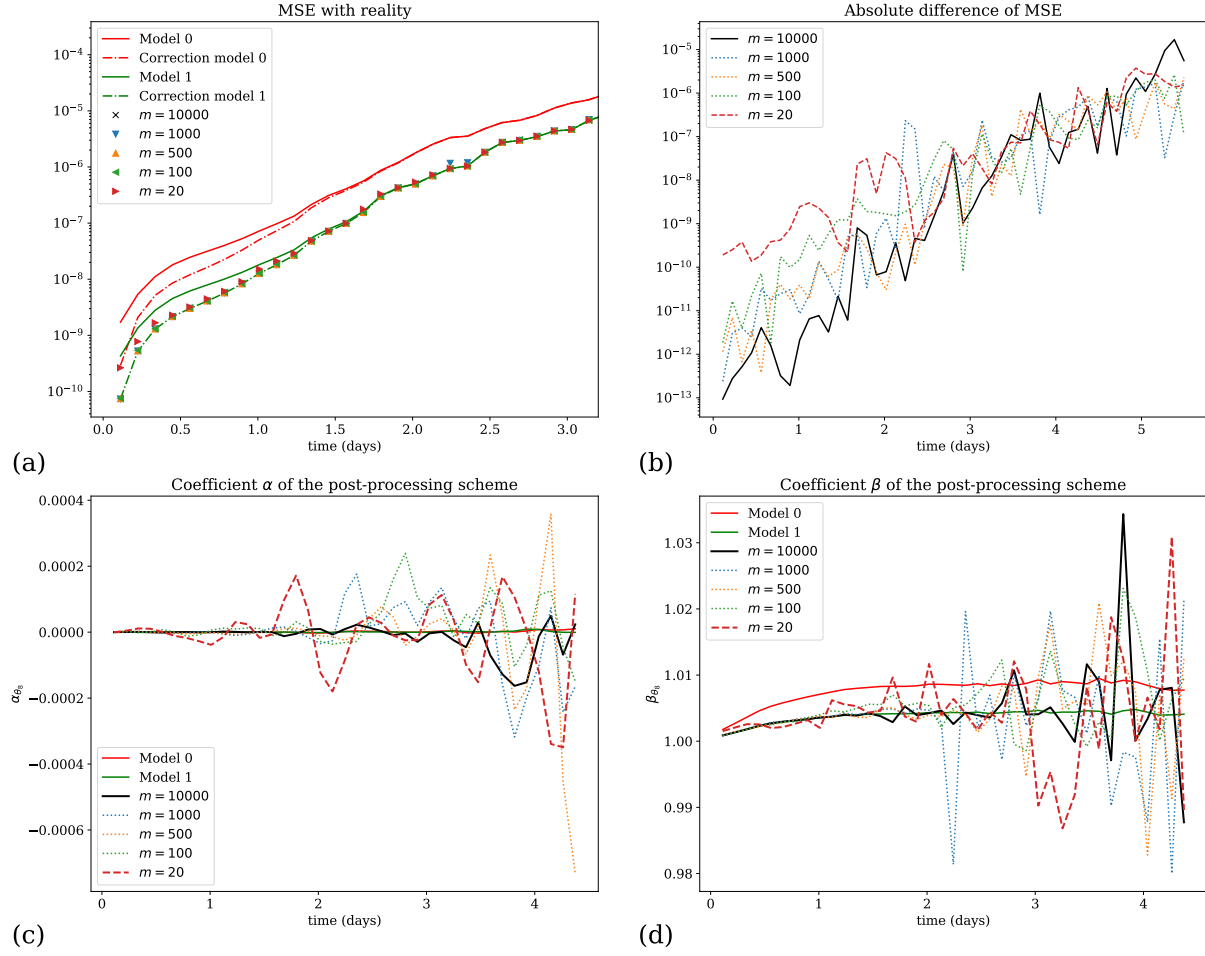

## 2.19 Variable $\theta_9$

### 2.19.1 Corrections of the moments of the variable

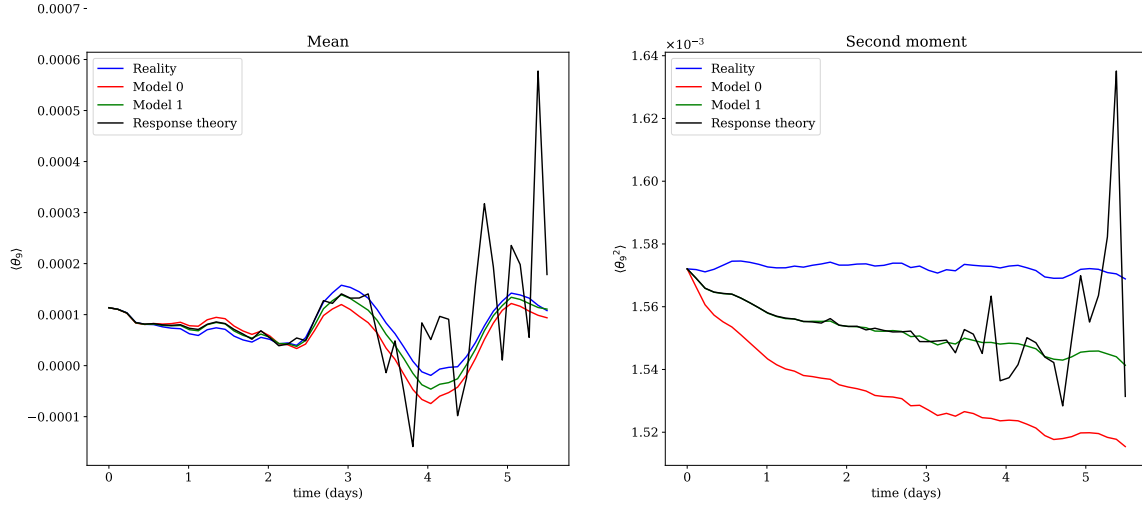

### 2.19.2 Performance of the correction

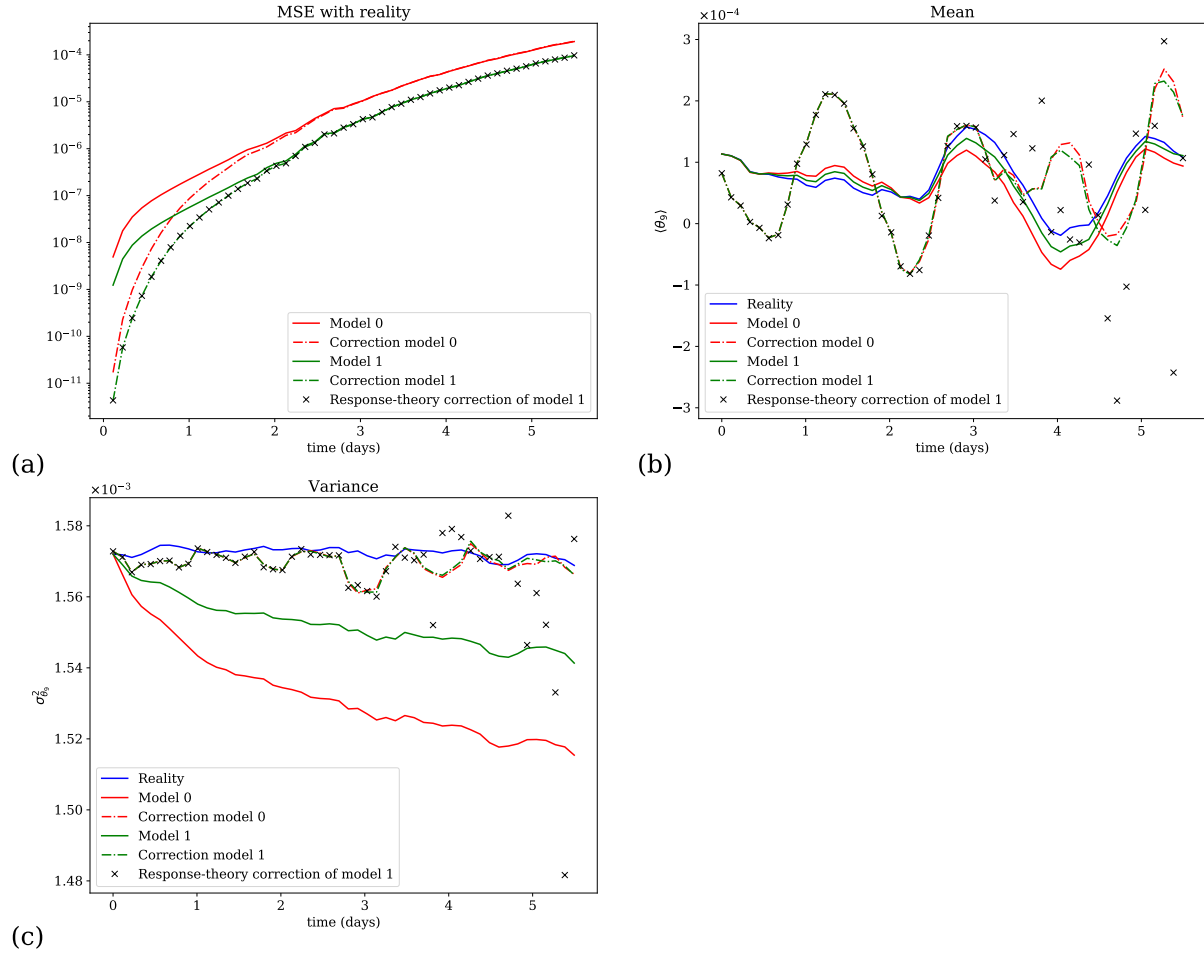

### 2.19.3 Comparison of the efficiency of the response theory correction for different numbers $m$ of trajectories

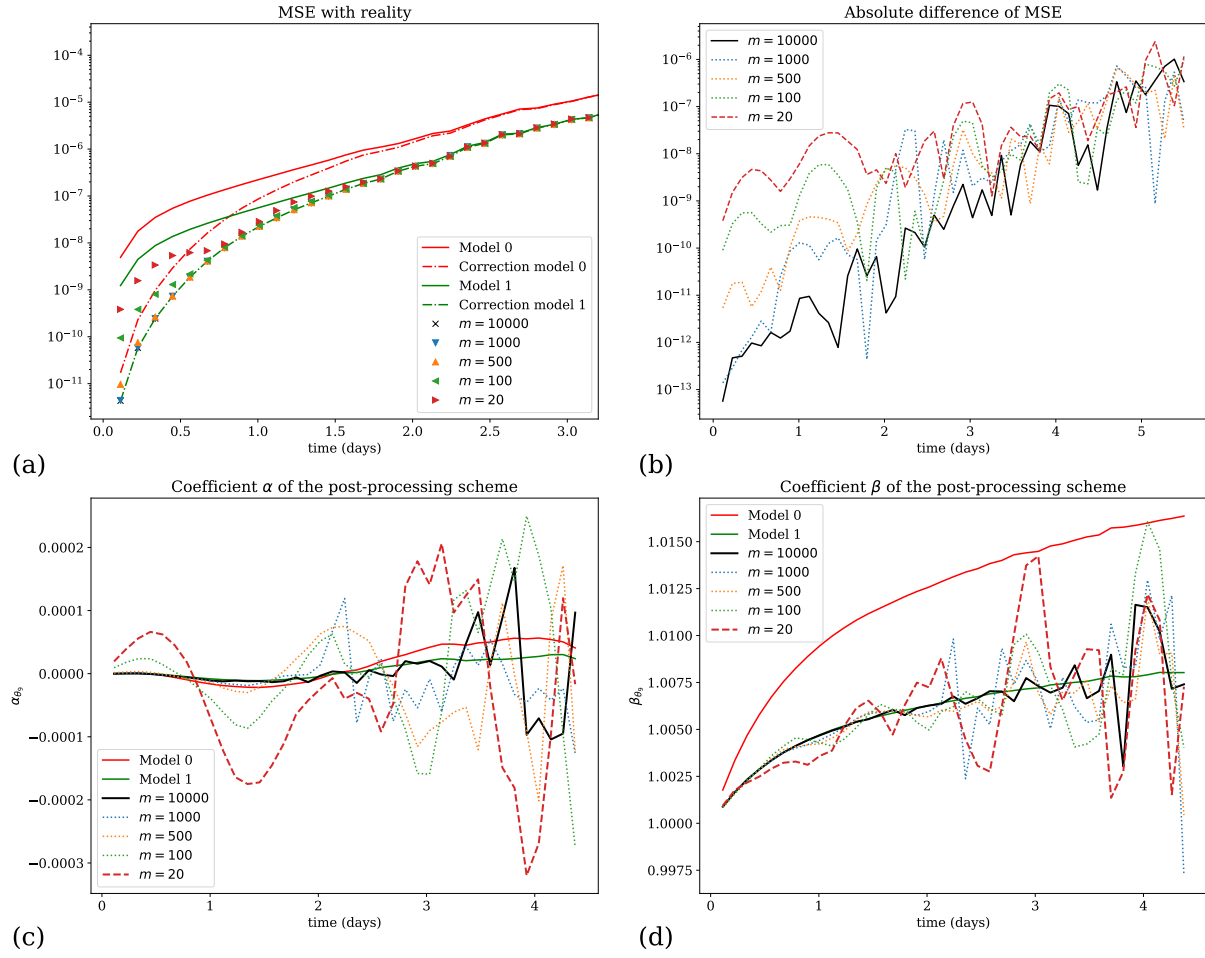



## 2.20 Variable $\theta_{10}$

### 2.20.1 Corrections of the moments of the variable

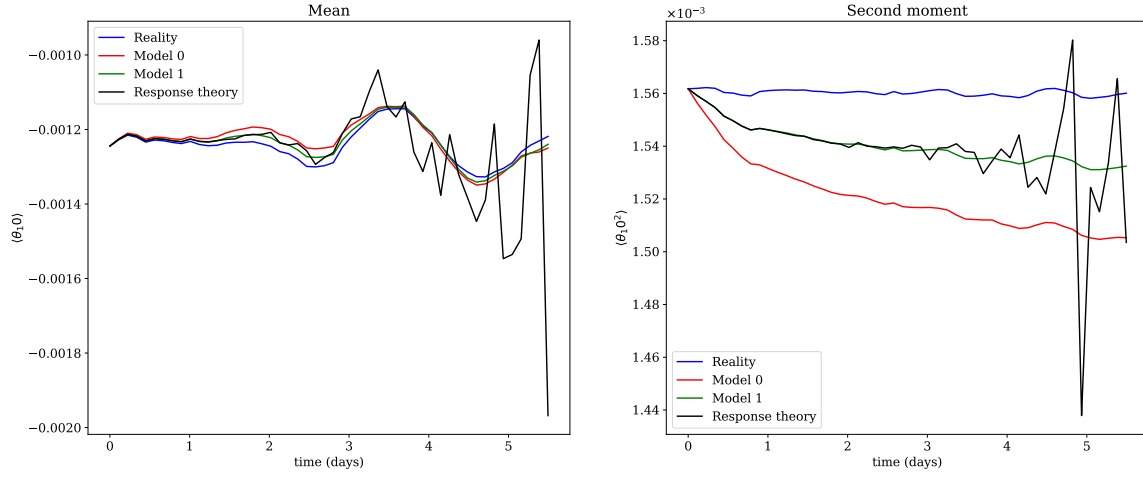

### 2.20.2 Performance of the correction

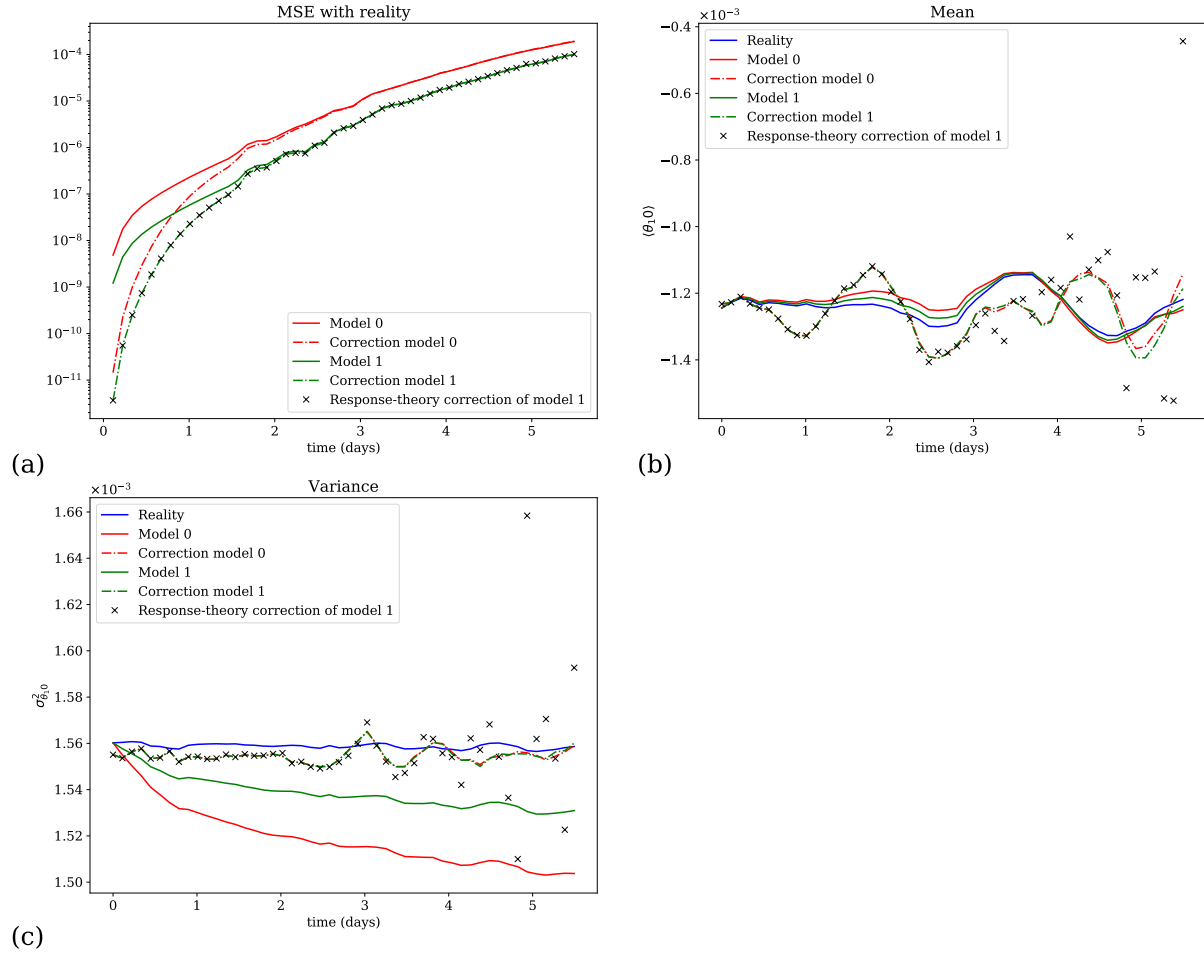

### 2.20.3 Comparison of the efficiency of the response theory correction for different numbers $m$ of trajectories

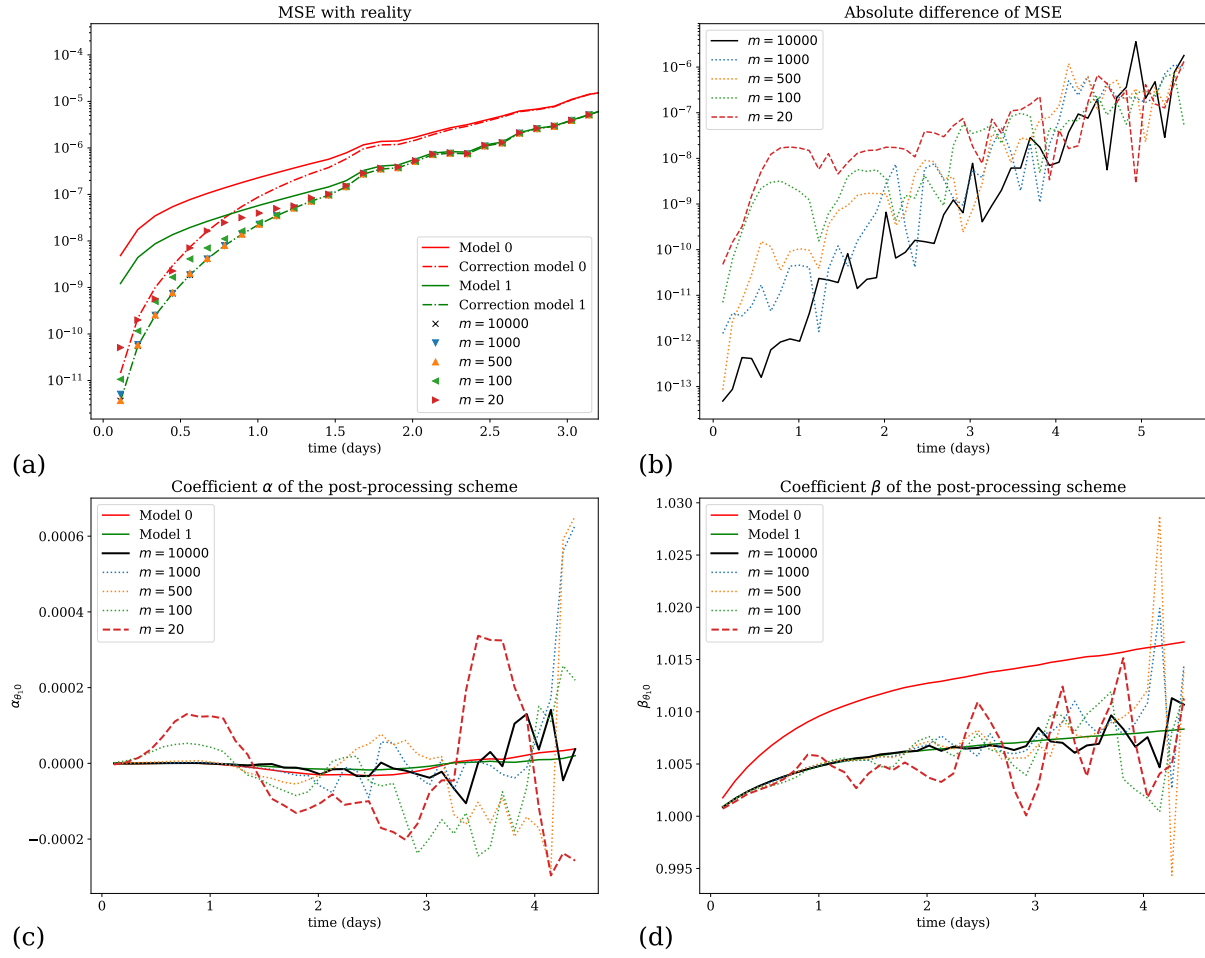

Supplement: Supplementary file 1 [file npg-2019-57-supplement.zip]
